# Supplementary material for: Heat stress responsive genes are not affected by ocean warming: long-term environmental monitoring and acute thermal stress experiments identify non-overlapping sets of differentially expressed genes in a marine fish
Source: Research Square preprint supplement (doi:10.21203/rs.3.rs-7212941/v1), 2025-07-31
Supplement: Supplementary file 1 [file 64150880ffc177562fda1ce1.xlsx]

## Sheet: Overview
Title:	Heat stress responsive genes are not affected by ocean warming: long-term environmental monitoring and acute thermal stress experiments identify non-overlapping sets of differentially expressed genes in a marine fish
Authors:	Marie V. Brasseur, Christina Bakowski, Mark Christie, Nico Fuhrmann, Anja Locker, Lars Podsiadlowski, Joachim Sturve, Stefan Prost, Christoph Mayer, Henrik Krehenwinkel
Content:	Table S1	Metadata of environmental specimen bank pool samples.
	Table S2	RNA sequencing statistics of the samples obtained from the acute heat stress experiment.
	Table S3	Annotation information of the 151 genes that are differentially expressed due to heat stress and due to time.
	Table S4	Gene ontoloty term enrichment results for Z. viviparus heat stress responsive genes.
	Table S5	Gene ontoloty term enrichment results for Z. viviparus time responsive genes.
	Table S6	Gene ontoloty term enrichment results for Z. viviparus genes that are differentially expressed between populations from Darss vs. Meldorf Bay.
	Table S7	Gene ontoloty term enrichment results for Z. viviparus genes that are differentially expressed between populations from Darss vs. Varel-Mellum.

## Sheet: Table S1
Table S1: Metadata of environmental specimen bank pool samples. The ocean temperature was extracted from ocean physics data sets predicted by NEMO. Due to the proximity of the two North Sea sampling sites, the temperature profile for these populations was extracted from the same coordinates. Exact temperature either refers to the daily average ocean temperature or, if sampling was conducted over …
Year	Sampling site	Marine region	Sample ID	Date of sampling	Specimen no. in pool	Coordinates to extract predicted temperature	Exact predicted temperature at sea floor	Median predicted temperature at sea floor	Maximum predicted temperature at sea floor	Minimum predicted temperature at sea floor	Average body weight	Average liver weight	Average body length	No. of raw reads	No. of trimmed reads	Alignment rate
1994	Darss	Baltic Sea	Dar_94	07.06.	45	[54.50822, 12.51363]	12.6396	12.945	16.43	6.39	112.267	2.41591	28.5667	29262019	29096603	0.9436
1999	Darss	Baltic Sea	Dar_99	08.06. + 15.06. +18.06.	127	[54.50822, 12.51363]	11.0168	12.445	18.82	6.11	93.2118	1.65512	27.0756	29359665	29249453	0.9369
2005	Darss	Baltic Sea	Dar_05	14.06. + 27.06.	40	[54.50822, 12.51363]	13.6248	12.905	18.88	6.34	157.452	2.985	32	29155672	28950145	0.9393
2010	Darss	Baltic Sea	Dar_10	04.07. + 11.07.	65	[54.50822, 12.51363]	13.5458	11.91	19.05	6.58	109.978	2.38923	28.0615	29575577	29497863	0.9517
2012	Darss	Baltic Sea	Dar_12	28.06. + 08.06. + 20.07. + 28.07.	106	[54.50822, 12.51363]	14.6616	12.885	17.98	6.78	59.2208	1.24528	23.5613	80220577	79659830	0.9418
2017	Darss	Baltic Sea	Dar_17	17.-20.07.	47	[54.50822, 12.51363]	16.5282	14.41	17.15	6.58	67.5319	1.09085	24.9681	31481547	31350503	0.9374
2019	Darss	Baltic Sea	Dar_19	21.06. + 28.06. + 10.07.	43	[54.50822, 12.51363]	15.8636	13.545	18.39	8.8	76.2233	1.49756	24.8256	52623862	52430607	0.9352
2021	Darss	Baltic Sea	Dar_21	22.06. + 24.06.	49	[54.50822, 12.51363]	15.1207	13.325	19.86	6.89	78.2633	NA	26.1735	45118244	44966789	0.944
1994	Meldorf Bay	North Sea	Mel_94	24.05.	177	[54.06737, 8.888598]	14.713	15.135	23.57	10.66	51.452	2.03429	20.3548	31153482	31028416	0.9457
1999	Meldorf Bay	North Sea	Mel_99	10.05.	163	[54.06737, 8.888598]	12.112	16.785	20.91	11.83	39.1337	1.57178	18.6871	38035988	37942918	0.9479
2005	Meldorf Bay	North Sea	Mel_05	09./10.05. + 20.05.	72	[54.06737, 8.888598]	11.621	15.55	21.2	10.14	35.8972	1.39861	18.125	28512786	28401937	0.9475
2010	Meldorf Bay	North Sea	Mel_10	03.05. + 09.05. + 31.05.	219	[54.06737, 8.888598]	11.5003	16.22	22.84	10.15	32.2406	1.05479	18.1096	32665790	32514138	0.9433
2012	Meldorf Bay	North Sea	Mel_12	03.-06.05. + 22.05.	309	[54.06737, 8.888598]	11.772	15.825	19.68	10.7	27.5298	0.8945	17.767	32034397	31904138	0.9443
2017	Meldorf Bay	North Sea	Mel_17	08.05. + 15.05.	157	[54.06737, 8.888598]	11.069	17.705	19.82	9.5	25.0981	0.66645	17.2134	46682565	46542769	0.9448
2019	Meldorf Bay	North Sea	Mel_19	06.05. + 13.05.	175	[54.06737, 8.888598]	11.182	17.84	21.48	10.97	24.1051	0.89781	16.9659	82865270	82411848	0.9422
2021	Meldorf Bay	North Sea	Mel_21	10.-12.05. + 16.-18.05.	120	[54.06737, 8.888598]	10.7333	17.925	21.69	8.93	34.9	NA	18.6167	30493568	30219655	0.9427
1994	Varel-Mellum	North Sea	VaM_94	10.05.	187	[54.06737, 8.888598]	12.102	15.135	23.57	10.66	33.7807	1.29293	18.0887	31410241	31301908	0.9526
1999	Varel-Mellum	North Sea	VaM_99	17.-19.05.	190	[54.06737, 8.888598]	13.545	16.785	20.91	11.83	32.5737	1.20579	18.4421	32371210	32277788	0.944
2005	Varel-Mellum	North Sea	VaM_05	02.-06.05. + 09.-12.05.	243	[54.06737, 8.888598]	11.2444	15.55	21.2	10.14	36.8601	1.32593	18.7407	30073168	29992349	0.9502
2010	Varel-Mellum	North Sea	VaM_10	04.05. + 09.05. + 23.05.	263	[54.06737, 8.888598]	11.147	16.22	22.84	10.15	30.0042	1.04046	18.4943	29559682	29379248	0.9367
2012	Varel-Mellum	North Sea	VaM_12	03.-06.05. + 11.-12.05.	269	[54.06737, 8.888598]	11.5175	15.825	19.68	10.7	32.2877	1.20967	18.6134	32414715	32273067	0.9422
2017	Varel-Mellum	North Sea	VaM_17	08.05. + 15.05.	156	[54.06737, 8.888598]	11.069	17.705	19.82	9.5	29.2282	0.82449	17.8045	31169181	31091269	0.9472
2019	Varel-Mellum	North Sea	VaM_19	06.-08.05.	157	[54.06737, 8.888598]	10.9967	17.84	21.48	10.97	26.2694	1.0604	17.621	30979380	30898667	0.9529
2021	Varel-Mellum	North Sea	VaM_21	03.-04.05.	129	[54.06737, 8.888598]	9.308	17.925	21.69	8.93	34.3566	NA	18.9535	46880974	46617931	0.9501

## Sheet: Table S2
Table S2: RNA sequencing statistics of the samples obtained from the acute heat stress experiment.
Sample ID	Tank ID	Temperature	No. of raw reads	No. of trimmed reads	Alignment rate
959-1	T7	12 °C	50622550	49883587	96.52%
959-2	T7	12 °C	49805651	49038938	96.68%
959-3	T14	12 °C	45813842	44938309	96.61%
959-4	T2	12 °C	52795711	52068208	96.17%
959-5	T16	12 °C	47840971	47145545	96.54%
959-6	T16	12 °C	47337443	46772322	95.96%
959-7	T4	18° C	48166225	47373924	96.5%
959-8	T4	18° C	47843780	46829793	96.28%
959-9	T10	18° C	49337735	48697496	95.67%
959-10	T5	18° C	48356114	46773381	95.73%
959-11	T13	18° C	49989966	49304165	96.31%
959-12	T13	18° C	46002688	45387396	95.84%

## Sheet: Table S3
Table S3:	Annotation information of the 151 genes that are differentially expressed due to heat stress and due to time.
Gene ID	Functional annotation information retreived from the eggNOG database.
g10006	apelin receptor
g10015	Myeloid-specific peroxidase
g10169	Complement component
g10609	Zinc finger CCCH-type containing 12D
g1082	IQ motif containing GTPase activating protein 1
g10827	Ezrin-like
g10860	Apolipoprotein
g11126	aarF domain containing kinase 3
g11304	cytochrome P450
g1167	Catalyzes the cleavage of the N-glycosidic bond of deoxyribonucleoside 5'-monophosphates to yield deoxyribose 5- phosphate and a purine or pyrimidine base. Deoxyribonucleoside 5'- monophosphates containing purine bases are preferred to those containing pyrimidine bases
g1172	structural constituent of cuticle
g11754	Family with sequence similarity 53 member B
g11974	Troponin T type 1 (skeletal, slow)
g12116	Tectonin beta-propeller
g12280	Forkhead box
g12681	Thioredoxin reductase 1
g12955	Intermediate filament family orphan
g13142	ATPase family, AAA
g13185	Poly (ADP-ribose) polymerase
g13629	BPI fold containing family C
g13675	GDP-mannose pyrophosphorylase B
g1375	CD74 molecule, major histocompatibility complex, class II invariant chain b
g13759	Aldehyde dehydrogenase 4 family, member A1
g13895	Low density lipoprotein receptor
g14141	ATP-binding cassette, sub-family F
g14371	ranBP-type and C3HC4-type zinc finger-containing protein
g1479	Bcl-2 adenovirus E1B
g14870	Glutathione S-transferase
g14871	Glutathione S-transferase
g14872	Glutathione S-transferase
g15486	Myosin regulatory light chain interacting protein
g15563	F-box and leucine-rich repeat protein 2
g15636	Granulins-like
g15796	Ring finger protein 139
g15861	Low density lipoprotein receptor
g15910	Glutathione S-transferase
g15911	Glutathione S-transferase
g16331	Fibrinogen-like 2
g16334	Nicotinamide phosphoribosyltransferase
g1646	Polyamine oxidase (exo-N4-amino)
g16561	Apoptosis facilitator
g16748	Phospholipase C, delta 3b
g1682	Glutamate--cysteine ligase catalytic subunit
g17003	Transmembrane protein 179B
g17275	Appr-1'-p processing enzyme
g17307	zinc ion binding
g17318	ubiquitin carboxyl-terminal hydrolase
g17516	Enolase 3, (beta, muscle)
g17520	trafficking protein particle complex
g17859	Insulin-like growth
g18081	Cytochrome b-245, beta polypeptide (chronic granulomatous disease)
g18134	coagulation factor
g18501	Belongs to the actin family
g18503	Belongs to the actin family
g1885	Regulator of microtubule dynamics
g18992	Dual specificity protein phosphatase
g19046	factor 9
g1941	Catalyzes the oxidative ring opening of 3- hydroxyanthranilate to 2-amino-3-carboxymuconate semialdehyde, which spontaneously cyclizes to quinolinate
g20240	ATP-binding cassette, sub-family F
g20430	Centrosomal protein
g20627	Myb SANT-like DNA-binding
g20879	-
g20989	Solute carrier family 7 (cationic amino acid transporter, y system), member 1
g21061	Protein phosphatase 5, catalytic subunit
g22325	Angiopoietin-like 3
g22326	dedicator of cytokinesis
g22464	Zinc finger, CCHC domain containing 11
g23001	Tubulin/FtsZ family, C-terminal domain
g23235	-
g23302	Transcriptional regulator. Recognizes and binds to the DNA sequence 5'-GCG(T G)GGGCG-3'(EGR-site) in the promoter region of target genes. Binds double-stranded target DNA, irrespective of the cytosine methylation status. Regulates the transcription of numerous target genes, and thereby plays an important role in regulating the response to growth factors, DNA damage, and ischemia. Plays a role in …
g23346	class II histocompatibility antigen gamma
g2353	Belongs to the G-protein coupled receptor 2 family
g23771	DNA binding
g24578	Circadian associated repressor of transcription
g24585	homolog subfamily A member
g24602	Serine beta-lactamase-like protein LACTB
g24754	ubiquitin-conjugating enzyme
g24756	Belongs to the Ca(2 ) cation antiporter (CaCA) (TC 2.A.19) family
g24819	Belongs to the LDH MDH superfamily
g25065	E3 ubiquitin-protein ligase
g25127	Tyrosine aminotransferase
g2513	RAB11 family interacting protein 4 (class II)
g25615	SPRY domain containing 4
g26079	Belongs to the peptidase M10A family
g2614	c-X-C motif
g26275	Spen homolog, transcriptional regulator (Drosophila)
g26469	TPX2, microtubule-associated, homolog (Xenopus laevis)
g26907	Plectin-like isoform X1
g26959	Ankyrin repeat and IBR
g27119	Si dkey-79d12.5
g27198	Sorting nexin 10b
g27269	RNA-binding protein
g2736	Ankyrin repeat and SOCS
g27450	Solute carrier family 2 (facilitated glucose transporter), member
g27523	Si ch73-22o12.1
g27576	apolipoprotein
g27726	Membrane-spanning 4-domains, subfamily A, member
g27882	Tumor protein p53 inducible nuclear protein 1
g27953	This magnesium-dependent enzyme catalyzes the hydrolysis of ATP coupled with the transport of calcium
g3112	Belongs to the actin family
g3116	Vav 1 guanine nucleotide exchange factor
g315	Belongs to the peptidase M10A family
g3293	CREB3 regulatory factor-like
g3310	Immediate early response
g3315	zinc finger of C3HC4-type, RING
g360	Belongs to the isocitrate and isopropylmalate dehydrogenases family
g384	Astacin-like metallo-endopeptidase (M12 family)
g3882	Belongs to the tropomyosin family
g4008	Transcription factor
g4011	Si ch1073-82l19.1
g4176	Essential component of the PAM complex, a complex required for the translocation of transit peptide-containing proteins from the inner membrane into the mitochondrial matrix in an ATP-dependent manner
g4308	Kelch-like
g4510	Transglutaminase 1 like 1
g4614	Cytochrome P450, family 7, subfamily A, polypeptide 1a
g462	Belongs to the small GTPase superfamily. Rho family
g4680	ring finger protein, 2
g4776	Disrupted in renal carcinoma
g4834	Interleukin-1
g4852	intraflagellar transport
g4963	Amine oxidase flavin-containing
g4968	ATP-dependent RNA helicase
g4985	Lymphocyte cytosolic plastin 1
g4998	Carboxypeptidase
g5031	Belongs to the G-protein coupled receptor 1 family
g5187	retinol dehydrogenase
g551	oligomeric golgi complex
g5570	integrin
g6020	Stress-induced-phosphoprotein 1 (Hsp70 Hsp90-organizing protein)
g6193	Junctional adhesion molecule
g6375	Belongs to the multicopper oxidase family
g6736	Transcriptional regulator. Recognizes and binds to the DNA sequence 5'-GCG(T G)GGGCG-3'(EGR-site) in the promoter region of target genes. Binds double-stranded target DNA, irrespective of the cytosine methylation status. Regulates the transcription of numerous target genes, and thereby plays an important role in regulating the response to growth factors, DNA damage, and ischemia. Plays a role in …
g6754	E3 ubiquitin-protein ligase that mediates ubiquitination and subsequent proteasomal degradation of target proteins. E3 ubiquitin ligases accept ubiquitin from an E2 ubiquitin- conjugating enzyme in the form of a thioester and then directly transfers the ubiquitin to targeted substrates
g7032	Si ch73-281f12.4
g7135	V-maf musculoaponeurotic fibrosarcoma oncogene homolog K (avian)
g7163	Insulin-like growth factor binding protein, acid labile subunit
g7651	retinol dehydrogenase
g7849	Zinc finger CCCH-type containing 7B
g8028	Stores iron in a soluble, non-toxic, readily available form. Important for iron homeostasis. Iron is taken up in the ferrous form and deposited as ferric hydroxides after oxidation
g8045	Stores iron in a soluble, non-toxic, readily available form. Important for iron homeostasis. Iron is taken up in the ferrous form and deposited as ferric hydroxides after oxidation
g8049	Stores iron in a soluble, non-toxic, readily available form. Important for iron homeostasis. Iron is taken up in the ferrous form and deposited as ferric hydroxides after oxidation
g8284	Retinoic acid receptor responder protein
g8410	Belongs to the Orn Lys Arg decarboxylase class-II family
g8507	alcohol dehydrogenase
g8604	Interferon-induced 6-16 family
g8676	Catalyzes the cleavage of glutathione into 5-oxo-L- proline and a Cys-Gly dipeptide. Acts specifically on glutathione, but not on other gamma-glutamyl peptides
g8775	Transforming acidic coiled-coil containing protein 3
g8836	(UMP-CMP) kinase 2
g8861	ATPase inhibitory factor 1b
g8871	WD repeat domain 25
g9245	Tumor necrosis factor alpha-induced protein
g9637	Strawberry notch homolog

## Sheet: Table S4
Table S4: Gene ontoloty term enrichment results for Z. viviparus heat stress responsive genes. The number of 'annotated' and 'significant' refer to the term abundance in the gene universe (i.e., all genes tested for differential expression) and in the set of differentially expressed genes, respectively. The number of 'expected' genes denote the number of genes annotated with the respective GO ter…
GO ID	Term	Annotated	Significant	Expected	p-value	Regulation	GO term category
GO:0070936	protein K48-linked ubiquitination	65	20	5.04	4.9e-08	down	BP
GO:0034497	protein localization to phagophore assembly site	13	9	1.01	5.2e-08	down	BP
GO:1903008	organelle disassembly	70	20	5.42	1.9e-07	down	BP
GO:0016567	protein ubiquitination	766	120	59.34	3.6e-07	down	BP
GO:0000422	autophagy of mitochondrion	78	22	6.04	1.8e-06	down	BP
GO:0043161	proteasome-mediated ubiquitin-dependent protein catabolic process	383	60	29.67	1.8e-06	down	BP
GO:0044804	nucleophagy	19	9	1.47	4.4e-06	down	BP
GO:0046115	guanosine catabolic process	8	6	0.62	5.2e-06	down	BP
GO:0006161	deoxyguanosine catabolic process	8	6	0.62	5.2e-06	down	BP
GO:0006148	inosine catabolic process	8	6	0.62	5.2e-06	down	BP
GO:0006149	deoxyinosine catabolic process	8	6	0.62	5.2e-06	down	BP
GO:0006738	nicotinamide riboside catabolic process	8	6	0.62	5.2e-06	down	BP
GO:0033227	dsRNA transport	9	6	0.7	1.5e-05	down	BP
GO:0000045	autophagosome assembly	92	27	7.13	2.3e-05	down	BP
GO:0044248	cellular catabolic process	2176	248	168.58	2.7e-05	down	BP
GO:0003323	type B pancreatic cell development	28	10	2.17	2.7e-05	down	BP
GO:0070979	protein K11-linked ubiquitination	34	11	2.63	3.1e-05	down	BP
GO:0034418	urate biosynthetic process	10	6	0.77	3.4e-05	down	BP
GO:0046070	dGTP metabolic process	11	6	0.85	7e-05	down	BP
GO:0051036	regulation of endosome size	8	5	0.62	0.00013	down	BP
GO:0060745	mammary gland branching involved in pregnancy	5	4	0.39	0.00017	down	BP
GO:0016236	macroautophagy	287	57	22.23	0.00018	down	BP
GO:0006183	GTP biosynthetic process	13	6	1.01	0.00023	down	BP
GO:0045579	positive regulation of B cell differentiation	24	8	1.86	0.0003	down	BP
GO:0007032	endosome organization	74	15	5.73	0.00046	down	BP
GO:0051004	regulation of lipoprotein lipase activity	20	7	1.55	0.00052	down	BP
GO:1901070	guanosine-containing compound biosynthetic process	15	6	1.16	0.00058	down	BP
GO:0070534	protein K63-linked ubiquitination	46	11	3.56	0.00061	down	BP
GO:0034356	NAD biosynthesis via nicotinamide riboside salvage pathway	21	7	1.63	0.00072	down	BP
GO:0070233	negative regulation of T cell apoptotic process	27	8	2.09	0.00074	down	BP
GO:0045739	positive regulation of DNA repair	62	13	4.8	0.00078	down	BP
GO:0043101	purine-containing compound salvage	22	7	1.7	0.00099	down	BP
GO:1904158	axonemal central apparatus assembly	7	4	0.54	0.00104	down	BP
GO:0044342	type B pancreatic cell proliferation	23	7	1.78	0.00133	down	BP
GO:0031329	regulation of cellular catabolic process	827	90	64.07	0.00135	down	BP
GO:0016482	cytosolic transport	144	22	11.16	0.00159	down	BP
GO:1903521	positive regulation of mammary gland involution	4	3	0.31	0.00175	down	BP
GO:0060058	positive regulation of apoptotic process involved in mammary gland involution	4	3	0.31	0.00175	down	BP
GO:0015937	coenzyme A biosynthetic process	8	4	0.62	0.00194	down	BP
GO:0006055	CMP-N-acetylneuraminate biosynthetic process	8	4	0.62	0.00194	down	BP
GO:0000289	nuclear-transcribed mRNA poly(A) tail shortening	32	8	2.48	0.00247	down	BP
GO:0070875	positive regulation of glycogen metabolic process	20	6	1.55	0.0032	down	BP
GO:0035022	positive regulation of Rac protein signal transduction	9	4	0.7	0.00329	down	BP
GO:0009267	cellular response to starvation	144	21	11.16	0.00357	down	BP
GO:1902895	positive regulation of miRNA transcription	34	8	2.63	0.00372	down	BP
GO:0046326	positive regulation of D-glucose import	57	11	4.42	0.00386	down	BP
GO:1904211	membrane protein proteolysis involved in retrograde protein transport, ER to cytosol	5	3	0.39	0.00412	down	BP
GO:0030242	autophagy of peroxisome	5	3	0.39	0.00412	down	BP
GO:0071332	cellular response to fructose stimulus	5	3	0.39	0.00412	down	BP
GO:0031146	SCF-dependent proteasomal ubiquitin-dependent protein catabolic process	21	6	1.63	0.0042	down	BP
GO:0019216	regulation of lipid metabolic process	411	47	31.84	0.00442	down	BP
GO:0061136	regulation of proteasomal protein catabolic process	187	25	14.49	0.00509	down	BP
GO:0045324	late endosome to vacuole transport	10	4	0.77	0.00514	down	BP
GO:0098780	response to mitochondrial depolarisation	22	6	1.7	0.0054	down	BP
GO:0071333	cellular response to glucose stimulus	172	23	13.33	0.007	down	BP
GO:0008637	apoptotic mitochondrial changes	124	18	9.61	0.00701	down	BP
GO:0002439	chronic inflammatory response to antigenic stimulus	11	4	0.85	0.00759	down	BP
GO:1904152	regulation of retrograde protein transport, ER to cytosol	11	4	0.85	0.00759	down	BP
GO:1902047	polyamine transmembrane transport	6	3	0.46	0.00776	down	BP
GO:0010606	positive regulation of cytoplasmic mRNA processing body assembly	6	3	0.46	0.00776	down	BP
GO:2000347	positive regulation of hepatocyte proliferation	6	3	0.46	0.00776	down	BP
GO:0051045	negative regulation of membrane protein ectodomain proteolysis	6	3	0.46	0.00776	down	BP
GO:0006681	galactosylceramide metabolic process	6	3	0.46	0.00776	down	BP
GO:1904380	endoplasmic reticulum mannose trimming	17	5	1.32	0.00778	down	BP
GO:0032480	negative regulation of type I interferon production	46	9	3.56	0.00785	down	BP
GO:0001916	positive regulation of T cell mediated cytotoxicity	24	6	1.86	0.00852	down	BP
GO:0000423	mitophagy	24	6	1.86	0.00852	down	BP
GO:0021591	ventricular system development	39	8	3.02	0.00894	down	BP
GO:0000209	protein polyubiquitination	297	54	23.01	0.00953	down	BP
GO:0016197	endosomal transport	238	29	18.44	0.00991	down	BP
GO:0006497	protein lipidation	91	14	7.05	0.00996	down	BP
GO:0045582	positive regulation of T cell differentiation	82	13	6.35	0.00999	down	BP
GO:0051865	protein autoubiquitination	110	16	8.52	0.01044	down	BP
GO:1904292	regulation of ERAD pathway	25	6	1.94	0.0105	down	BP
GO:0039694	viral RNA genome replication	25	6	1.94	0.0105	down	BP
GO:0033327	Leydig cell differentiation	12	4	0.93	0.0107	down	BP
GO:0046637	regulation of alpha-beta T cell differentiation	74	12	5.73	0.01094	down	BP
GO:0046638	positive regulation of alpha-beta T cell differentiation	57	10	4.42	0.01136	down	BP
GO:0042129	regulation of T cell proliferation	140	19	10.85	0.01157	down	BP
GO:1903747	regulation of establishment of protein localization to mitochondrion	41	8	3.18	0.01212	down	BP
GO:0009896	positive regulation of catabolic process	537	61	41.6	0.01258	down	BP
GO:1903749	positive regulation of establishment of protein localization to mitochondrion	26	6	2.01	0.01277	down	BP
GO:0032324	molybdopterin cofactor biosynthetic process	7	3	0.54	0.0128	down	BP
GO:0021707	cerebellar granule cell differentiation	7	3	0.54	0.0128	down	BP
GO:1900045	negative regulation of protein K63-linked ubiquitination	7	3	0.54	0.0128	down	BP
GO:0021684	cerebellar granular layer formation	7	3	0.54	0.0128	down	BP
GO:0043545	molybdopterin cofactor metabolic process	7	3	0.54	0.0128	down	BP
GO:0051005	negative regulation of lipoprotein lipase activity	7	3	0.54	0.0128	down	BP
GO:0051189	prosthetic group metabolic process	7	3	0.54	0.0128	down	BP
GO:1990418	response to insulin-like growth factor stimulus	7	3	0.54	0.0128	down	BP
GO:0031017	exocrine pancreas development	19	5	1.47	0.01284	down	BP
GO:0000381	regulation of alternative mRNA splicing, via spliceosome	50	9	3.87	0.01354	down	BP
GO:0030514	negative regulation of BMP signaling pathway	34	7	2.63	0.01386	down	BP
GO:1901799	negative regulation of proteasomal protein catabolic process	42	8	3.25	0.01398	down	BP
GO:0009895	negative regulation of catabolic process	337	40	26.11	0.01447	down	BP
GO:0016241	regulation of macroautophagy	164	21	12.71	0.01542	down	BP
GO:0045947	negative regulation of translational initiation	20	5	1.55	0.01605	down	BP
GO:0009299	mRNA transcription	28	6	2.17	0.01832	down	BP
GO:0009057	macromolecule catabolic process	1354	164	104.9	0.01889	down	BP
GO:0006978	DNA damage response, signal transduction by p53 class mediator resulting in transcription of p21 class mediator	14	4	1.08	0.01911	down	BP
GO:0045725	positive regulation of glycogen biosynthetic process	14	4	1.08	0.01911	down	BP
GO:0014909	smooth muscle cell migration	108	15	8.37	0.01914	down	BP
GO:1902915	negative regulation of protein polyubiquitination	8	3	0.62	0.01931	down	BP
GO:0035871	protein K11-linked deubiquitination	8	3	0.62	0.01931	down	BP
GO:2001223	negative regulation of neuron migration	8	3	0.62	0.01931	down	BP
GO:0009642	response to light intensity	8	3	0.62	0.01931	down	BP
GO:0033034	positive regulation of myeloid cell apoptotic process	8	3	0.62	0.01931	down	BP
GO:0090209	negative regulation of triglyceride metabolic process	8	3	0.62	0.01931	down	BP
GO:1904153	negative regulation of retrograde protein transport, ER to cytosol	8	3	0.62	0.01931	down	BP
GO:0090207	regulation of triglyceride metabolic process	45	8	3.49	0.02081	down	BP
GO:2000772	regulation of cellular senescence	29	6	2.25	0.02162	down	BP
GO:0031331	positive regulation of cellular catabolic process	417	44	32.31	0.02183	down	BP
GO:0014812	muscle cell migration	120	16	9.3	0.02263	down	BP
GO:0045786	negative regulation of cell cycle	532	54	41.22	0.02386	down	BP
GO:0006325	chromatin organization	797	77	61.75	0.02399	down	BP
GO:0035773	insulin secretion involved in cellular response to glucose stimulus	73	11	5.66	0.02416	down	BP
GO:0050994	regulation of lipid catabolic process	55	9	4.26	0.02437	down	BP
GO:0018410	C-terminal protein amino acid modification	15	4	1.16	0.0245	down	BP
GO:0042772	DNA damage response, signal transduction resulting in transcription	15	4	1.16	0.0245	down	BP
GO:0097202	activation of cysteine-type endopeptidase activity	15	4	1.16	0.0245	down	BP
GO:0046890	regulation of lipid biosynthetic process	182	22	14.1	0.02452	down	BP
GO:0097352	autophagosome maturation	38	7	2.94	0.02486	down	BP
GO:0071108	protein K48-linked deubiquitination	30	6	2.32	0.02531	down	BP
GO:0008654	phospholipid biosynthetic process	311	34	24.09	0.02574	down	BP
GO:1905953	negative regulation of lipid localization	47	8	3.64	0.02651	down	BP
GO:0006995	cellular response to nitrogen starvation	9	3	0.7	0.02732	down	BP
GO:0070862	negative regulation of protein exit from endoplasmic reticulum	9	3	0.7	0.02732	down	BP
GO:0031086	nuclear-transcribed mRNA catabolic process, deadenylation-independent decay	9	3	0.7	0.02732	down	BP
GO:0043562	cellular response to nitrogen levels	9	3	0.7	0.02732	down	BP
GO:0048671	negative regulation of collateral sprouting	9	3	0.7	0.02732	down	BP
GO:1905962	glutamatergic neuron differentiation	9	3	0.7	0.02732	down	BP
GO:0042635	positive regulation of hair cycle	9	3	0.7	0.02732	down	BP
GO:0006501	C-terminal protein lipidation	9	3	0.7	0.02732	down	BP
GO:0010971	positive regulation of G2/M transition of mitotic cell cycle	23	5	1.78	0.02875	down	BP
GO:0050995	negative regulation of lipid catabolic process	23	5	1.78	0.02875	down	BP
GO:0006895	Golgi to endosome transport	23	5	1.78	0.02875	down	BP
GO:0007034	vacuolar transport	124	19	9.61	0.0289	down	BP
GO:0031330	negative regulation of cellular catabolic process	288	34	22.31	0.02909	down	BP
GO:0009411	response to UV	144	18	11.16	0.02937	down	BP
GO:0097345	mitochondrial outer membrane permeabilization	48	8	3.72	0.02974	down	BP
GO:0006513	protein monoubiquitination	124	16	9.61	0.02975	down	BP
GO:0071599	otic vesicle development	16	4	1.24	0.03071	down	BP
GO:0045833	negative regulation of lipid metabolic process	76	11	5.89	0.03155	down	BP
GO:0001996	positive regulation of heart rate by epinephrine-norepinephrine	4	2	0.31	0.03237	down	BP
GO:0110104	mRNA alternative polyadenylation	4	2	0.31	0.03237	down	BP
GO:0035720	intraciliary anterograde transport	4	2	0.31	0.03237	down	BP
GO:0035711	T-helper 1 cell activation	4	2	0.31	0.03237	down	BP
GO:0015798	myo-inositol transport	4	2	0.31	0.03237	down	BP
GO:1903445	protein transport from ciliary membrane to plasma membrane	4	2	0.31	0.03237	down	BP
GO:0015811	L-cystine transport	4	2	0.31	0.03237	down	BP
GO:0045348	positive regulation of MHC class II biosynthetic process	4	2	0.31	0.03237	down	BP
GO:0021520	spinal cord motor neuron cell fate specification	4	2	0.31	0.03237	down	BP
GO:0021521	ventral spinal cord interneuron specification	4	2	0.31	0.03237	down	BP
GO:0061833	protein localization to tricellular tight junction	4	2	0.31	0.03237	down	BP
GO:0070676	intralumenal vesicle formation	4	2	0.31	0.03237	down	BP
GO:0048209	regulation of vesicle targeting, to, from or within Golgi	4	2	0.31	0.03237	down	BP
GO:0090071	negative regulation of ribosome biogenesis	4	2	0.31	0.03237	down	BP
GO:0009826	unidimensional cell growth	4	2	0.31	0.03237	down	BP
GO:0010980	positive regulation of vitamin D 24-hydroxylase activity	4	2	0.31	0.03237	down	BP
GO:0010979	regulation of vitamin D 24-hydroxylase activity	4	2	0.31	0.03237	down	BP
GO:0033031	positive regulation of neutrophil apoptotic process	4	2	0.31	0.03237	down	BP
GO:0097252	oligodendrocyte apoptotic process	4	2	0.31	0.03237	down	BP
GO:0001519	peptide amidation	4	2	0.31	0.03237	down	BP
GO:0038183	bile acid signaling pathway	4	2	0.31	0.03237	down	BP
GO:0060573	cell fate specification involved in pattern specification	4	2	0.31	0.03237	down	BP
GO:0010506	regulation of autophagy	350	37	27.12	0.03255	down	BP
GO:0061178	regulation of insulin secretion involved in cellular response to glucose stimulus	67	10	5.19	0.0326	down	BP
GO:0046635	positive regulation of alpha-beta T cell activation	67	10	5.19	0.0326	down	BP
GO:0032623	interleukin-2 production	67	10	5.19	0.0326	down	BP
GO:0008214	protein dealkylation	32	6	2.48	0.03389	down	BP
GO:0032369	negative regulation of lipid transport	32	6	2.48	0.03389	down	BP
GO:0006482	protein demethylation	32	6	2.48	0.03389	down	BP
GO:0051123	RNA polymerase II preinitiation complex assembly	32	6	2.48	0.03389	down	BP
GO:0032780	negative regulation of ATP-dependent activity	24	5	1.86	0.03407	down	BP
GO:0002701	negative regulation of production of molecular mediator of immune response	24	5	1.86	0.03407	down	BP
GO:2000108	positive regulation of leukocyte apoptotic process	24	5	1.86	0.03407	down	BP
GO:0008610	lipid biosynthetic process	706	68	54.7	0.03445	down	BP
GO:0010821	regulation of mitochondrion organization	157	19	12.16	0.03447	down	BP
GO:0009166	nucleotide catabolic process	157	19	12.16	0.03447	down	BP
GO:0009894	regulation of catabolic process	983	113	76.15	0.03558	down	BP
GO:0006879	intracellular iron ion homeostasis	68	10	5.27	0.03567	down	BP
GO:0032350	regulation of hormone metabolic process	41	7	3.18	0.03627	down	BP
GO:1904036	negative regulation of epithelial cell apoptotic process	41	7	3.18	0.03627	down	BP
GO:0034249	negative regulation of amide metabolic process	158	19	12.24	0.03646	down	BP
GO:0000290	deadenylation-dependent decapping of nuclear-transcribed mRNA	10	3	0.77	0.03683	down	BP
GO:1903543	positive regulation of exosomal secretion	10	3	0.77	0.03683	down	BP
GO:2000074	regulation of type B pancreatic cell development	10	3	0.77	0.03683	down	BP
GO:0071316	cellular response to nicotine	10	3	0.77	0.03683	down	BP
GO:0060896	neural plate pattern specification	10	3	0.77	0.03683	down	BP
GO:0043687	post-translational protein modification	1173	161	90.87	0.03686	down	BP
GO:1902110	positive regulation of mitochondrial membrane permeability involved in apoptotic process	50	8	3.87	0.03696	down	BP
GO:0014911	positive regulation of smooth muscle cell migration	78	11	6.04	0.03729	down	BP
GO:1901223	negative regulation of non-canonical NF-kappaB signal transduction	17	4	1.32	0.03776	down	BP
GO:0007530	sex determination	17	4	1.32	0.03776	down	BP
GO:0046634	regulation of alpha-beta T cell activation	98	13	7.59	0.03879	down	BP
GO:1904707	positive regulation of vascular associated smooth muscle cell proliferation	33	6	2.56	0.03881	down	BP
GO:0006515	protein quality control for misfolded or incompletely synthesized proteins	33	6	2.56	0.03881	down	BP
GO:0055088	lipid homeostasis	108	14	8.37	0.03893	down	BP
GO:0006641	triglyceride metabolic process	108	14	8.37	0.03893	down	BP
GO:2001244	positive regulation of intrinsic apoptotic signaling pathway	69	10	5.35	0.03894	down	BP
GO:0035136	forelimb morphogenesis	25	5	1.94	0.03997	down	BP
GO:0019433	triglyceride catabolic process	25	5	1.94	0.03997	down	BP
GO:1902751	positive regulation of cell cycle G2/M phase transition	25	5	1.94	0.03997	down	BP
GO:0006906	vesicle fusion	139	17	10.77	0.04018	down	BP
GO:0006195	purine nucleotide catabolic process	139	17	10.77	0.04018	down	BP
GO:0010948	negative regulation of cell cycle process	356	37	27.58	0.04051	down	BP
GO:0060612	adipose tissue development	42	7	3.25	0.04073	down	BP
GO:0045022	early endosome to late endosome transport	42	7	3.25	0.04073	down	BP
GO:0009268	response to pH	42	7	3.25	0.04073	down	BP
GO:0090317	negative regulation of intracellular protein transport	42	7	3.25	0.04073	down	BP
GO:0070988	demethylation	51	8	3.95	0.04098	down	BP
GO:0042098	T cell proliferation	171	20	13.25	0.04176	down	BP
GO:0006638	neutral lipid metabolic process	130	16	10.07	0.04337	down	BP
GO:0006639	acylglycerol metabolic process	130	16	10.07	0.04337	down	BP
GO:1901292	nucleoside phosphate catabolic process	172	20	13.33	0.04397	down	BP
GO:0032387	negative regulation of intracellular transport	61	9	4.73	0.04412	down	BP
GO:0046461	neutral lipid catabolic process	34	6	2.63	0.04416	down	BP
GO:0046464	acylglycerol catabolic process	34	6	2.63	0.04416	down	BP
GO:0042770	signal transduction in response to DNA damage	194	22	15.03	0.04551	down	BP
GO:0021903	rostrocaudal neural tube patterning	18	4	1.39	0.04567	down	BP
GO:0042753	positive regulation of circadian rhythm	18	4	1.39	0.04567	down	BP
GO:0097190	apoptotic signaling pathway	647	62	50.12	0.04579	down	BP
GO:0046697	decidualization	26	5	2.01	0.04644	down	BP
GO:0071218	cellular response to misfolded protein	26	5	2.01	0.04644	down	BP
GO:0045732	positive regulation of protein catabolic process	238	26	18.44	0.04697	down	BP
GO:0042102	positive regulation of T cell proliferation	81	11	6.28	0.04721	down	BP
GO:0055091	phospholipid homeostasis	11	3	0.85	0.04779	down	BP
GO:0015791	polyol transmembrane transport	11	3	0.85	0.04779	down	BP
GO:1900044	regulation of protein K63-linked ubiquitination	11	3	0.85	0.04779	down	BP
GO:0048102	autophagic cell death	11	3	0.85	0.04779	down	BP
GO:0031053	primary miRNA processing	11	3	0.85	0.04779	down	BP
GO:0045721	negative regulation of gluconeogenesis	11	3	0.85	0.04779	down	BP
GO:0090399	replicative senescence	11	3	0.85	0.04779	down	BP
GO:0060192	negative regulation of lipase activity	11	3	0.85	0.04779	down	BP
GO:2000650	negative regulation of sodium ion transmembrane transporter activity	11	3	0.85	0.04779	down	BP
GO:0006366	transcription by RNA polymerase II	1954	170	151.38	0.04824	down	BP
GO:1902686	mitochondrial outer membrane permeabilization involved in programmed cell death	53	8	4.11	0.04987	down	BP
GO:0043312	neutrophil degranulation	440	66	32.06	2e-07	up	BP
GO:0031115	negative regulation of microtubule polymerization	21	10	1.53	6.7e-07	up	BP
GO:0046034	ATP metabolic process	262	48	19.09	1.2e-06	up	BP
GO:0006911	phagocytosis, engulfment	51	17	3.72	3.6e-06	up	BP
GO:0017001	antibiotic catabolic process	36	12	2.62	5.1e-06	up	BP
GO:1900034	regulation of cellular response to heat	45	13	3.28	1.2e-05	up	BP
GO:0006119	oxidative phosphorylation	119	31	8.67	1.7e-05	up	BP
GO:0017000	antibiotic biosynthetic process	10	6	0.73	2.4e-05	up	BP
GO:0022900	electron transport chain	160	39	11.66	2.7e-05	up	BP
GO:0043315	positive regulation of neutrophil degranulation	4	4	0.29	2.8e-05	up	BP
GO:0045744	negative regulation of G protein-coupled receptor signaling pathway	55	14	4.01	2.8e-05	up	BP
GO:1902565	positive regulation of neutrophil activation	4	4	0.29	2.8e-05	up	BP
GO:0045040	protein insertion into mitochondrial outer membrane	7	5	0.51	3.8e-05	up	BP
GO:0046654	tetrahydrofolate biosynthetic process	7	5	0.51	3.8e-05	up	BP
GO:0032802	low-density lipoprotein particle receptor catabolic process	15	7	1.09	4.1e-05	up	BP
GO:0048534	hematopoietic or lymphoid organ development	662	76	48.23	4.2e-05	up	BP
GO:0044743	protein transmembrane import into intracellular organelle	37	11	2.7	4.2e-05	up	BP
GO:0071361	cellular response to ethanol	31	10	2.26	4.3e-05	up	BP
GO:0009167	purine ribonucleoside monophosphate metabolic process	242	44	17.63	4.6e-05	up	BP
GO:0009168	purine ribonucleoside monophosphate biosynthetic process	112	21	8.16	5e-05	up	BP
GO:0051131	chaperone-mediated protein complex assembly	21	8	1.53	6.6e-05	up	BP
GO:0030225	macrophage differentiation	39	11	2.84	7.3e-05	up	BP
GO:0001776	leukocyte homeostasis	91	18	6.63	8.3e-05	up	BP
GO:0034551	mitochondrial respiratory chain complex III assembly	8	5	0.58	9.4e-05	up	BP
GO:0032981	mitochondrial respiratory chain complex I assembly	61	14	4.44	9.5e-05	up	BP
GO:0045471	response to ethanol	186	35	13.55	0.00012	up	BP
GO:0014823	response to activity	119	21	8.67	0.00012	up	BP
GO:0097237	cellular response to toxic substance	221	35	16.1	0.00014	up	BP
GO:0045730	respiratory burst	29	11	2.11	0.00016	up	BP
GO:0022904	respiratory electron transport chain	97	24	7.07	0.00017	up	BP
GO:0034383	low-density lipoprotein particle clearance	36	10	2.62	0.00018	up	BP
GO:0071236	cellular response to antibiotic	167	26	12.17	0.00018	up	BP
GO:0042554	superoxide anion generation	30	9	2.19	0.0002	up	BP
GO:0050665	hydrogen peroxide biosynthetic process	14	6	1.02	0.00027	up	BP
GO:0042403	thyroid hormone metabolic process	14	6	1.02	0.00027	up	BP
GO:0006750	glutathione biosynthetic process	14	6	1.02	0.00027	up	BP
GO:0006536	glutamate metabolic process	38	10	2.77	0.00029	up	BP
GO:0045087	innate immune response	683	74	49.76	0.00032	up	BP
GO:0042407	cristae formation	32	9	2.33	0.00034	up	BP
GO:0007339	binding of sperm to zona pellucida	20	7	1.46	0.00036	up	BP
GO:0006144	purine nucleobase metabolic process	26	8	1.89	0.00037	up	BP
GO:0030593	neutrophil chemotaxis	61	13	4.44	0.00037	up	BP
GO:0017038	protein import	214	30	15.59	0.0004	up	BP
GO:0032496	response to lipopolysaccharide	348	43	25.35	0.00043	up	BP
GO:0044849	estrous cycle	21	7	1.53	0.0005	up	BP
GO:0045933	positive regulation of muscle contraction	34	9	2.48	0.00055	up	BP
GO:0043603	amide metabolic process	1043	108	75.99	0.00056	up	BP
GO:0071372	cellular response to follicle-stimulating hormone stimulus	16	6	1.17	0.00062	up	BP
GO:0070980	biphenyl catabolic process	11	5	0.8	0.00065	up	BP
GO:0052697	xenobiotic glucuronidation	11	5	0.8	0.00065	up	BP
GO:0051409	response to nitrosative stress	11	5	0.8	0.00065	up	BP
GO:0046686	response to cadmium ion	73	14	5.32	0.00069	up	BP
GO:0006968	cellular defense response	35	9	2.55	0.0007	up	BP
GO:0045453	bone resorption	65	13	4.74	0.0007	up	BP
GO:0071806	protein transmembrane transport	56	15	4.08	0.00079	up	BP
GO:0006108	malate metabolic process	7	4	0.51	0.00082	up	BP
GO:0010919	regulation of inositol phosphate biosynthetic process	12	5	0.87	0.00104	up	BP
GO:0006977	DNA damage response, signal transduction by p53 class mediator resulting in cell cycle arrest	52	11	3.79	0.00109	up	BP
GO:0042110	T cell activation	434	52	31.62	0.00111	up	BP
GO:2000984	negative regulation of ATP citrate synthase activity	4	3	0.29	0.00146	up	BP
GO:0046104	thymidine metabolic process	4	3	0.29	0.00146	up	BP
GO:0006068	ethanol catabolic process	4	3	0.29	0.00146	up	BP
GO:0060101	negative regulation of phagocytosis, engulfment	4	3	0.29	0.00146	up	BP
GO:0032077	positive regulation of deoxyribonuclease activity	8	4	0.58	0.00154	up	BP
GO:1904044	response to aldosterone	8	4	0.58	0.00154	up	BP
GO:0071474	cellular hyperosmotic response	13	5	0.95	0.00159	up	BP
GO:0007159	leukocyte cell-cell adhesion	285	35	20.76	0.0016	up	BP
GO:0051084	'de novo' post-translational protein folding	25	7	1.82	0.0016	up	BP
GO:0030193	regulation of blood coagulation	88	15	6.41	0.00161	up	BP
GO:0007229	integrin-mediated signaling pathway	97	16	7.07	0.00163	up	BP
GO:0034599	cellular response to oxidative stress	305	40	22.22	0.00167	up	BP
GO:0045454	cell redox homeostasis	64	12	4.66	0.002	up	BP
GO:0010043	response to zinc ion	48	10	3.5	0.00206	up	BP
GO:0061077	chaperone-mediated protein folding	65	12	4.74	0.00229	up	BP
GO:0006739	NADP metabolic process	41	9	2.99	0.00233	up	BP
GO:0051608	histamine transport	14	5	1.02	0.00233	up	BP
GO:1900424	regulation of defense response to bacterium	20	6	1.46	0.00235	up	BP
GO:0048041	focal adhesion assembly	83	14	6.05	0.00251	up	BP
GO:0071800	podosome assembly	27	7	1.97	0.0026	up	BP
GO:0046060	dATP metabolic process	9	4	0.66	0.00262	up	BP
GO:2000379	positive regulation of reactive oxygen species metabolic process	111	17	8.09	0.00269	up	BP
GO:0019221	cytokine-mediated signaling pathway	575	60	41.89	0.00285	up	BP
GO:0006626	protein targeting to mitochondrion	74	17	5.39	0.00286	up	BP
GO:0051017	actin filament bundle assembly	160	22	11.66	0.00287	up	BP
GO:1990776	response to angiotensin	35	8	2.55	0.00309	up	BP
GO:0002687	positive regulation of leukocyte migration	122	18	8.89	0.00311	up	BP
GO:0046148	pigment biosynthetic process	53	13	3.86	0.00321	up	BP
GO:0032042	mitochondrial DNA metabolic process	28	7	2.04	0.00325	up	BP
GO:0042364	water-soluble vitamin biosynthetic process	15	5	1.09	0.00329	up	BP
GO:0055093	response to hyperoxia	43	9	3.13	0.00329	up	BP
GO:0006120	mitochondrial electron transport, NADH to ubiquinone	43	9	3.13	0.00329	up	BP
GO:0001910	regulation of leukocyte mediated cytotoxicity	68	12	4.95	0.00339	up	BP
GO:0030098	lymphocyte differentiation	335	41	24.41	0.00343	up	BP
GO:0032053	ciliary basal body organization	5	3	0.36	0.00345	up	BP
GO:0010045	response to nickel cation	5	3	0.36	0.00345	up	BP
GO:0070541	response to platinum ion	5	3	0.36	0.00345	up	BP
GO:0019336	phenol-containing compound catabolic process	5	3	0.36	0.00345	up	BP
GO:0009155	purine deoxyribonucleotide catabolic process	5	3	0.36	0.00345	up	BP
GO:0006272	leading strand elongation	5	3	0.36	0.00345	up	BP
GO:1902990	mitotic telomere maintenance via semi-conservative replication	5	3	0.36	0.00345	up	BP
GO:0038096	Fc-gamma receptor signaling pathway involved in phagocytosis	77	13	5.61	0.0035	up	BP
GO:0008637	apoptotic mitochondrial changes	124	18	9.03	0.00372	up	BP
GO:0010389	regulation of G2/M transition of mitotic cell cycle	174	23	12.68	0.00387	up	BP
GO:0035588	G protein-coupled purinergic receptor signaling pathway	22	6	1.6	0.00398	up	BP
GO:0042219	cellular modified amino acid catabolic process	29	7	2.11	0.00401	up	BP
GO:1904851	positive regulation of establishment of protein localization to telomere	10	4	0.73	0.00412	up	BP
GO:0010248	establishment or maintenance of transmembrane electrochemical gradient	10	4	0.73	0.00412	up	BP
GO:0006782	protoporphyrinogen IX biosynthetic process	10	4	0.73	0.00412	up	BP
GO:0001514	selenocysteine incorporation	10	4	0.73	0.00412	up	BP
GO:0001523	retinoid metabolic process	61	11	4.44	0.00416	up	BP
GO:0006081	cellular aldehyde metabolic process	70	12	5.1	0.00434	up	BP
GO:2000573	positive regulation of DNA biosynthetic process	71	12	5.17	0.00488	up	BP
GO:0031100	animal organ regeneration	147	20	10.71	0.00491	up	BP
GO:0097066	response to thyroid hormone	48	11	3.5	0.00521	up	BP
GO:0038094	Fc-gamma receptor signaling pathway	79	15	5.76	0.00521	up	BP
GO:0046501	protoporphyrinogen IX metabolic process	12	6	0.87	0.00526	up	BP
GO:0006418	tRNA aminoacylation for protein translation	46	9	3.35	0.00528	up	BP
GO:2001243	negative regulation of intrinsic apoptotic signaling pathway	90	14	6.56	0.00535	up	BP
GO:0006955	immune response	1535	174	111.83	0.00537	up	BP
GO:0032388	positive regulation of intracellular transport	200	25	14.57	0.00558	up	BP
GO:0002250	adaptive immune response	313	40	22.8	0.00565	up	BP
GO:0060249	anatomical structure homeostasis	321	43	23.39	0.00573	up	BP
GO:1901698	response to nitrogen compound	1239	121	90.27	0.00584	up	BP
GO:0048247	lymphocyte chemotaxis	31	7	2.26	0.00596	up	BP
GO:0010954	positive regulation of protein processing	31	7	2.26	0.00596	up	BP
GO:0044794	positive regulation by host of viral process	17	5	1.24	0.006	up	BP
GO:1903578	regulation of ATP metabolic process	82	13	5.97	0.00607	up	BP
GO:0030573	bile acid catabolic process	11	4	0.8	0.0061	up	BP
GO:0061684	chaperone-mediated autophagy	11	4	0.8	0.0061	up	BP
GO:0002679	respiratory burst involved in defense response	11	4	0.8	0.0061	up	BP
GO:0006122	mitochondrial electron transport, ubiquinol to cytochrome c	11	4	0.8	0.0061	up	BP
GO:0065002	intracellular protein transmembrane transport	47	9	3.42	0.00612	up	BP
GO:0010833	telomere maintenance via telomere lengthening	73	12	5.32	0.00614	up	BP
GO:0033628	regulation of cell adhesion mediated by integrin	39	8	2.84	0.00623	up	BP
GO:0007169	cell surface receptor protein tyrosine kinase signaling pathway	667	66	48.59	0.00627	up	BP
GO:0070327	thyroid hormone transport	6	3	0.44	0.00652	up	BP
GO:1905323	telomerase holoenzyme complex assembly	6	3	0.44	0.00652	up	BP
GO:0009812	flavonoid metabolic process	6	3	0.44	0.00652	up	BP
GO:0009608	response to symbiont	6	3	0.44	0.00652	up	BP
GO:0009410	response to xenobiotic stimulus	368	44	26.81	0.00654	up	BP
GO:0050766	positive regulation of phagocytosis	65	11	4.74	0.00683	up	BP
GO:0006278	RNA-templated DNA biosynthetic process	65	11	4.74	0.00683	up	BP
GO:0042743	hydrogen peroxide metabolic process	46	13	3.35	0.00694	up	BP
GO:2000401	regulation of lymphocyte migration	48	9	3.5	0.00706	up	BP
GO:0071402	cellular response to lipoprotein particle stimulus	32	7	2.33	0.00715	up	BP
GO:0006298	mismatch repair	32	7	2.33	0.00715	up	BP
GO:0051290	protein heterotetramerization	32	7	2.33	0.00715	up	BP
GO:0030042	actin filament depolymerization	57	10	4.15	0.00751	up	BP
GO:0051674	localization of cell	817	78	59.52	0.00759	up	BP
GO:0006954	inflammatory response	566	64	41.24	0.00763	up	BP
GO:0045117	azole transmembrane transport	18	5	1.31	0.00781	up	BP
GO:0019430	removal of superoxide radicals	18	5	1.31	0.00781	up	BP
GO:0090330	regulation of platelet aggregation	18	5	1.31	0.00781	up	BP
GO:0006730	one-carbon metabolic process	25	6	1.82	0.00784	up	BP
GO:0019886	antigen processing and presentation of exogenous peptide antigen via MHC class II	85	13	6.19	0.00823	up	BP
GO:0002709	regulation of T cell mediated immunity	58	10	4.23	0.0085	up	BP
GO:0030890	positive regulation of B cell proliferation	33	7	2.4	0.00852	up	BP
GO:0051412	response to corticosterone	33	7	2.4	0.00852	up	BP
GO:1902947	regulation of tau-protein kinase activity	12	4	0.87	0.00863	up	BP
GO:1901857	positive regulation of cellular respiration	12	4	0.87	0.00863	up	BP
GO:0010359	regulation of anion channel activity	12	4	0.87	0.00863	up	BP
GO:0070255	regulation of mucus secretion	12	4	0.87	0.00863	up	BP
GO:0106074	aminoacyl-tRNA metabolism involved in translational fidelity	12	4	0.87	0.00863	up	BP
GO:1990542	mitochondrial transmembrane transport	95	14	6.92	0.00865	up	BP
GO:0030833	regulation of actin filament polymerization	145	19	10.56	0.00896	up	BP
GO:0009408	response to heat	142	27	10.35	0.00941	up	BP
GO:0046677	response to antibiotic	423	55	30.82	0.00943	up	BP
GO:1902105	regulation of leukocyte differentiation	263	30	19.16	0.0095	up	BP
GO:0002269	leukocyte activation involved in inflammatory response	26	6	1.89	0.00958	up	BP
GO:0015985	energy coupled proton transport, down electrochemical gradient	26	6	1.89	0.00958	up	BP
GO:0097242	amyloid-beta clearance	26	6	1.89	0.00958	up	BP
GO:0051099	positive regulation of binding	209	25	15.23	0.00965	up	BP
GO:1903426	regulation of reactive oxygen species biosynthetic process	106	15	7.72	0.00971	up	BP
GO:0032680	regulation of tumor necrosis factor production	116	16	8.45	0.00982	up	BP
GO:0009152	purine ribonucleotide biosynthetic process	251	32	18.29	0.00992	up	BP
GO:0002688	regulation of leukocyte chemotaxis	87	13	6.34	0.00997	up	BP
GO:0071394	cellular response to testosterone stimulus	19	5	1.38	0.00998	up	BP
GO:0042276	error-prone translesion synthesis	19	5	1.38	0.00998	up	BP
GO:0170044	non-proteinogenic amino acid catabolic process	19	5	1.38	0.00998	up	BP
GO:0042776	proton motive force-driven mitochondrial ATP synthesis	19	5	1.38	0.00998	up	BP
GO:0002705	positive regulation of leukocyte mediated immunity	121	20	8.82	0.01023	up	BP
GO:0002708	positive regulation of lymphocyte mediated immunity	97	14	7.07	0.01034	up	BP
GO:0030834	regulation of actin filament depolymerization	51	9	3.72	0.01054	up	BP
GO:0002532	production of molecular mediator involved in inflammatory response	51	9	3.72	0.01054	up	BP
GO:0050867	positive regulation of cell activation	305	41	22.22	0.01077	up	BP
GO:0038083	peptidyl-tyrosine autophosphorylation	60	10	4.37	0.01077	up	BP
GO:0018171	peptidyl-cysteine oxidation	7	3	0.51	0.0108	up	BP
GO:0033625	positive regulation of integrin activation	7	3	0.51	0.0108	up	BP
GO:0032803	regulation of low-density lipoprotein particle receptor catabolic process	7	3	0.51	0.0108	up	BP
GO:0043504	mitochondrial DNA repair	7	3	0.51	0.0108	up	BP
GO:1900425	negative regulation of defense response to bacterium	7	3	0.51	0.0108	up	BP
GO:0052803	imidazole-containing compound metabolic process	7	3	0.51	0.0108	up	BP
GO:0042447	hormone catabolic process	7	3	0.51	0.0108	up	BP
GO:0010985	negative regulation of lipoprotein particle clearance	7	3	0.51	0.0108	up	BP
GO:0033023	mast cell homeostasis	7	3	0.51	0.0108	up	BP
GO:0033024	mast cell apoptotic process	7	3	0.51	0.0108	up	BP
GO:0033025	regulation of mast cell apoptotic process	7	3	0.51	0.0108	up	BP
GO:0006189	'de novo' IMP biosynthetic process	7	3	0.51	0.0108	up	BP
GO:0014831	gastro-intestinal system smooth muscle contraction	7	3	0.51	0.0108	up	BP
GO:0006547	L-histidine metabolic process	7	3	0.51	0.0108	up	BP
GO:0170040	proteinogenic amino acid catabolic process	88	13	6.41	0.01094	up	BP
GO:0071480	cellular response to gamma radiation	27	6	1.97	0.01157	up	BP
GO:0007028	cytoplasm organization	13	4	0.95	0.01175	up	BP
GO:0061635	regulation of protein complex stability	13	4	0.95	0.01175	up	BP
GO:0032959	inositol trisphosphate biosynthetic process	13	4	0.95	0.01175	up	BP
GO:0006123	mitochondrial electron transport, cytochrome c to oxygen	13	4	0.95	0.01175	up	BP
GO:0001821	histamine secretion	13	4	0.95	0.01175	up	BP
GO:0050881	musculoskeletal movement	35	7	2.55	0.01182	up	BP
GO:0050879	multicellular organismal movement	35	7	2.55	0.01182	up	BP
GO:0006790	sulfur compound metabolic process	362	43	26.37	0.01183	up	BP
GO:1901652	response to peptide	1427	138	103.96	0.01193	up	BP
GO:0046112	nucleobase biosynthetic process	20	5	1.46	0.01253	up	BP
GO:0051900	regulation of mitochondrial depolarization	20	5	1.46	0.01253	up	BP
GO:0070987	error-free translesion synthesis	20	5	1.46	0.01253	up	BP
GO:0020027	hemoglobin metabolic process	20	5	1.46	0.01253	up	BP
GO:0071801	regulation of podosome assembly	20	5	1.46	0.01253	up	BP
GO:1904589	regulation of protein import	80	12	5.83	0.01263	up	BP
GO:1903557	positive regulation of tumor necrosis factor superfamily cytokine production	80	12	5.83	0.01263	up	BP
GO:0072347	response to anesthetic	90	13	6.56	0.01311	up	BP
GO:0170035	L-amino acid catabolic process	90	13	6.56	0.01311	up	BP
GO:0043279	response to alkaloid	130	17	9.47	0.01323	up	BP
GO:0050863	regulation of T cell activation	281	31	20.47	0.01335	up	BP
GO:0002824	positive regulation of adaptive immune response based on somatic recombination of immune receptors built from immunoglobulin superfamily domains	100	14	7.29	0.01337	up	BP
GO:0051653	spindle localization	53	9	3.86	0.01349	up	BP
GO:0030217	T cell differentiation	241	30	17.56	0.01378	up	BP
GO:0150117	positive regulation of cell-substrate junction organization	28	6	2.04	0.01384	up	BP
GO:0009065	glutamine family amino acid catabolic process	28	6	2.04	0.01384	up	BP
GO:0042402	cellular biogenic amine catabolic process	28	6	2.04	0.01384	up	BP
GO:1902624	positive regulation of neutrophil migration	28	6	2.04	0.01384	up	BP
GO:0051894	positive regulation of focal adhesion assembly	28	6	2.04	0.01384	up	BP
GO:0044093	positive regulation of molecular function	1716	158	125.02	0.0139	up	BP
GO:0009123	nucleoside monophosphate metabolic process	271	50	19.74	0.01421	up	BP
GO:2000106	regulation of leukocyte apoptotic process	101	14	7.36	0.01451	up	BP
GO:0042775	mitochondrial ATP synthesis coupled electron transport	75	18	5.46	0.01483	up	BP
GO:0046685	response to arsenic-containing substance	45	8	3.28	0.01485	up	BP
GO:0008154	actin polymerization or depolymerization	206	30	15.01	0.01497	up	BP
GO:0006909	phagocytosis	248	45	18.07	0.01521	up	BP
GO:0002696	positive regulation of leukocyte activation	290	39	21.13	0.01547	up	BP
GO:0033622	integrin activation	21	5	1.53	0.01548	up	BP
GO:1902065	response to L-glutamate	21	5	1.53	0.01548	up	BP
GO:0090023	positive regulation of neutrophil chemotaxis	21	5	1.53	0.01548	up	BP
GO:0051016	barbed-end actin filament capping	21	5	1.53	0.01548	up	BP
GO:0003009	skeletal muscle contraction	21	5	1.53	0.01548	up	BP
GO:0071624	positive regulation of granulocyte chemotaxis	21	5	1.53	0.01548	up	BP
GO:0006534	cysteine metabolic process	21	5	1.53	0.01548	up	BP
GO:0033631	cell-cell adhesion mediated by integrin	14	4	1.02	0.01552	up	BP
GO:0030150	protein import into mitochondrial matrix	14	4	1.02	0.01552	up	BP
GO:0009113	purine nucleobase biosynthetic process	14	4	1.02	0.01552	up	BP
GO:0043605	amide catabolic process	14	4	1.02	0.01552	up	BP
GO:0007006	mitochondrial membrane organization	140	26	10.2	0.01564	up	BP
GO:0030031	cell projection assembly	576	56	41.96	0.01569	up	BP
GO:0032092	positive regulation of protein binding	112	15	8.16	0.0157	up	BP
GO:0050921	positive regulation of chemotaxis	112	15	8.16	0.0157	up	BP
GO:0097711	ciliary basal body-plasma membrane docking	112	15	8.16	0.0157	up	BP
GO:0002715	regulation of natural killer cell mediated immunity	37	7	2.7	0.01595	up	BP
GO:2000404	regulation of T cell migration	37	7	2.7	0.01595	up	BP
GO:0042269	regulation of natural killer cell mediated cytotoxicity	37	7	2.7	0.01595	up	BP
GO:0002690	positive regulation of leukocyte chemotaxis	73	11	5.32	0.01603	up	BP
GO:0002523	leukocyte migration involved in inflammatory response	10	5	0.73	0.01626	up	BP
GO:0006518	peptide metabolic process	487	53	35.48	0.01634	up	BP
GO:1902949	positive regulation of tau-protein kinase activity	8	3	0.58	0.01635	up	BP
GO:0033632	regulation of cell-cell adhesion mediated by integrin	8	3	0.58	0.01635	up	BP
GO:0070358	actin polymerization-dependent cell motility	8	3	0.58	0.01635	up	BP
GO:1901685	glutathione derivative metabolic process	8	3	0.58	0.01635	up	BP
GO:1901687	glutathione derivative biosynthetic process	8	3	0.58	0.01635	up	BP
GO:0071472	cellular response to salt stress	8	3	0.58	0.01635	up	BP
GO:1903978	regulation of microglial cell activation	8	3	0.58	0.01635	up	BP
GO:0071873	response to norepinephrine	8	3	0.58	0.01635	up	BP
GO:0006287	base-excision repair, gap-filling	8	3	0.58	0.01635	up	BP
GO:0150077	regulation of neuroinflammatory response	8	3	0.58	0.01635	up	BP
GO:0055094	response to lipoprotein particle	29	6	2.11	0.01641	up	BP
GO:0045742	positive regulation of epidermal growth factor receptor signaling pathway	29	6	2.11	0.01641	up	BP
GO:0009310	amine catabolic process	29	6	2.11	0.01641	up	BP
GO:1904385	cellular response to angiotensin	29	6	2.11	0.01641	up	BP
GO:0050821	protein stabilization	186	22	13.55	0.01643	up	BP
GO:0007004	telomere maintenance via telomerase	64	10	4.66	0.01667	up	BP
GO:0009145	purine nucleoside triphosphate biosynthetic process	153	22	11.15	0.01684	up	BP
GO:0006734	NADH metabolic process	46	8	3.35	0.01687	up	BP
GO:1902107	positive regulation of leukocyte differentiation	144	18	10.49	0.01698	up	BP
GO:0048010	vascular endothelial growth factor receptor signaling pathway	103	14	7.5	0.01703	up	BP
GO:0002449	lymphocyte mediated immunity	203	28	14.79	0.01703	up	BP
GO:0050920	regulation of chemotaxis	152	23	11.07	0.01757	up	BP
GO:0050865	regulation of cell activation	475	58	34.61	0.01795	up	BP
GO:0042773	ATP synthesis coupled electron transport	76	18	5.54	0.01809	up	BP
GO:0071887	leukocyte apoptotic process	114	15	8.31	0.01823	up	BP
GO:0006099	tricarboxylic acid cycle	38	7	2.77	0.01836	up	BP
GO:0045333	cellular respiration	221	50	16.1	0.0185	up	BP
GO:1902932	positive regulation of alcohol biosynthetic process	22	5	1.6	0.01886	up	BP
GO:0014912	negative regulation of smooth muscle cell migration	22	5	1.6	0.01886	up	BP
GO:0061756	leukocyte adhesion to vascular endothelial cell	22	5	1.6	0.01886	up	BP
GO:0033005	positive regulation of mast cell activation	22	5	1.6	0.01886	up	BP
GO:0032673	regulation of interleukin-4 production	22	5	1.6	0.01886	up	BP
GO:0000096	sulfur amino acid metabolic process	47	8	3.42	0.01907	up	BP
GO:0045123	cellular extravasation	47	8	3.42	0.01907	up	BP
GO:0072678	T cell migration	47	8	3.42	0.01907	up	BP
GO:0061013	regulation of mRNA catabolic process	178	21	12.97	0.01926	up	BP
GO:0043487	regulation of RNA stability	178	21	12.97	0.01926	up	BP
GO:1903393	positive regulation of adherens junction organization	30	6	2.19	0.01928	up	BP
GO:0032620	interleukin-17 production	30	6	2.19	0.01928	up	BP
GO:0071466	cellular response to xenobiotic stimulus	212	28	15.45	0.01957	up	BP
GO:0034097	response to cytokine	1013	103	73.8	0.01958	up	BP
GO:0001101	response to acid chemical	455	47	33.15	0.01968	up	BP
GO:0043200	response to amino acid	170	22	12.39	0.01973	up	BP
GO:0046209	nitric oxide metabolic process	85	12	6.19	0.01982	up	BP
GO:0032570	response to progesterone	85	12	6.19	0.01982	up	BP
GO:0043244	regulation of protein-containing complex disassembly	105	14	7.65	0.01987	up	BP
GO:0031342	negative regulation of cell killing	15	4	1.09	0.01997	up	BP
GO:0006098	pentose-phosphate shunt	15	4	1.09	0.01997	up	BP
GO:0042744	hydrogen peroxide catabolic process	15	4	1.09	0.01997	up	BP
GO:0071803	positive regulation of podosome assembly	15	4	1.09	0.01997	up	BP
GO:0038166	angiotensin-activated signaling pathway	15	4	1.09	0.01997	up	BP
GO:0043488	regulation of mRNA stability	168	20	12.24	0.02014	up	BP
GO:0007162	negative regulation of cell adhesion	234	26	17.05	0.02039	up	BP
GO:0033003	regulation of mast cell activation	39	7	2.84	0.02102	up	BP
GO:1904356	regulation of telomere maintenance via telomere lengthening	57	9	4.15	0.02116	up	BP
GO:0045428	regulation of nitric oxide biosynthetic process	76	11	5.54	0.02119	up	BP
GO:0002228	natural killer cell mediated immunity	48	8	3.5	0.02148	up	BP
GO:0042267	natural killer cell mediated cytotoxicity	48	8	3.5	0.02148	up	BP
GO:0006749	glutathione metabolic process	45	12	3.28	0.02192	up	BP
GO:0002260	lymphocyte homeostasis	67	10	4.88	0.02245	up	BP
GO:1901186	positive regulation of ERBB signaling pathway	31	6	2.26	0.02248	up	BP
GO:0043304	regulation of mast cell degranulation	31	6	2.26	0.02248	up	BP
GO:0002369	T cell cytokine production	31	6	2.26	0.02248	up	BP
GO:0033006	regulation of mast cell activation involved in immune response	31	6	2.26	0.02248	up	BP
GO:0045056	transcytosis	25	7	1.82	0.0225	up	BP
GO:0016999	antibiotic metabolic process	124	29	9.03	0.02258	up	BP
GO:0045987	positive regulation of smooth muscle contraction	23	5	1.68	0.02269	up	BP
GO:0006297	nucleotide-excision repair, DNA gap filling	23	5	1.68	0.02269	up	BP
GO:0046651	lymphocyte proliferation	226	29	16.47	0.02284	up	BP
GO:0032943	mononuclear cell proliferation	226	29	16.47	0.02284	up	BP
GO:0006839	mitochondrial transport	241	36	17.56	0.02292	up	BP
GO:0080164	regulation of nitric oxide metabolic process	77	11	5.61	0.02316	up	BP
GO:0033591	response to L-ascorbic acid	9	3	0.66	0.02322	up	BP
GO:0099515	actin filament-based transport	9	3	0.66	0.02322	up	BP
GO:0097048	dendritic cell apoptotic process	9	3	0.66	0.02322	up	BP
GO:0045989	positive regulation of striated muscle contraction	9	3	0.66	0.02322	up	BP
GO:0001820	serotonin secretion	9	3	0.66	0.02322	up	BP
GO:2000668	regulation of dendritic cell apoptotic process	9	3	0.66	0.02322	up	BP
GO:0060732	positive regulation of inositol phosphate biosynthetic process	9	3	0.66	0.02322	up	BP
GO:0006590	thyroid hormone generation	9	3	0.66	0.02322	up	BP
GO:0006538	glutamate catabolic process	9	3	0.66	0.02322	up	BP
GO:0043085	positive regulation of catalytic activity	1350	120	98.35	0.02338	up	BP
GO:0031960	response to corticosteroid	269	36	19.6	0.02367	up	BP
GO:0009142	nucleoside triphosphate biosynthetic process	169	23	12.31	0.02381	up	BP
GO:0042098	T cell proliferation	171	20	12.46	0.02391	up	BP
GO:2001222	regulation of neuron migration	40	7	2.91	0.02393	up	BP
GO:0032206	positive regulation of telomere maintenance	49	8	3.57	0.02408	up	BP
GO:1903039	positive regulation of leukocyte cell-cell adhesion	193	22	14.06	0.02409	up	BP
GO:0120031	plasma membrane bounded cell projection assembly	567	54	41.31	0.02492	up	BP
GO:0006754	ATP biosynthetic process	138	20	10.05	0.02506	up	BP
GO:0060359	response to ammonium ion	129	16	9.4	0.02508	up	BP
GO:0043306	positive regulation of mast cell degranulation	16	4	1.17	0.02513	up	BP
GO:0032753	positive regulation of interleukin-4 production	16	4	1.17	0.02513	up	BP
GO:0033008	positive regulation of mast cell activation involved in immune response	16	4	1.17	0.02513	up	BP
GO:0003085	negative regulation of systemic arterial blood pressure	16	4	1.17	0.02513	up	BP
GO:1901879	regulation of protein depolymerization	78	11	5.68	0.02525	up	BP
GO:2001057	reactive nitrogen species metabolic process	88	12	6.41	0.02539	up	BP
GO:0008210	estrogen metabolic process	32	6	2.33	0.02602	up	BP
GO:0008209	androgen metabolic process	32	6	2.33	0.02602	up	BP
GO:0090322	regulation of superoxide metabolic process	32	6	2.33	0.02602	up	BP
GO:0006457	protein folding	202	30	14.72	0.02621	up	BP
GO:0002821	positive regulation of adaptive immune response	109	14	7.94	0.02661	up	BP
GO:0002694	regulation of leukocyte activation	431	50	31.4	0.02696	up	BP
GO:0006958	complement activation, classical pathway	24	5	1.75	0.02699	up	BP
GO:0010831	positive regulation of myotube differentiation	24	5	1.75	0.02699	up	BP
GO:0032928	regulation of superoxide anion generation	24	5	1.75	0.02699	up	BP
GO:0046847	filopodium assembly	69	10	5.03	0.02704	up	BP
GO:0050727	regulation of inflammatory response	301	34	21.93	0.02705	up	BP
GO:0035722	interleukin-12-mediated signaling pathway	41	7	2.99	0.0271	up	BP
GO:0071349	cellular response to interleukin-12	41	7	2.99	0.0271	up	BP
GO:0010522	regulation of calcium ion transport into cytosol	89	12	6.48	0.02748	up	BP
GO:0032760	positive regulation of tumor necrosis factor production	79	11	5.76	0.02748	up	BP
GO:0002274	myeloid leukocyte activation	565	81	41.16	0.02771	up	BP
GO:0045088	regulation of innate immune response	321	33	23.39	0.02794	up	BP
GO:0042119	neutrophil activation	450	69	32.78	0.02817	up	BP
GO:0046822	regulation of nucleocytoplasmic transport	131	16	9.54	0.02849	up	BP
GO:1901606	alpha-amino acid catabolic process	110	14	8.01	0.02853	up	BP
GO:0035590	purinergic nucleotide receptor signaling pathway	26	8	1.89	0.02854	up	BP
GO:0016310	phosphorylation	2070	176	150.81	0.02857	up	BP
GO:0033512	L-lysine catabolic process to acetyl-CoA via saccharopine	4	2	0.29	0.02881	up	BP
GO:0070494	regulation of thrombin-activated receptor signaling pathway	4	2	0.29	0.02881	up	BP
GO:0070495	negative regulation of thrombin-activated receptor signaling pathway	4	2	0.29	0.02881	up	BP
GO:1901529	positive regulation of anion channel activity	4	2	0.29	0.02881	up	BP
GO:0015722	canalicular bile acid transport	4	2	0.29	0.02881	up	BP
GO:0061740	protein targeting to lysosome involved in chaperone-mediated autophagy	4	2	0.29	0.02881	up	BP
GO:0032765	positive regulation of mast cell cytokine production	4	2	0.29	0.02881	up	BP
GO:0010133	proline catabolic process to glutamate	4	2	0.29	0.02881	up	BP
GO:1903797	positive regulation of inorganic anion transmembrane transport	4	2	0.29	0.02881	up	BP
GO:0009447	putrescine catabolic process	4	2	0.29	0.02881	up	BP
GO:0009146	purine nucleoside triphosphate catabolic process	4	2	0.29	0.02881	up	BP
GO:0002554	serotonin secretion by platelet	4	2	0.29	0.02881	up	BP
GO:0002536	respiratory burst involved in inflammatory response	4	2	0.29	0.02881	up	BP
GO:0009256	10-formyltetrahydrofolate metabolic process	4	2	0.29	0.02881	up	BP
GO:1900126	negative regulation of hyaluronan biosynthetic process	4	2	0.29	0.02881	up	BP
GO:0034144	negative regulation of toll-like receptor 4 signaling pathway	4	2	0.29	0.02881	up	BP
GO:0007509	mesoderm migration involved in gastrulation	4	2	0.29	0.02881	up	BP
GO:0071461	cellular response to redox state	4	2	0.29	0.02881	up	BP
GO:2000481	positive regulation of cAMP-dependent protein kinase activity	4	2	0.29	0.02881	up	BP
GO:0019853	L-ascorbic acid biosynthetic process	4	2	0.29	0.02881	up	BP
GO:2000182	regulation of progesterone biosynthetic process	4	2	0.29	0.02881	up	BP
GO:0009609	response to symbiotic bacterium	4	2	0.29	0.02881	up	BP
GO:0060278	regulation of ovulation	4	2	0.29	0.02881	up	BP
GO:0060279	positive regulation of ovulation	4	2	0.29	0.02881	up	BP
GO:0006742	NADP catabolic process	4	2	0.29	0.02881	up	BP
GO:0016237	microautophagy	4	2	0.29	0.02881	up	BP
GO:2000670	positive regulation of dendritic cell apoptotic process	4	2	0.29	0.02881	up	BP
GO:1901336	lactone biosynthetic process	4	2	0.29	0.02881	up	BP
GO:0033239	negative regulation of amine metabolic process	4	2	0.29	0.02881	up	BP
GO:0009060	aerobic respiration	171	39	12.46	0.02899	up	BP
GO:0000302	response to reactive oxygen species	272	32	19.82	0.02905	up	BP
GO:0016064	immunoglobulin mediated immune response	100	13	7.29	0.02922	up	BP
GO:0009206	purine ribonucleoside triphosphate biosynthetic process	151	21	11	0.02932	up	BP
GO:0008360	regulation of cell shape	153	18	11.15	0.02945	up	BP
GO:0051606	detection of stimulus	175	20	12.75	0.02974	up	BP
GO:0048013	ephrin receptor signaling pathway	80	11	5.83	0.02985	up	BP
GO:0051693	actin filament capping	33	6	2.4	0.02991	up	BP
GO:0071526	semaphorin-plexin signaling pathway	33	6	2.4	0.02991	up	BP
GO:0019748	secondary metabolic process	51	8	3.72	0.02995	up	BP
GO:0002699	positive regulation of immune effector process	180	24	13.11	0.03015	up	BP
GO:0045580	regulation of T cell differentiation	132	16	9.62	0.03032	up	BP
GO:1901799	negative regulation of proteasomal protein catabolic process	42	7	3.06	0.03055	up	BP
GO:0030865	cortical cytoskeleton organization	42	7	3.06	0.03055	up	BP
GO:0002455	humoral immune response mediated by circulating immunoglobulin	42	7	3.06	0.03055	up	BP
GO:0006767	water-soluble vitamin metabolic process	76	14	5.54	0.03076	up	BP
GO:1990845	adaptive thermogenesis	17	4	1.24	0.03101	up	BP
GO:0050901	leukocyte tethering or rolling	17	4	1.24	0.03101	up	BP
GO:0006740	NADPH regeneration	17	4	1.24	0.03101	up	BP
GO:0007005	mitochondrion organization	526	80	38.32	0.03125	up	BP
GO:0046364	monosaccharide biosynthetic process	101	13	7.36	0.03139	up	BP
GO:0035744	T-helper 1 cell cytokine production	10	3	0.73	0.0314	up	BP
GO:0044829	positive regulation by host of viral genome replication	10	3	0.73	0.0314	up	BP
GO:1901856	negative regulation of cellular respiration	10	3	0.73	0.0314	up	BP
GO:0035589	G protein-coupled purinergic nucleotide receptor signaling pathway	10	3	0.73	0.0314	up	BP
GO:0002349	histamine production involved in inflammatory response	10	3	0.73	0.0314	up	BP
GO:0002441	histamine secretion involved in inflammatory response	10	3	0.73	0.0314	up	BP
GO:0090084	negative regulation of inclusion body assembly	10	3	0.73	0.0314	up	BP
GO:0002553	histamine secretion by mast cell	10	3	0.73	0.0314	up	BP
GO:0071317	cellular response to isoquinoline alkaloid	10	3	0.73	0.0314	up	BP
GO:0042438	melanin biosynthetic process	10	3	0.73	0.0314	up	BP
GO:0019852	L-ascorbic acid metabolic process	10	3	0.73	0.0314	up	BP
GO:0008078	mesodermal cell migration	10	3	0.73	0.0314	up	BP
GO:1901334	lactone metabolic process	10	3	0.73	0.0314	up	BP
GO:0048675	axon extension	122	15	8.89	0.03153	up	BP
GO:0032272	negative regulation of protein polymerization	73	18	5.32	0.03159	up	BP
GO:0051384	response to glucocorticoid	255	31	18.58	0.03166	up	BP
GO:0009651	response to salt stress	25	5	1.82	0.03178	up	BP
GO:0001774	microglial cell activation	25	5	1.82	0.03178	up	BP
GO:0042590	antigen processing and presentation of exogenous peptide antigen via MHC class I	25	5	1.82	0.03178	up	BP
GO:0009636	response to toxic substance	565	69	41.16	0.0322	up	BP
GO:1903169	regulation of calcium ion transmembrane transport	133	16	9.69	0.03224	up	BP
GO:0031397	negative regulation of protein ubiquitination	71	10	5.17	0.03226	up	BP
GO:0071222	cellular response to lipopolysaccharide	166	19	12.09	0.03307	up	BP
GO:0001954	positive regulation of cell-matrix adhesion	52	8	3.79	0.03322	up	BP
GO:1904591	positive regulation of protein import	52	8	3.79	0.03322	up	BP
GO:0045429	positive regulation of nitric oxide biosynthetic process	52	8	3.79	0.03322	up	BP
GO:1904407	positive regulation of nitric oxide metabolic process	52	8	3.79	0.03322	up	BP
GO:0022407	regulation of cell-cell adhesion	345	38	25.14	0.03333	up	BP
GO:0033157	regulation of intracellular protein transport	222	24	16.17	0.03341	up	BP
GO:0019724	B cell mediated immunity	102	13	7.43	0.03367	up	BP
GO:0070266	necroptotic process	34	6	2.48	0.03416	up	BP
GO:0032212	positive regulation of telomere maintenance via telomerase	34	6	2.48	0.03416	up	BP
GO:0034314	Arp2/3 complex-mediated actin nucleation	34	6	2.48	0.03416	up	BP
GO:1902622	regulation of neutrophil migration	34	6	2.48	0.03416	up	BP
GO:0038128	ERBB2 signaling pathway	34	6	2.48	0.03416	up	BP
GO:1902905	positive regulation of supramolecular fiber organization	200	22	14.57	0.03425	up	BP
GO:1990868	response to chemokine	43	7	3.13	0.03428	up	BP
GO:1990869	cellular response to chemokine	43	7	3.13	0.03428	up	BP
GO:0070671	response to interleukin-12	43	7	3.13	0.03428	up	BP
GO:0002711	positive regulation of T cell mediated immunity	43	7	3.13	0.03428	up	BP
GO:0006284	base-excision repair	43	7	3.13	0.03428	up	BP
GO:1903037	regulation of leukocyte cell-cell adhesion	257	27	18.72	0.0346	up	BP
GO:0006986	response to unfolded protein	167	19	12.17	0.03487	up	BP
GO:0006809	nitric oxide biosynthetic process	82	11	5.97	0.03501	up	BP
GO:0045785	positive regulation of cell adhesion	386	38	28.12	0.03508	up	BP
GO:0043242	negative regulation of protein-containing complex disassembly	72	10	5.25	0.03512	up	BP
GO:0051591	response to cAMP	124	15	9.03	0.03576	up	BP
GO:0002444	myeloid leukocyte mediated immunity	495	74	36.06	0.03612	up	BP
GO:0001666	response to hypoxia	375	37	27.32	0.03614	up	BP
GO:0002706	regulation of lymphocyte mediated immunity	131	20	9.54	0.03668	up	BP
GO:0031529	ruffle organization	53	8	3.86	0.03673	up	BP
GO:0010770	positive regulation of cell morphogenesis	168	19	12.24	0.03675	up	BP
GO:0002724	regulation of T cell cytokine production	26	5	1.89	0.03706	up	BP
GO:0090022	regulation of neutrophil chemotaxis	26	5	1.89	0.03706	up	BP
GO:0033081	regulation of T cell differentiation in thymus	26	5	1.89	0.03706	up	BP
GO:0051882	mitochondrial depolarization	26	5	1.89	0.03706	up	BP
GO:0010543	regulation of platelet activation	36	9	2.62	0.03714	up	BP
GO:0097067	cellular response to thyroid hormone stimulus	20	6	1.46	0.03739	up	BP
GO:0036293	response to decreased oxygen levels	388	38	28.27	0.03753	up	BP
GO:0015874	norepinephrine transport	18	4	1.31	0.03764	up	BP
GO:0002313	mature B cell differentiation involved in immune response	18	4	1.31	0.03764	up	BP
GO:0010269	response to selenium ion	18	4	1.31	0.03764	up	BP
GO:2000010	positive regulation of protein localization to cell surface	18	4	1.31	0.03764	up	BP
GO:0051085	chaperone cofactor-dependent protein refolding	18	4	1.31	0.03764	up	BP
GO:0031101	fin regeneration	18	4	1.31	0.03764	up	BP
GO:0071243	cellular response to arsenic-containing substance	18	4	1.31	0.03764	up	BP
GO:0070301	cellular response to hydrogen peroxide	83	11	6.05	0.03782	up	BP
GO:0150116	regulation of cell-substrate junction organization	63	9	4.59	0.03788	up	BP
GO:1903428	positive regulation of reactive oxygen species biosynthetic process	63	9	4.59	0.03788	up	BP
GO:0090109	regulation of cell-substrate junction assembly	63	9	4.59	0.03788	up	BP
GO:0051893	regulation of focal adhesion assembly	63	9	4.59	0.03788	up	BP
GO:0014072	response to isoquinoline alkaloid	44	7	3.21	0.03831	up	BP
GO:0006101	citrate metabolic process	44	7	3.21	0.03831	up	BP
GO:0043393	regulation of protein binding	248	26	18.07	0.03842	up	BP
GO:0032205	negative regulation of telomere maintenance	35	6	2.55	0.03878	up	BP
GO:0060236	regulation of mitotic spindle organization	35	6	2.55	0.03878	up	BP
GO:1904358	positive regulation of telomere maintenance via telomere lengthening	35	6	2.55	0.03878	up	BP
GO:0002367	cytokine production involved in immune response	94	12	6.85	0.03982	up	BP
GO:0014074	response to purine-containing compound	181	20	13.19	0.04041	up	BP
GO:0009069	serine family amino acid metabolic process	54	8	3.93	0.04048	up	BP
GO:0045576	mast cell activation	54	8	3.93	0.04048	up	BP
GO:0060099	regulation of phagocytosis, engulfment	15	6	1.09	0.04056	up	BP
GO:0044752	response to human chorionic gonadotropin	11	3	0.8	0.04089	up	BP
GO:1905098	negative regulation of guanyl-nucleotide exchange factor activity	11	3	0.8	0.04089	up	BP
GO:0070257	positive regulation of mucus secretion	11	3	0.8	0.04089	up	BP
GO:0046642	negative regulation of alpha-beta T cell proliferation	11	3	0.8	0.04089	up	BP
GO:0035999	tetrahydrofolate interconversion	11	3	0.8	0.04089	up	BP
GO:1905155	positive regulation of membrane invagination	11	3	0.8	0.04089	up	BP
GO:0009162	deoxyribonucleoside monophosphate metabolic process	11	3	0.8	0.04089	up	BP
GO:0010988	regulation of low-density lipoprotein particle clearance	11	3	0.8	0.04089	up	BP
GO:0033089	positive regulation of T cell differentiation in thymus	11	3	0.8	0.04089	up	BP
GO:0006188	IMP biosynthetic process	11	3	0.8	0.04089	up	BP
GO:0006268	DNA unwinding involved in DNA replication	11	3	0.8	0.04089	up	BP
GO:0060100	positive regulation of phagocytosis, engulfment	11	3	0.8	0.04089	up	BP
GO:0043604	amide biosynthetic process	516	53	37.59	0.04095	up	BP
GO:0051279	regulation of release of sequestered calcium ion into cytosol	64	9	4.66	0.04135	up	BP
GO:0002443	leukocyte mediated immunity	664	97	48.38	0.04209	up	BP
GO:0065008	regulation of biological quality	3334	286	242.9	0.04221	up	BP
GO:0033865	nucleoside bisphosphate metabolic process	116	14	8.45	0.04223	up	BP
GO:0033875	ribonucleoside bisphosphate metabolic process	116	14	8.45	0.04223	up	BP
GO:0034032	purine nucleoside bisphosphate metabolic process	116	14	8.45	0.04223	up	BP
GO:0032613	interleukin-10 production	45	7	3.28	0.04263	up	BP
GO:0045621	positive regulation of lymphocyte differentiation	95	12	6.92	0.04268	up	BP
GO:0071219	cellular response to molecule of bacterial origin	171	19	12.46	0.04283	up	BP
GO:0001914	regulation of T cell mediated cytotoxicity	27	5	1.97	0.04286	up	BP
GO:0043171	peptide catabolic process	27	5	1.97	0.04286	up	BP
GO:0071404	cellular response to low-density lipoprotein particle stimulus	27	5	1.97	0.04286	up	BP
GO:1902175	regulation of oxidative stress-induced intrinsic apoptotic signaling pathway	27	5	1.97	0.04286	up	BP
GO:0071276	cellular response to cadmium ion	27	5	1.97	0.04286	up	BP
GO:0070661	leukocyte proliferation	239	29	17.41	0.0431	up	BP
GO:0045619	regulation of lymphocyte differentiation	160	18	11.66	0.04311	up	BP
GO:0008037	cell recognition	95	17	6.92	0.04313	up	BP
GO:0031347	regulation of defense response	573	57	41.75	0.04352	up	BP
GO:0044818	mitotic G2/M transition checkpoint	36	6	2.62	0.04378	up	BP
GO:0045776	negative regulation of blood pressure	36	6	2.62	0.04378	up	BP
GO:0061900	glial cell activation	36	6	2.62	0.04378	up	BP
GO:2000403	positive regulation of lymphocyte migration	36	6	2.62	0.04378	up	BP
GO:0150076	neuroinflammatory response	36	6	2.62	0.04378	up	BP
GO:0050772	positive regulation of axonogenesis	85	11	6.19	0.04389	up	BP
GO:0009201	ribonucleoside triphosphate biosynthetic process	158	21	11.51	0.0442	up	BP
GO:0007015	actin filament organization	380	51	27.69	0.04428	up	BP
GO:0090151	establishment of protein localization to mitochondrial membrane	26	9	1.89	0.0443	up	BP
GO:0050870	positive regulation of T cell activation	183	20	13.33	0.04452	up	BP
GO:0050790	regulation of catalytic activity	2067	177	150.59	0.04464	up	BP
GO:0002407	dendritic cell chemotaxis	19	4	1.38	0.04502	up	BP
GO:0090083	regulation of inclusion body assembly	19	4	1.38	0.04502	up	BP
GO:0032957	inositol trisphosphate metabolic process	19	4	1.38	0.04502	up	BP
GO:0010984	regulation of lipoprotein particle clearance	19	4	1.38	0.04502	up	BP
GO:0032755	positive regulation of interleukin-6 production	65	9	4.74	0.04503	up	BP
GO:0071677	positive regulation of mononuclear cell migration	65	9	4.74	0.04503	up	BP
GO:0140053	mitochondrial gene expression	161	18	11.73	0.04538	up	BP
GO:0042542	response to hydrogen peroxide	150	17	10.93	0.0456	up	BP
GO:0046440	L-lysine metabolic process	5	2	0.36	0.04572	up	BP
GO:1904844	response to L-glutamine	5	2	0.36	0.04572	up	BP
GO:1904845	cellular response to L-glutamine	5	2	0.36	0.04572	up	BP
GO:1901843	positive regulation of high voltage-gated calcium channel activity	5	2	0.36	0.04572	up	BP
GO:0010360	negative regulation of anion channel activity	5	2	0.36	0.04572	up	BP
GO:0002351	serotonin production involved in inflammatory response	5	2	0.36	0.04572	up	BP
GO:0002420	natural killer cell mediated cytotoxicity directed against tumor cell target	5	2	0.36	0.04572	up	BP
GO:0002423	natural killer cell mediated immune response to tumor cell	5	2	0.36	0.04572	up	BP
GO:0002442	serotonin secretion involved in inflammatory response	5	2	0.36	0.04572	up	BP
GO:0002445	type II hypersensitivity	5	2	0.36	0.04572	up	BP
GO:0002155	regulation of thyroid hormone receptor signaling pathway	5	2	0.36	0.04572	up	BP
GO:0002159	desmosome assembly	5	2	0.36	0.04572	up	BP
GO:1902031	regulation of NADP metabolic process	5	2	0.36	0.04572	up	BP
GO:0002892	regulation of type II hypersensitivity	5	2	0.36	0.04572	up	BP
GO:0002894	positive regulation of type II hypersensitivity	5	2	0.36	0.04572	up	BP
GO:0002860	positive regulation of natural killer cell mediated cytotoxicity directed against tumor cell target	5	2	0.36	0.04572	up	BP
GO:0002855	regulation of natural killer cell mediated immune response to tumor cell	5	2	0.36	0.04572	up	BP
GO:0002857	positive regulation of natural killer cell mediated immune response to tumor cell	5	2	0.36	0.04572	up	BP
GO:0002858	regulation of natural killer cell mediated cytotoxicity directed against tumor cell target	5	2	0.36	0.04572	up	BP
GO:0045741	positive regulation of epidermal growth factor-activated receptor activity	5	2	0.36	0.04572	up	BP
GO:0019470	4-hydroxyproline catabolic process	5	2	0.36	0.04572	up	BP
GO:0019474	L-lysine catabolic process to acetyl-CoA	5	2	0.36	0.04572	up	BP
GO:0019477	L-lysine catabolic process	5	2	0.36	0.04572	up	BP
GO:0002501	peptide antigen assembly with MHC protein complex	5	2	0.36	0.04572	up	BP
GO:0009204	deoxyribonucleoside triphosphate catabolic process	5	2	0.36	0.04572	up	BP
GO:0036446	myofibroblast differentiation	5	2	0.36	0.04572	up	BP
GO:1903980	positive regulation of microglial cell activation	5	2	0.36	0.04572	up	BP
GO:0010989	negative regulation of low-density lipoprotein particle clearance	5	2	0.36	0.04572	up	BP
GO:2000402	negative regulation of lymphocyte migration	5	2	0.36	0.04572	up	BP
GO:0050957	equilibrioception	5	2	0.36	0.04572	up	BP
GO:0071211	protein targeting to vacuole involved in autophagy	5	2	0.36	0.04572	up	BP
GO:0033026	negative regulation of mast cell apoptotic process	5	2	0.36	0.04572	up	BP
GO:1904058	positive regulation of sensory perception of pain	5	2	0.36	0.04572	up	BP
GO:0045919	positive regulation of cytolysis	5	2	0.36	0.04572	up	BP
GO:0001794	type IIa hypersensitivity	5	2	0.36	0.04572	up	BP
GO:0001796	regulation of type IIa hypersensitivity	5	2	0.36	0.04572	up	BP
GO:0001798	positive regulation of type IIa hypersensitivity	5	2	0.36	0.04572	up	BP
GO:0042822	pyridoxal phosphate metabolic process	5	2	0.36	0.04572	up	BP
GO:0016259	selenocysteine metabolic process	5	2	0.36	0.04572	up	BP
GO:2000676	positive regulation of type B pancreatic cell apoptotic process	5	2	0.36	0.04572	up	BP
GO:1904304	regulation of gastro-intestinal system smooth muscle contraction	5	2	0.36	0.04572	up	BP
GO:0150078	positive regulation of neuroinflammatory response	5	2	0.36	0.04572	up	BP
GO:0006562	proline catabolic process	5	2	0.36	0.04572	up	BP
GO:0060574	intestinal epithelial cell maturation	5	2	0.36	0.04572	up	BP
GO:1904170	regulation of bleb assembly	5	2	0.36	0.04572	up	BP
GO:0002396	MHC protein complex assembly	5	2	0.36	0.04572	up	BP
GO:0032763	regulation of mast cell cytokine production	5	2	0.36	0.04572	up	BP
GO:0002886	regulation of myeloid leukocyte mediated immunity	50	11	3.64	0.04635	up	BP
GO:0030155	regulation of cell adhesion	625	64	45.53	0.04635	up	BP
GO:0002446	neutrophil mediated immunity	460	70	33.51	0.04677	up	BP
GO:1900407	regulation of cellular response to oxidative stress	86	11	6.27	0.04717	up	BP
GO:0062014	negative regulation of small molecule metabolic process	86	11	6.27	0.04717	up	BP
GO:0015800	acidic amino acid transport	46	7	3.35	0.04725	up	BP
GO:0042307	positive regulation of protein import into nucleus	46	7	3.35	0.04725	up	BP
GO:0051293	establishment of spindle localization	46	7	3.35	0.04725	up	BP
GO:0032273	positive regulation of protein polymerization	118	14	8.6	0.04768	up	BP
GO:0001736	establishment of planar polarity	76	10	5.54	0.0483	up	BP
GO:0006091	generation of precursor metabolites and energy	483	81	35.19	0.04848	up	BP
GO:0051249	regulation of lymphocyte activation	371	40	27.03	0.04868	up	BP
GO:0009409	response to cold	56	8	4.08	0.04872	up	BP
GO:0048008	platelet-derived growth factor receptor signaling pathway	66	9	4.81	0.04892	up	BP
GO:0007157	heterophilic cell-cell adhesion via plasma membrane cell adhesion molecules	37	6	2.7	0.04916	up	BP
GO:0002752	cell surface pattern recognition receptor signaling pathway	37	6	2.7	0.04916	up	BP
GO:0032653	regulation of interleukin-10 production	37	6	2.7	0.04916	up	BP
GO:0071312	cellular response to alkaloid	37	6	2.7	0.04916	up	BP
GO:0097178	ruffle assembly	37	6	2.7	0.04916	up	BP
GO:0007095	mitotic G2 DNA damage checkpoint signaling	28	5	2.04	0.04916	up	BP
GO:0032435	negative regulation of proteasomal ubiquitin-dependent protein catabolic process	28	5	2.04	0.04916	up	BP
GO:0002707	negative regulation of lymphocyte mediated immunity	28	5	2.04	0.04916	up	BP
GO:0043616	keratinocyte proliferation	28	5	2.04	0.04916	up	BP
GO:1902745	positive regulation of lamellipodium organization	28	5	2.04	0.04916	up	BP
GO:0140895	cell surface toll-like receptor signaling pathway	37	6	2.7	0.04916	up	BP
GO:0046683	response to organophosphorus	165	20	12.02	0.04933	up	BP
GO:0051130	positive regulation of cellular component organization	1194	107	86.99	0.04954	up	BP
GO:0044409	symbiont entry into host	174	19	12.68	0.04961	up	BP
GO:0014909	smooth muscle cell migration	108	13	7.87	0.04995	up	BP
GO:0061631	ubiquitin conjugating enzyme activity	35	15	2.67	1.2e-08	down	MF
GO:0004842	ubiquitin-protein transferase activity	408	72	31.13	8.3e-07	down	MF
GO:0051033	RNA transmembrane transporter activity	7	6	0.53	1.3e-06	down	MF
GO:0042301	phosphate ion binding	20	9	1.53	6.5e-06	down	MF
GO:0004731	purine-nucleoside phosphorylase activity	9	6	0.69	1.3e-05	down	MF
GO:0035650	AP-1 adaptor complex binding	9	6	0.69	1.3e-05	down	MF
GO:0061630	ubiquitin protein ligase activity	267	40	20.38	2.7e-05	down	MF
GO:0002060	purine nucleobase binding	11	6	0.84	6.4e-05	down	MF
GO:0035612	AP-2 adaptor complex binding	18	7	1.37	0.00022	down	MF
GO:0047444	N-acylneuraminate-9-phosphate synthase activity	6	4	0.46	0.00045	down	MF
GO:0050462	N-acetylneuraminate synthase activity	6	4	0.46	0.00045	down	MF
GO:0080025	phosphatidylinositol-3,5-bisphosphate binding	23	7	1.76	0.00122	down	MF
GO:0017064	fatty acid amide hydrolase activity	4	3	0.31	0.00167	down	MF
GO:0008781	N-acylneuraminate cytidylyltransferase activity	8	4	0.61	0.00184	down	MF
GO:0005484	SNAP receptor activity	40	9	3.05	0.00266	down	MF
GO:0047372	monoacylglycerol lipase activity	20	6	1.53	0.00297	down	MF
GO:0008270	zinc ion binding	701	73	53.49	0.00357	down	MF
GO:0098821	BMP receptor activity	5	3	0.38	0.00394	down	MF
GO:0004535	poly(A)-specific ribonuclease activity	15	5	1.14	0.00402	down	MF
GO:0043539	protein serine/threonine kinase activator activity	35	8	2.67	0.0041	down	MF
GO:0032266	phosphatidylinositol-3-phosphate binding	36	8	2.75	0.00493	down	MF
GO:0004040	amidase activity	6	3	0.46	0.00743	down	MF
GO:0003677	DNA binding	1636	149	124.85	0.00943	down	MF
GO:0003700	DNA-binding transcription factor activity	968	95	73.87	0.0095	down	MF
GO:0052650	all-trans-retinol dehydrogenase (NADP+) activity	7	3	0.53	0.01227	down	MF
GO:0010340	carboxyl-O-methyltransferase activity	7	3	0.53	0.01227	down	MF
GO:0050656	3'-phosphoadenosine 5'-phosphosulfate binding	7	3	0.53	0.01227	down	MF
GO:0051998	protein carboxyl O-methyltransferase activity	7	3	0.53	0.01227	down	MF
GO:0005381	iron ion transmembrane transporter activity	13	4	0.99	0.01378	down	MF
GO:0043130	ubiquitin binding	70	11	5.34	0.01632	down	MF
GO:0032182	ubiquitin-like protein binding	89	13	6.79	0.01706	down	MF
GO:0004745	all-trans-retinol dehydrogenase (NAD+) activity	8	3	0.61	0.01854	down	MF
GO:0001540	amyloid-beta binding	45	8	3.43	0.01915	down	MF
GO:0019003	GDP binding	72	11	5.49	0.01987	down	MF
GO:0008276	protein methyltransferase activity	93	13	7.1	0.02384	down	MF
GO:0070492	oligosaccharide binding	9	3	0.69	0.02625	down	MF
GO:0004571	mannosyl-oligosaccharide 1,2-alpha-mannosidase activity	9	3	0.69	0.02625	down	MF
GO:0004653	polypeptide N-acetylgalactosaminyltransferase activity	9	3	0.69	0.02625	down	MF
GO:0003707	nuclear steroid receptor activity	57	9	4.35	0.02758	down	MF
GO:0008607	phosphorylase kinase regulator activity	4	2	0.31	0.03146	down	MF
GO:0017095	heparan sulfate 6-O-sulfotransferase activity	4	2	0.31	0.03146	down	MF
GO:1905394	retromer complex binding	4	2	0.31	0.03146	down	MF
GO:0070644	vitamin D response element binding	4	2	0.31	0.03146	down	MF
GO:0050265	RNA uridylyltransferase activity	4	2	0.31	0.03146	down	MF
GO:0015184	L-cystine transmembrane transporter activity	4	2	0.31	0.03146	down	MF
GO:1990837	sequence-specific double-stranded DNA binding	620	60	47.31	0.03187	down	MF
GO:0042500	aspartic endopeptidase activity, intramembrane cleaving	10	3	0.76	0.03541	down	MF
GO:0000981	DNA-binding transcription factor activity, RNA polymerase II-specific	854	81	65.17	0.03592	down	MF
GO:0043560	insulin receptor substrate binding	17	4	1.3	0.03598	down	MF
GO:0004843	cysteine-type deubiquitinase activity	70	10	5.34	0.03882	down	MF
GO:0001221	transcription coregulator binding	43	7	3.28	0.04247	down	MF
GO:0141052	histone H3 demethylase activity	26	5	1.98	0.04394	down	MF
GO:0015924	mannosyl-oligosaccharide mannosidase activity	11	3	0.84	0.046	down	MF
GO:1990459	transferrin receptor binding	11	3	0.84	0.046	down	MF
GO:0003964	RNA-directed DNA polymerase activity	5	2	0.38	0.04981	down	MF
GO:0047066	phospholipid-hydroperoxide glutathione peroxidase activity	5	2	0.38	0.04981	down	MF
GO:0035368	selenocysteine insertion sequence binding	5	2	0.38	0.04981	down	MF
GO:0070137	ubiquitin-like protein-specific endopeptidase activity	5	2	0.38	0.04981	down	MF
GO:0070139	SUMO-specific endopeptidase activity	5	2	0.38	0.04981	down	MF
GO:0043423	3-phosphoinositide-dependent protein kinase binding	5	2	0.38	0.04981	down	MF
GO:0035033	histone deacetylase regulator activity	5	2	0.38	0.04981	down	MF
GO:0003720	telomerase activity	5	2	0.38	0.04981	down	MF
GO:0009055	electron transfer activity	127	30	9.56	4.5e-06	up	MF
GO:0031072	heat shock protein binding	138	26	10.39	1.1e-05	up	MF
GO:0015288	porin activity	9	6	0.68	1.2e-05	up	MF
GO:0051015	actin filament binding	141	26	10.62	1.6e-05	up	MF
GO:0051082	unfolded protein binding	101	20	7.6	5.3e-05	up	MF
GO:0016405	CoA-ligase activity	26	9	1.96	7.2e-05	up	MF
GO:0005200	structural constituent of cytoskeleton	81	17	6.1	8.9e-05	up	MF
GO:0016175	superoxide-generating NAD(P)H oxidase activity	5	4	0.38	0.00015	up	MF
GO:0055131	C3HC4-type RING finger domain binding	5	4	0.38	0.00015	up	MF
GO:0005524	ATP binding	1373	138	103.38	0.00016	up	MF
GO:0070182	DNA polymerase binding	19	7	1.43	0.0003	up	MF
GO:0016878	acid-thiol ligase activity	31	9	2.33	0.00033	up	MF
GO:0008137	NADH dehydrogenase (ubiquinone) activity	40	10	3.01	0.00059	up	MF
GO:0050136	NADH:ubiquinone reductase (non-electrogenic) activity	40	10	3.01	0.00059	up	MF
GO:0016646	oxidoreductase activity, acting on the CH-NH group of donors, NAD or NADP as acceptor	16	6	1.2	0.00074	up	MF
GO:0032405	MutLalpha complex binding	7	4	0.53	0.00093	up	MF
GO:0043531	ADP binding	51	11	3.84	0.00121	up	MF
GO:0072341	modified amino acid binding	68	13	5.12	0.00147	up	MF
GO:0001851	complement component C3b binding	4	3	0.3	0.00161	up	MF
GO:0030337	DNA polymerase processivity factor activity	4	3	0.3	0.00161	up	MF
GO:0032139	dinucleotide insertion or deletion binding	4	3	0.3	0.00161	up	MF
GO:0000701	purine-specific mismatch base pair DNA N-glycosylase activity	4	3	0.3	0.00161	up	MF
GO:0008430	selenium binding	13	5	0.98	0.00185	up	MF
GO:0140375	immune receptor activity	73	15	5.5	0.00217	up	MF
GO:0051087	protein-folding chaperone binding	134	20	10.09	0.0024	up	MF
GO:0004029	aldehyde dehydrogenase (NAD+) activity	14	5	1.05	0.00269	up	MF
GO:0033691	sialic acid binding	5	3	0.38	0.00379	up	MF
GO:0042803	protein homodimerization activity	793	80	59.71	0.0038	up	MF
GO:0050660	flavin adenine dinucleotide binding	68	12	5.12	0.00442	up	MF
GO:0016176	superoxide-generating NADPH oxidase activator activity	10	4	0.75	0.00464	up	MF
GO:0020037	heme binding	86	14	6.48	0.0047	up	MF
GO:0019829	ATPase-coupled monoatomic cation transmembrane transporter activity	52	10	3.92	0.00482	up	MF
GO:0042277	peptide binding	243	30	18.3	0.0049	up	MF
GO:0042625	ATPase-coupled ion transmembrane transporter activity	53	10	3.99	0.00555	up	MF
GO:0001618	virus receptor activity	70	12	5.27	0.00562	up	MF
GO:0070325	lipoprotein particle receptor binding	30	7	2.26	0.00588	up	MF
GO:0015035	protein-disulfide reductase activity	38	8	2.86	0.00642	up	MF
GO:0046933	proton-transporting ATP synthase activity, rotational mechanism	11	4	0.83	0.00686	up	MF
GO:0016742	hydroxymethyl-, formyl- and related transferase activity	11	4	0.83	0.00686	up	MF
GO:0010181	FMN binding	11	4	0.83	0.00686	up	MF
GO:0106017	phosphatidylinositol-3,4-bisphosphate phosphatase activity	6	3	0.45	0.00716	up	MF
GO:0016887	ATP hydrolysis activity	368	41	27.71	0.00718	up	MF
GO:0044183	protein folding chaperone	24	6	1.81	0.00743	up	MF
GO:0051219	phosphoprotein binding	100	15	7.53	0.00762	up	MF
GO:0030554	adenyl nucleotide binding	1533	158	115.43	0.00837	up	MF
GO:0004812	aminoacyl-tRNA ligase activity	40	8	3.01	0.00884	up	MF
GO:0002161	aminoacyl-tRNA editing activity	12	4	0.9	0.00968	up	MF
GO:0004022	alcohol dehydrogenase (NAD+) activity	12	4	0.9	0.00968	up	MF
GO:0050661	NADP binding	41	8	3.09	0.01028	up	MF
GO:0004715	non-membrane spanning protein tyrosine kinase activity	58	10	4.37	0.01058	up	MF
GO:0050750	low-density lipoprotein particle receptor binding	26	6	1.96	0.01117	up	MF
GO:0044769	ATPase activity, coupled to transmembrane movement of ions, rotational mechanism	26	6	1.96	0.01117	up	MF
GO:0016493	C-C chemokine receptor activity	7	3	0.53	0.01183	up	MF
GO:0016615	malate dehydrogenase activity	7	3	0.53	0.01183	up	MF
GO:0097718	disordered domain specific binding	42	8	3.16	0.01188	up	MF
GO:0003779	actin binding	362	52	27.26	0.0121	up	MF
GO:0033218	amide binding	314	35	23.64	0.01229	up	MF
GO:0016502	nucleotide receptor activity	13	4	0.98	0.01316	up	MF
GO:0001614	purinergic nucleotide receptor activity	13	4	0.98	0.01316	up	MF
GO:0043394	proteoglycan binding	36	7	2.71	0.01627	up	MF
GO:0050839	cell adhesion molecule binding	212	25	15.96	0.01662	up	MF
GO:0004888	transmembrane signaling receptor activity	471	50	35.46	0.01695	up	MF
GO:0005031	tumor necrosis factor receptor activity	14	4	1.05	0.01735	up	MF
GO:0005035	death receptor activity	14	4	1.05	0.01735	up	MF
GO:0140318	protein transporter activity	14	4	1.05	0.01735	up	MF
GO:0008320	protein transmembrane transporter activity	14	4	1.05	0.01735	up	MF
GO:0005545	1-phosphatidylinositol binding	21	5	1.58	0.01764	up	MF
GO:0022884	macromolecule transmembrane transporter activity	21	5	1.58	0.01764	up	MF
GO:0070324	thyroid hormone binding	8	3	0.6	0.01787	up	MF
GO:0008556	P-type potassium transmembrane transporter activity	8	3	0.6	0.01787	up	MF
GO:0005391	P-type sodium:potassium-exchanging transporter activity	8	3	0.6	0.01787	up	MF
GO:0050291	sphingosine N-acyltransferase activity	8	3	0.6	0.01787	up	MF
GO:0005504	fatty acid binding	37	7	2.79	0.01881	up	MF
GO:0016831	carboxy-lyase activity	29	6	2.18	0.01902	up	MF
GO:0008289	lipid binding	626	63	47.13	0.0192	up	MF
GO:0016491	oxidoreductase activity	621	85	46.76	0.02005	up	MF
GO:0016651	oxidoreductase activity, acting on NAD(P)H	92	22	6.93	0.0212	up	MF
GO:0048156	tau protein binding	22	5	1.66	0.02145	up	MF
GO:0003684	damaged DNA binding	66	10	4.97	0.02496	up	MF
GO:0016209	antioxidant activity	66	10	4.97	0.02496	up	MF
GO:0008554	P-type sodium transporter activity	9	3	0.68	0.02533	up	MF
GO:0050542	icosanoid binding	9	3	0.68	0.02533	up	MF
GO:0004017	adenylate kinase activity	9	3	0.68	0.02533	up	MF
GO:0000166	nucleotide binding	1972	205	148.48	0.02705	up	MF
GO:0004252	serine-type endopeptidase activity	106	14	7.98	0.02743	up	MF
GO:0016881	acid-amino acid ligase activity	18	6	1.36	0.02777	up	MF
GO:0000146	microfilament motor activity	16	4	1.2	0.02798	up	MF
GO:0043395	heparan sulfate proteoglycan binding	16	4	1.2	0.02798	up	MF
GO:1901265	nucleoside phosphate binding	1975	205	148.71	0.03003	up	MF
GO:0032135	DNA insertion or deletion binding	8	5	0.6	0.03048	up	MF
GO:0003960	NADPH:quinone reductase activity	4	2	0.3	0.03067	up	MF
GO:0032395	MHC class II receptor activity	4	2	0.3	0.03067	up	MF
GO:0070326	very-low-density lipoprotein particle receptor binding	4	2	0.3	0.03067	up	MF
GO:0042835	BRE binding	4	2	0.3	0.03067	up	MF
GO:0052810	1-phosphatidylinositol-5-kinase activity	4	2	0.3	0.03067	up	MF
GO:0004992	platelet activating factor receptor activity	4	2	0.3	0.03067	up	MF
GO:0016649	oxidoreductase activity, acting on the CH-NH group of donors, quinone or similar compound as acceptor	4	2	0.3	0.03067	up	MF
GO:0004800	thyroxine 5'-deiodinase activity	4	2	0.3	0.03067	up	MF
GO:0016212	kynurenine-oxoglutarate transaminase activity	4	2	0.3	0.03067	up	MF
GO:0030060	L-malate dehydrogenase (NAD+) activity	4	2	0.3	0.03067	up	MF
GO:0004032	aldose reductase (NADPH) activity	4	2	0.3	0.03067	up	MF
GO:0005314	high-affinity L-glutamate transmembrane transporter activity	4	2	0.3	0.03067	up	MF
GO:0015501	glutamate:sodium symporter activity	4	2	0.3	0.03067	up	MF
GO:0008970	phospholipase A1 activity	4	2	0.3	0.03067	up	MF
GO:0016972	thiol oxidase activity	4	2	0.3	0.03067	up	MF
GO:0051575	5'-deoxyribose-5-phosphate lyase activity	4	2	0.3	0.03067	up	MF
GO:0005178	integrin binding	129	16	9.71	0.03262	up	MF
GO:0016645	oxidoreductase activity, acting on the CH-NH group of donors	26	9	1.96	0.03368	up	MF
GO:0003691	double-stranded telomeric DNA binding	10	3	0.75	0.0342	up	MF
GO:0032554	purine deoxyribonucleotide binding	10	3	0.75	0.0342	up	MF
GO:0050815	phosphoserine residue binding	10	3	0.75	0.0342	up	MF
GO:0009931	calcium-dependent protein serine/threonine kinase activity	10	3	0.75	0.0342	up	MF
GO:0045028	G protein-coupled purinergic nucleotide receptor activity	10	3	0.75	0.0342	up	MF
GO:0030547	signaling receptor inhibitor activity	10	3	0.75	0.0342	up	MF
GO:0001608	G protein-coupled nucleotide receptor activity	10	3	0.75	0.0342	up	MF
GO:0043295	glutathione binding	10	3	0.75	0.0342	up	MF
GO:0030506	ankyrin binding	17	4	1.28	0.03447	up	MF
GO:0016829	lyase activity	162	19	12.2	0.03539	up	MF
GO:0019840	isoprenoid binding	25	5	1.88	0.03594	up	MF
GO:1904680	peptide transmembrane transporter activity	25	5	1.88	0.03594	up	MF
GO:0015020	glucuronosyltransferase activity	25	5	1.88	0.03594	up	MF
GO:0017171	serine hydrolase activity	131	16	9.86	0.03689	up	MF
GO:0008308	voltage-gated monoatomic anion channel activity	18	4	1.36	0.04176	up	MF
GO:0043325	phosphatidylinositol-3,4-bisphosphate binding	26	5	1.96	0.04183	up	MF
GO:0019842	vitamin binding	123	15	9.26	0.04285	up	MF
GO:0016918	retinal binding	11	3	0.83	0.04446	up	MF
GO:0005542	folic acid binding	11	3	0.83	0.04446	up	MF
GO:0019841	retinol binding	11	3	0.83	0.04446	up	MF
GO:1900750	oligopeptide binding	11	3	0.83	0.04446	up	MF
GO:0038187	pattern recognition receptor activity	11	3	0.83	0.04446	up	MF
GO:0016667	oxidoreductase activity, acting on a sulfur group of donors	67	15	5.04	0.04679	up	MF
GO:0004896	cytokine receptor activity	54	8	4.07	0.04762	up	MF
GO:0044877	protein-containing complex binding	1119	115	84.25	0.04794	up	MF
GO:0003810	protein-glutamine gamma-glutamyltransferase activity	5	2	0.38	0.04859	up	MF
GO:0002134	UTP binding	5	2	0.38	0.04859	up	MF
GO:0001875	lipopolysaccharide immune receptor activity	5	2	0.38	0.04859	up	MF
GO:0032551	pyrimidine ribonucleoside binding	5	2	0.38	0.04859	up	MF
GO:0000285	1-phosphatidylinositol-3-phosphate 5-kinase activity	5	2	0.38	0.04859	up	MF
GO:0032051	clathrin light chain binding	5	2	0.38	0.04859	up	MF
GO:0004470	malic enzyme activity	5	2	0.38	0.04859	up	MF
GO:0019238	cyclohydrolase activity	5	2	0.38	0.04859	up	MF
GO:0016748	succinyltransferase activity	5	2	0.38	0.04859	up	MF
GO:0005518	collagen binding	64	9	4.82	0.04922	up	MF
GO:0001540	amyloid-beta binding	45	7	3.39	0.04945	up	MF
GO:0016830	carbon-carbon lyase activity	45	7	3.39	0.04945	up	MF
GO:0042802	identical protein binding	1732	162	130.41	0.04986	up	MF
GO:0034045	phagophore assembly site membrane	18	12	1.41	6.1e-10	down	CC
GO:0000421	autophagosome membrane	27	12	2.12	2.9e-07	down	CC
GO:0000407	phagophore assembly site	36	21	2.83	2.5e-06	down	CC
GO:1990718	axonemal central pair projection	4	4	0.31	3.8e-05	down	CC
GO:1990316	Atg1/ULK1 kinase complex	8	5	0.63	0.00014	down	CC
GO:0031462	Cul2-RING ubiquitin ligase complex	11	5	0.86	0.00091	down	CC
GO:0000151	ubiquitin ligase complex	296	53	23.24	0.00133	down	CC
GO:0080008	Cul4-RING E3 ubiquitin ligase complex	36	9	2.83	0.00148	down	CC
GO:0034361	very-low-density lipoprotein particle	14	5	1.1	0.00324	down	CC
GO:0036513	Derlin-1 retrotranslocation complex	14	5	1.1	0.00324	down	CC
GO:0042627	chylomicron	9	4	0.71	0.00345	down	CC
GO:0097629	extrinsic component of omegasome membrane	5	3	0.39	0.00428	down	CC
GO:0016607	nuclear speck	385	45	30.23	0.00452	down	CC
GO:0031902	late endosome membrane	127	19	9.97	0.00472	down	CC
GO:0045335	phagocytic vesicle	123	18	9.66	0.00738	down	CC
GO:0005776	autophagosome	142	29	11.15	0.00743	down	CC
GO:0000138	Golgi trans cisterna	11	4	0.86	0.00796	down	CC
GO:1990712	HFE-transferrin receptor complex	11	4	0.86	0.00796	down	CC
GO:0035032	phosphatidylinositol 3-kinase complex, class III	6	3	0.47	0.00805	down	CC
GO:0031461	cullin-RING ubiquitin ligase complex	160	30	12.56	0.00883	down	CC
GO:0031201	SNARE complex	47	9	3.69	0.00986	down	CC
GO:0019005	SCF ubiquitin ligase complex	49	9	3.85	0.01292	down	CC
GO:0005765	lysosomal membrane	271	32	21.28	0.0131	down	CC
GO:0098852	lytic vacuole membrane	271	32	21.28	0.0131	down	CC
GO:0044322	endoplasmic reticulum quality control compartment	26	6	2.04	0.01359	down	CC
GO:0005774	vacuolar membrane	316	45	24.81	0.01638	down	CC
GO:0044232	organelle membrane contact site	20	5	1.57	0.01694	down	CC
GO:0031984	organelle subcompartment	1509	144	118.47	0.02759	down	CC
GO:0032585	multivesicular body membrane	9	3	0.71	0.0283	down	CC
GO:0030014	CCR4-NOT complex	16	4	1.26	0.03206	down	CC
GO:0005654	nucleoplasm	3300	294	259.08	0.03272	down	CC
GO:1904813	ficolin-1-rich granule lumen	134	17	10.52	0.0331	down	CC
GO:0030670	phagocytic vesicle membrane	67	10	5.26	0.03528	down	CC
GO:0000139	Golgi membrane	676	66	53.07	0.03676	down	CC
GO:0044754	autolysosome	10	3	0.79	0.03812	down	CC
GO:0035145	exon-exon junction complex	17	4	1.33	0.0394	down	CC
GO:0101002	ficolin-1-rich granule	190	22	14.92	0.0424	down	CC
GO:0016605	PML body	110	14	8.64	0.04877	down	CC
GO:0043209	myelin sheath	215	54	15.5	1.7e-16	up	CC
GO:0005759	mitochondrial matrix	490	71	35.33	1.8e-07	up	CC
GO:0098800	inner mitochondrial membrane protein complex	123	26	8.87	5.2e-07	up	CC
GO:0043020	NADPH oxidase complex	7	6	0.5	9.1e-07	up	CC
GO:0070821	tertiary granule membrane	52	15	3.75	2.3e-06	up	CC
GO:0005758	mitochondrial intermembrane space	83	19	5.98	5.1e-06	up	CC
GO:0033269	internode region of axon	12	7	0.87	5.7e-06	up	CC
GO:0035579	specific granule membrane	78	18	5.62	8e-06	up	CC
GO:0097433	dense body	9	6	0.65	9.6e-06	up	CC
GO:0070557	PCNA-p21 complex	4	4	0.29	2.7e-05	up	CC
GO:0002102	podosome	46	12	3.32	7.2e-05	up	CC
GO:0099524	postsynaptic cytosol	5	4	0.36	0.00013	up	CC
GO:0045261	proton-transporting ATP synthase complex, catalytic core F(1)	5	4	0.36	0.00013	up	CC
GO:1904813	ficolin-1-rich granule lumen	134	22	9.66	0.00022	up	CC
GO:0005884	actin filament	91	17	6.56	0.00024	up	CC
GO:0002199	zona pellucida receptor complex	10	5	0.72	0.00036	up	CC
GO:0005742	mitochondrial outer membrane translocase complex	10	5	0.72	0.00036	up	CC
GO:0005775	vacuolar lumen	157	24	11.32	0.00036	up	CC
GO:0042470	melanosome	112	19	8.07	0.00038	up	CC
GO:0005743	mitochondrial inner membrane	471	68	33.96	0.00045	up	CC
GO:0101003	ficolin-1-rich granule membrane	56	12	4.04	0.00053	up	CC
GO:0101031	protein folding chaperone complex	20	9	1.44	0.00061	up	CC
GO:0005925	focal adhesion	173	25	12.47	0.00064	up	CC
GO:0032587	ruffle membrane	100	17	7.21	0.00074	up	CC
GO:0009897	external side of plasma membrane	188	26	13.55	0.00099	up	CC
GO:0045275	respiratory chain complex III	12	5	0.87	0.00099	up	CC
GO:0030894	replisome	30	8	2.16	0.00099	up	CC
GO:0061827	sperm head	12	5	0.87	0.00099	up	CC
GO:0045271	respiratory chain complex I	45	10	3.24	0.00113	up	CC
GO:0005640	nuclear outer membrane	24	7	1.73	0.00115	up	CC
GO:0099568	cytoplasmic region	461	51	33.24	0.00139	up	CC
GO:0045121	membrane raft	346	40	24.95	0.002	up	CC
GO:0015629	actin cytoskeleton	421	60	30.35	0.0021	up	CC
GO:0030863	cortical cytoskeleton	92	15	6.63	0.00229	up	CC
GO:0005832	chaperonin-containing T-complex	9	4	0.65	0.00252	up	CC
GO:0046930	pore complex	21	6	1.51	0.00293	up	CC
GO:0036019	endolysosome	21	6	1.51	0.00293	up	CC
GO:0031234	extrinsic component of cytoplasmic side of plasma membrane	124	18	8.94	0.00334	up	CC
GO:0033186	CAF-1 complex	5	3	0.36	0.00334	up	CC
GO:0032010	phagolysosome	5	3	0.36	0.00334	up	CC
GO:0043596	nuclear replication fork	44	9	3.17	0.00362	up	CC
GO:0030131	clathrin adaptor complex	29	7	2.09	0.00379	up	CC
GO:0042555	MCM complex	10	4	0.72	0.00396	up	CC
GO:0034774	secretory granule lumen	295	34	21.27	0.0044	up	CC
GO:0044297	cell body	606	61	43.69	0.00472	up	CC
GO:0005912	adherens junction	299	34	21.56	0.00542	up	CC
GO:0042641	actomyosin	82	13	5.91	0.00557	up	CC
GO:0005885	Arp2/3 protein complex	11	4	0.79	0.00587	up	CC
GO:0005886	plasma membrane	3455	305	249.09	0.00767	up	CC
GO:0032432	actin filament bundle	76	12	5.48	0.00783	up	CC
GO:0030027	lamellipodium	230	27	16.58	0.00822	up	CC
GO:0042645	mitochondrial nucleoid	50	9	3.6	0.00868	up	CC
GO:0070938	contractile ring	19	5	1.37	0.00956	up	CC
GO:0030666	endocytic vesicle membrane	128	17	9.23	0.01038	up	CC
GO:0005874	microtubule	381	40	27.47	0.01039	up	CC
GO:0005826	actomyosin contractile ring	7	3	0.5	0.01049	up	CC
GO:0097227	sperm annulus	7	3	0.5	0.01049	up	CC
GO:0001725	stress fiber	70	11	5.05	0.01104	up	CC
GO:0097517	contractile actin filament bundle	70	11	5.05	0.01104	up	CC
GO:0035578	azurophil granule lumen	89	13	6.42	0.01106	up	CC
GO:0030130	clathrin coat of trans-Golgi network vesicle	13	4	0.94	0.01134	up	CC
GO:0005576	extracellular region	1475	128	106.34	0.013	up	CC
GO:0043025	neuronal cell body	530	52	38.21	0.01388	up	CC
GO:0030669	clathrin-coated endocytic vesicle membrane	29	6	2.09	0.01565	up	CC
GO:0008290	F-actin capping protein complex	8	3	0.58	0.01589	up	CC
GO:0005663	DNA replication factor C complex	8	3	0.58	0.01589	up	CC
GO:0031105	septin complex	8	3	0.58	0.01589	up	CC
GO:0036020	endolysosome membrane	15	4	1.08	0.01928	up	CC
GO:0001931	uropod	15	4	1.08	0.01928	up	CC
GO:0031254	cell trailing edge	15	4	1.08	0.01928	up	CC
GO:0030125	clathrin vesicle coat	23	5	1.66	0.02178	up	CC
GO:0071439	clathrin complex	9	3	0.65	0.02258	up	CC
GO:0030864	cortical actin cytoskeleton	68	10	4.9	0.02314	up	CC
GO:0030139	endocytic vesicle	245	29	17.66	0.0234	up	CC
GO:0030665	clathrin-coated vesicle membrane	88	12	6.34	0.02364	up	CC
GO:0012510	trans-Golgi network transport vesicle membrane	16	4	1.15	0.02428	up	CC
GO:0001772	immunological synapse	41	7	2.96	0.02577	up	CC
GO:0019866	organelle inner membrane	514	75	37.06	0.02689	up	CC
GO:0005688	U6 snRNP	4	2	0.29	0.02825	up	CC
GO:0061830	concave side of sperm head	4	2	0.29	0.02825	up	CC
GO:0005944	phosphatidylinositol 3-kinase complex, class IB	4	2	0.29	0.02825	up	CC
GO:0098592	cytoplasmic side of apical plasma membrane	4	2	0.29	0.02825	up	CC
GO:0017102	methionyl glutamyl tRNA synthetase complex	4	2	0.29	0.02825	up	CC
GO:0043259	laminin-10 complex	4	2	0.29	0.02825	up	CC
GO:0032156	septin cytoskeleton	10	3	0.72	0.03055	up	CC
GO:0099513	polymeric cytoskeletal fiber	519	58	37.42	0.03169	up	CC
GO:0005938	cell cortex	283	36	20.4	0.03171	up	CC
GO:1990391	DNA repair complex	34	6	2.45	0.03267	up	CC
GO:0043202	lysosomal lumen	82	11	5.91	0.0328	up	CC
GO:0043601	nuclear replisome	26	5	1.87	0.03565	up	CC
GO:0005652	nuclear lamina	18	4	1.3	0.03641	up	CC
GO:0005637	nuclear inner membrane	44	7	3.17	0.0365	up	CC
GO:0001726	ruffle	195	29	14.06	0.03712	up	CC
GO:0001891	phagocytic cup	27	5	1.95	0.04125	up	CC
GO:0005740	mitochondrial envelope	739	102	53.28	0.04346	up	CC
GO:0030132	clathrin coat of coated pit	19	4	1.37	0.04357	up	CC
GO:0150034	distal axon	289	29	20.84	0.04375	up	CC
GO:0005757	mitochondrial permeability transition pore complex	5	2	0.36	0.04485	up	CC
GO:0061825	podosome core	5	2	0.36	0.04485	up	CC
GO:0005658	alpha DNA polymerase:primase complex	5	2	0.36	0.04485	up	CC
GO:0042719	mitochondrial intermembrane space protein transporter complex	5	2	0.36	0.04485	up	CC
GO:0036284	tubulobulbar complex	5	2	0.36	0.04485	up	CC
GO:0097524	sperm plasma membrane	5	2	0.36	0.04485	up	CC
GO:0005739	mitochondrion	1618	189	116.65	0.0453	up	CC

## Sheet: Table S5
Table S5: Gene ontoloty term enrichment results for Z. viviparus time responsive genes. The number of 'annotated' and 'significant' refer to the term abundance in the gene universe (i.e., all genes tested for differential expression) and in the set of differentially expressed genes, respectively. The number of 'expected' genes denote the number of genes annotated with the respective GO term at ra…
GO ID	Term	Annotated	Significant	Expected	p-value	GO term category
GO:0006037	cell wall chitin metabolic process	5	5	0.13	1.3e-08	BP
GO:0010383	cell wall polysaccharide metabolic process	6	5	0.16	7.6e-08	BP
GO:0051607	defense response to virus	164	20	4.36	2.3e-07	BP
GO:0060337	type I interferon signaling pathway	50	13	1.33	1.1e-06	BP
GO:0032722	positive regulation of chemokine production	56	10	1.49	1.9e-06	BP
GO:0006032	chitin catabolic process	12	5	0.32	8.8e-06	BP
GO:0044245	polysaccharide digestion	13	5	0.35	1.4e-05	BP
GO:0060340	positive regulation of type I interferon-mediated signaling pathway	8	4	0.21	3.2e-05	BP
GO:0046677	response to antibiotic	463	28	12.32	4.5e-05	BP
GO:0051704	multi-organism process	2144	93	57.04	5e-05	BP
GO:0032496	response to lipopolysaccharide	370	24	9.84	5.4e-05	BP
GO:0045766	positive regulation of angiogenesis	179	15	4.76	8.8e-05	BP
GO:0030049	muscle filament sliding	43	7	1.14	0.00013	BP
GO:0001666	response to hypoxia	417	25	11.09	0.00013	BP
GO:0032355	response to estradiol	231	17	6.15	0.00015	BP
GO:0048102	autophagic cell death	13	4	0.35	0.00029	BP
GO:0009612	response to mechanical stimulus	307	25	8.17	0.00032	BP
GO:0009617	response to bacterium	580	40	15.43	0.00041	BP
GO:0071260	cellular response to mechanical stimulus	123	11	3.27	0.00044	BP
GO:0048661	positive regulation of smooth muscle cell proliferation	124	11	3.3	0.00047	BP
GO:0002252	immune effector process	1021	54	27.16	0.00055	BP
GO:0009266	response to temperature stimulus	241	16	6.41	0.00073	BP
GO:0032963	collagen metabolic process	111	10	2.95	0.00074	BP
GO:0002532	production of molecular mediator involved in inflammatory response	57	7	1.52	0.00075	BP
GO:0060429	epithelium development	1264	56	33.63	0.00088	BP
GO:0071409	cellular response to cycloheximide	8	3	0.21	0.00095	BP
GO:0019064	fusion of virus membrane with host plasma membrane	8	3	0.21	0.00095	BP
GO:0055093	response to hyperoxia	43	8	1.14	0.00103	BP
GO:0045089	positive regulation of innate immune response	236	19	6.28	0.00105	BP
GO:0006000	fructose metabolic process	18	4	0.48	0.00112	BP
GO:0070493	thrombin-activated receptor signaling pathway	19	4	0.51	0.00139	BP
GO:0043434	response to peptide hormone	605	29	16.1	0.0016	BP
GO:0043062	extracellular structure organization	388	21	10.32	0.00167	BP
GO:0043903	regulation of biological process involved in symbiotic interaction	251	19	6.68	0.00168	BP
GO:0010035	response to inorganic substance	772	44	20.54	0.00174	BP
GO:1990834	response to odorant	10	3	0.27	0.00195	BP
GO:0071277	cellular response to calcium ion	67	7	1.78	0.00196	BP
GO:0045655	regulation of monocyte differentiation	21	4	0.56	0.00206	BP
GO:0071372	cellular response to follicle-stimulating hormone stimulus	21	4	0.56	0.00206	BP
GO:0009615	response to virus	255	28	6.78	0.00217	BP
GO:0009749	response to glucose	296	17	7.88	0.00246	BP
GO:0032682	negative regulation of chemokine production	22	4	0.59	0.00246	BP
GO:0035987	endodermal cell differentiation	52	6	1.38	0.00247	BP
GO:0045824	negative regulation of innate immune response	52	6	1.38	0.00247	BP
GO:0097366	response to bronchodilator	70	7	1.86	0.00253	BP
GO:0034614	cellular response to reactive oxygen species	199	13	5.29	0.0026	BP
GO:0006642	triglyceride mobilization	11	3	0.29	0.00263	BP
GO:0001960	negative regulation of cytokine-mediated signaling pathway	53	6	1.41	0.00272	BP
GO:0034405	response to fluid shear stress	53	6	1.41	0.00272	BP
GO:0045069	regulation of viral genome replication	71	7	1.89	0.00274	BP
GO:0042632	cholesterol homeostasis	72	7	1.92	0.00297	BP
GO:0014072	response to isoquinoline alkaloid	54	6	1.44	0.00299	BP
GO:0009620	response to fungus	55	6	1.46	0.00328	BP
GO:0071379	cellular response to prostaglandin stimulus	24	4	0.64	0.00343	BP
GO:1904754	positive regulation of vascular associated smooth muscle cell migration	24	4	0.64	0.00343	BP
GO:0071732	cellular response to nitric oxide	24	4	0.64	0.00343	BP
GO:0008283	cell population proliferation	2029	79	53.98	0.00354	BP
GO:0097066	response to thyroid hormone	56	6	1.49	0.0036	BP
GO:0009887	animal organ morphogenesis	1104	46	29.37	0.0036	BP
GO:0001701	in utero embryonic development	458	26	12.19	0.00374	BP
GO:0007565	female pregnancy	258	15	6.86	0.00386	BP
GO:0045471	response to ethanol	209	13	5.56	0.00396	BP
GO:0032727	positive regulation of interferon-alpha production	25	4	0.67	0.004	BP
GO:0072300	positive regulation of metanephric glomerulus development	4	2	0.11	0.00409	BP
GO:0000301	retrograde transport, vesicle recycling within Golgi	4	2	0.11	0.00409	BP
GO:0039534	negative regulation of MDA-5 signaling pathway	4	2	0.11	0.00409	BP
GO:0071506	cellular response to mycophenolic acid	4	2	0.11	0.00409	BP
GO:2000182	regulation of progesterone biosynthetic process	4	2	0.11	0.00409	BP
GO:0070555	response to interleukin-1	186	12	4.95	0.00414	BP
GO:0007568	aging	448	22	11.92	0.00431	BP
GO:0042060	wound healing	590	27	15.7	0.00433	BP
GO:0071455	cellular response to hyperoxia	13	3	0.35	0.00438	BP
GO:0034141	positive regulation of toll-like receptor 3 signaling pathway	13	3	0.35	0.00438	BP
GO:0002679	respiratory burst involved in defense response	13	3	0.35	0.00438	BP
GO:0060334	regulation of interferon-gamma-mediated signaling pathway	26	4	0.69	0.00463	BP
GO:0006734	NADH metabolic process	59	6	1.57	0.00467	BP
GO:0035264	multicellular organism growth	190	12	5.06	0.0049	BP
GO:0000272	polysaccharide catabolic process	42	5	1.12	0.00491	BP
GO:0051235	maintenance of location	317	17	8.43	0.00492	BP
GO:0097435	supramolecular fiber organization	714	31	19	0.00499	BP
GO:0051591	response to cAMP	144	10	3.83	0.00514	BP
GO:0019359	nicotinamide nucleotide biosynthetic process	100	8	2.66	0.00516	BP
GO:0006096	glycolytic process	100	8	2.66	0.00516	BP
GO:0010737	protein kinase A signaling	27	4	0.72	0.00533	BP
GO:0002690	positive regulation of leukocyte chemotaxis	80	7	2.13	0.00535	BP
GO:0001944	vasculature development	773	43	20.57	0.00539	BP
GO:1902532	negative regulation of intracellular signal transduction	578	28	15.38	0.0054	BP
GO:0001886	endothelial cell morphogenesis	14	3	0.37	0.00546	BP
GO:0043032	positive regulation of macrophage activation	14	3	0.37	0.00546	BP
GO:0060100	positive regulation of phagocytosis, engulfment	14	3	0.37	0.00546	BP
GO:0060712	spongiotrophoblast layer development	14	3	0.37	0.00546	BP
GO:0034374	low-density lipoprotein particle remodeling	14	3	0.37	0.00546	BP
GO:1901653	cellular response to peptide	486	23	12.93	0.00553	BP
GO:0019674	NAD metabolic process	102	8	2.71	0.0058	BP
GO:0009142	nucleoside triphosphate biosynthetic process	195	12	5.19	0.00601	BP
GO:0007623	circadian rhythm	220	13	5.85	0.00606	BP
GO:0002764	immune response-regulating signaling pathway	407	25	10.83	0.00608	BP
GO:0071276	cellular response to cadmium ion	28	4	0.74	0.00609	BP
GO:0030317	flagellated sperm motility	63	6	1.68	0.00645	BP
GO:0036446	myofibroblast differentiation	5	2	0.13	0.00669	BP
GO:0036146	cellular response to mycotoxin	5	2	0.13	0.00669	BP
GO:0090074	negative regulation of protein homodimerization activity	5	2	0.13	0.00669	BP
GO:0071374	cellular response to parathyroid hormone stimulus	15	3	0.4	0.0067	BP
GO:0042532	negative regulation of tyrosine phosphorylation of STAT protein	15	3	0.4	0.0067	BP
GO:0019221	cytokine-mediated signaling pathway	622	41	16.55	0.00673	BP
GO:0070849	response to epidermal growth factor	65	6	1.73	0.0075	BP
GO:0002698	negative regulation of immune effector process	107	8	2.85	0.0077	BP
GO:0043467	regulation of generation of precursor metabolites and energy	130	9	3.46	0.00792	BP
GO:1900424	regulation of defense response to bacterium	22	5	0.59	0.00797	BP
GO:0046365	monosaccharide catabolic process	66	6	1.76	0.00807	BP
GO:0034145	positive regulation of toll-like receptor 4 signaling pathway	16	3	0.43	0.00808	BP
GO:0002274	myeloid leukocyte activation	609	29	16.2	0.00824	BP
GO:0002443	leukocyte mediated immunity	720	32	19.16	0.00831	BP
GO:0071229	cellular response to acid chemical	256	14	6.81	0.0087	BP
GO:0060713	labyrinthine layer morphogenesis	31	4	0.82	0.00879	BP
GO:0051272	positive regulation of cellular component movement	564	32	15.01	0.00893	BP
GO:0002263	cell activation involved in immune response	655	28	17.43	0.00913	BP
GO:0030154	cell differentiation	3899	134	103.74	0.00922	BP
GO:0035970	peptidyl-threonine dephosphorylation	17	3	0.45	0.00962	BP
GO:0070963	positive regulation of neutrophil mediated killing of gram-negative bacterium	6	2	0.16	0.00986	BP
GO:0032815	negative regulation of natural killer cell activation	6	2	0.16	0.00986	BP
GO:1903142	positive regulation of establishment of endothelial barrier	6	2	0.16	0.00986	BP
GO:0044691	tooth eruption	6	2	0.16	0.00986	BP
GO:0009446	putrescine biosynthetic process	6	2	0.16	0.00986	BP
GO:0034371	chylomicron remodeling	6	2	0.16	0.00986	BP
GO:2000535	regulation of entry of bacterium into host cell	6	2	0.16	0.00986	BP
GO:0042325	regulation of phosphorylation	1475	56	39.24	0.01	BP
GO:0042119	neutrophil activation	483	22	12.85	0.01008	BP
GO:0009408	response to heat	159	10	4.23	0.01009	BP
GO:0043299	leukocyte degranulation	514	23	13.68	0.01053	BP
GO:0045185	maintenance of protein location	113	8	3.01	0.01055	BP
GO:0071375	cellular response to peptide hormone stimulus	429	20	11.41	0.01093	BP
GO:0071236	cellular response to antibiotic	186	11	4.95	0.01107	BP
GO:0042110	T cell activation	459	21	12.21	0.01126	BP
GO:0036230	granulocyte activation	488	22	12.98	0.01127	BP
GO:0072567	chemokine (C-X-C motif) ligand 2 production	18	3	0.48	0.01132	BP
GO:0046597	negative regulation of viral entry into host cell	18	3	0.48	0.01132	BP
GO:0010269	response to selenium ion	18	3	0.48	0.01132	BP
GO:0006941	striated muscle contraction	187	11	4.98	0.01149	BP
GO:2000147	positive regulation of cell motility	546	31	14.53	0.01158	BP
GO:0045229	external encapsulating structure organization	347	17	9.23	0.01164	BP
GO:0051261	protein depolymerization	115	8	3.06	0.01166	BP
GO:0032570	response to progesterone	93	7	2.47	0.01193	BP
GO:0001817	regulation of cytokine production	638	40	16.97	0.01203	BP
GO:0060992	response to fungicide	34	4	0.9	0.01217	BP
GO:0042542	response to hydrogen peroxide	190	11	5.06	0.01283	BP
GO:2000060	positive regulation of ubiquitin-dependent protein catabolic process	117	8	3.11	0.01285	BP
GO:1904705	regulation of vascular associated smooth muscle cell proliferation	53	5	1.41	0.01308	BP
GO:0007010	cytoskeleton organization	1339	49	35.63	0.01308	BP
GO:0006735	NADH regeneration	35	4	0.93	0.01346	BP
GO:0016321	female meiosis chromosome segregation	7	2	0.19	0.01357	BP
GO:0010748	negative regulation of long-chain fatty acid import across plasma membrane	7	2	0.19	0.01357	BP
GO:0010886	positive regulation of cholesterol storage	7	2	0.19	0.01357	BP
GO:1900084	regulation of peptidyl-tyrosine autophosphorylation	7	2	0.19	0.01357	BP
GO:2001198	regulation of dendritic cell differentiation	7	2	0.19	0.01357	BP
GO:1900135	positive regulation of renin secretion into blood stream	7	2	0.19	0.01357	BP
GO:0140213	negative regulation of long-chain fatty acid import into cell	7	2	0.19	0.01357	BP
GO:0043311	positive regulation of eosinophil degranulation	7	2	0.19	0.01357	BP
GO:0044860	protein localization to plasma membrane raft	7	2	0.19	0.01357	BP
GO:0071504	cellular response to heparin	7	2	0.19	0.01357	BP
GO:0061043	regulation of vascular wound healing	7	2	0.19	0.01357	BP
GO:0030050	vesicle transport along actin filament	7	2	0.19	0.01357	BP
GO:0034447	very-low-density lipoprotein particle clearance	7	2	0.19	0.01357	BP
GO:1902568	positive regulation of eosinophil activation	7	2	0.19	0.01357	BP
GO:0031960	response to corticosteroid	298	15	7.93	0.01376	BP
GO:0002757	immune response-activating signal transduction	326	16	8.67	0.01392	BP
GO:0051385	response to mineralocorticoid	54	5	1.44	0.01411	BP
GO:0031663	lipopolysaccharide-mediated signaling pathway	54	5	1.44	0.01411	BP
GO:0002366	leukocyte activation involved in immune response	648	27	17.24	0.01414	BP
GO:0032869	cellular response to insulin stimulus	273	14	7.26	0.01467	BP
GO:0032757	positive regulation of interleukin-8 production	55	5	1.46	0.01519	BP
GO:1990874	vascular associated smooth muscle cell proliferation	55	5	1.46	0.01519	BP
GO:0022617	extracellular matrix disassembly	76	6	2.02	0.0156	BP
GO:0030335	positive regulation of cell migration	530	30	14.1	0.01569	BP
GO:0032868	response to insulin	359	17	9.55	0.01581	BP
GO:1904707	positive regulation of vascular associated smooth muscle cell proliferation	37	4	0.98	0.01629	BP
GO:0030834	regulation of actin filament depolymerization	56	5	1.49	0.01633	BP
GO:0035456	response to interferon-beta	21	3	0.56	0.01741	BP
GO:0101023	vascular endothelial cell proliferation	21	3	0.56	0.01741	BP
GO:1905562	regulation of vascular endothelial cell proliferation	21	3	0.56	0.01741	BP
GO:0019320	hexose catabolic process	57	5	1.52	0.01752	BP
GO:0042866	pyruvate biosynthetic process	57	5	1.52	0.01752	BP
GO:1902949	positive regulation of tau-protein kinase activity	8	2	0.21	0.01777	BP
GO:0045906	negative regulation of vasoconstriction	8	2	0.21	0.01777	BP
GO:0060385	axonogenesis involved in innervation	8	2	0.21	0.01777	BP
GO:0060426	lung vasculature development	8	2	0.21	0.01777	BP
GO:0010944	negative regulation of transcription by competitive promoter binding	8	2	0.21	0.01777	BP
GO:0071421	manganese ion transmembrane transport	8	2	0.21	0.01777	BP
GO:0072584	caveolin-mediated endocytosis	8	2	0.21	0.01777	BP
GO:0006335	DNA replication-dependent nucleosome assembly	8	2	0.21	0.01777	BP
GO:0071873	response to norepinephrine	8	2	0.21	0.01777	BP
GO:2000051	negative regulation of non-canonical Wnt signaling pathway	8	2	0.21	0.01777	BP
GO:0035627	ceramide transport	8	2	0.21	0.01777	BP
GO:0034140	negative regulation of toll-like receptor 3 signaling pathway	8	2	0.21	0.01777	BP
GO:0034723	DNA replication-dependent nucleosome organization	8	2	0.21	0.01777	BP
GO:0060236	regulation of mitotic spindle organization	38	4	1.01	0.01784	BP
GO:0008219	cell death	2226	79	59.22	0.01788	BP
GO:0071347	cellular response to interleukin-1	149	9	3.96	0.01816	BP
GO:0055081	anion homeostasis	58	5	1.54	0.01877	BP
GO:0051384	response to glucocorticoid	282	14	7.5	0.0189	BP
GO:0001818	negative regulation of cytokine production	252	16	6.7	0.01896	BP
GO:0031099	regeneration	310	15	8.25	0.01901	BP
GO:0032436	positive regulation of proteasomal ubiquitin-dependent protein catabolic process	102	7	2.71	0.01902	BP
GO:0002286	T cell activation involved in immune response	80	6	2.13	0.01964	BP
GO:0030097	hemopoiesis	980	40	26.07	0.01976	BP
GO:0019400	alditol metabolic process	22	3	0.59	0.01976	BP
GO:0045109	intermediate filament organization	22	3	0.59	0.01976	BP
GO:1901654	response to ketone	351	19	9.34	0.02003	BP
GO:0071222	cellular response to lipopolysaccharide	177	10	4.71	0.02008	BP
GO:0052372	modulation by symbiont of entry into host	87	8	2.31	0.02028	BP
GO:0050900	leukocyte migration	369	21	9.82	0.02047	BP
GO:0046596	regulation of viral entry into host cell	81	6	2.16	0.02076	BP
GO:0040017	positive regulation of locomotion	574	31	15.27	0.02113	BP
GO:0032602	chemokine production	86	15	2.29	0.02114	BP
GO:0030574	collagen catabolic process	40	4	1.06	0.02119	BP
GO:0006007	glucose catabolic process	40	4	1.06	0.02119	BP
GO:0033344	cholesterol efflux	40	4	1.06	0.02119	BP
GO:0071216	cellular response to biotic stimulus	205	11	5.45	0.02138	BP
GO:0051493	regulation of cytoskeleton organization	550	23	14.63	0.02173	BP
GO:0002043	blood vessel endothelial cell proliferation involved in sprouting angiogenesis	23	3	0.61	0.02229	BP
GO:0046886	positive regulation of hormone biosynthetic process	23	3	0.61	0.02229	BP
GO:0070102	interleukin-6-mediated signaling pathway	23	3	0.61	0.02229	BP
GO:0045821	positive regulation of glycolytic process	23	3	0.61	0.02229	BP
GO:0050688	regulation of defense response to virus	65	7	1.73	0.02239	BP
GO:0010746	regulation of long-chain fatty acid import across plasma membrane	9	2	0.24	0.02245	BP
GO:0010739	positive regulation of protein kinase A signaling	9	2	0.24	0.02245	BP
GO:0045657	positive regulation of monocyte differentiation	9	2	0.24	0.02245	BP
GO:0140212	regulation of long-chain fatty acid import into cell	9	2	0.24	0.02245	BP
GO:0039536	negative regulation of RIG-I signaling pathway	9	2	0.24	0.02245	BP
GO:0043309	regulation of eosinophil degranulation	9	2	0.24	0.02245	BP
GO:0051549	positive regulation of keratinocyte migration	9	2	0.24	0.02245	BP
GO:0071503	response to heparin	9	2	0.24	0.02245	BP
GO:0097029	mature conventional dendritic cell differentiation	9	2	0.24	0.02245	BP
GO:0034465	response to carbon monoxide	9	2	0.24	0.02245	BP
GO:0042327	positive regulation of phosphorylation	991	37	26.37	0.02258	BP
GO:0043648	dicarboxylic acid metabolic process	130	8	3.46	0.02282	BP
GO:0042742	defense response to bacterium	179	14	4.76	0.02285	BP
GO:0016525	negative regulation of angiogenesis	106	7	2.82	0.02297	BP
GO:0060840	artery development	106	7	2.82	0.02297	BP
GO:0030198	extracellular matrix organization	346	16	9.21	0.02299	BP
GO:0090224	regulation of spindle organization	41	4	1.09	0.023	BP
GO:1990776	response to angiotensin	41	4	1.09	0.023	BP
GO:0002275	myeloid cell activation involved in immune response	523	22	13.91	0.02308	BP
GO:0009201	ribonucleoside triphosphate biosynthetic process	182	10	4.84	0.02382	BP
GO:0072347	response to anesthetic	107	7	2.85	0.02404	BP
GO:0001570	vasculogenesis	107	7	2.85	0.02404	BP
GO:0009636	response to toxic substance	625	27	16.63	0.02404	BP
GO:0060324	face development	62	5	1.65	0.02434	BP
GO:0071219	cellular response to molecule of bacterial origin	183	10	4.87	0.02463	BP
GO:0000122	negative regulation of transcription by RNA polymerase II	806	31	21.44	0.02481	BP
GO:0030857	negative regulation of epithelial cell differentiation	42	4	1.12	0.02491	BP
GO:0071378	cellular response to growth hormone stimulus	42	4	1.12	0.02491	BP
GO:0006887	exocytosis	838	32	22.3	0.02492	BP
GO:0034616	response to laminar fluid shear stress	24	3	0.64	0.02498	BP
GO:0030813	positive regulation of nucleotide catabolic process	24	3	0.64	0.02498	BP
GO:0042127	regulation of cell population proliferation	1617	62	43.02	0.02507	BP
GO:0019725	cellular homeostasis	935	35	24.88	0.02533	BP
GO:0050829	defense response to Gram-negative bacterium	69	7	1.84	0.02537	BP
GO:0031667	response to nutrient levels	682	27	18.15	0.02545	BP
GO:0071869	response to catecholamine	85	6	2.26	0.02564	BP
GO:0055088	lipid homeostasis	115	11	3.06	0.02566	BP
GO:0045055	regulated exocytosis	714	28	19	0.02577	BP
GO:0030042	actin filament depolymerization	63	5	1.68	0.02588	BP
GO:0001932	regulation of protein phosphorylation	1354	50	36.02	0.02591	BP
GO:0045321	leukocyte activation	1134	51	30.17	0.02608	BP
GO:2000181	negative regulation of blood vessel morphogenesis	109	7	2.9	0.02628	BP
GO:0031100	animal organ regeneration	159	9	4.23	0.02637	BP
GO:0006754	ATP biosynthetic process	159	9	4.23	0.02637	BP
GO:0070950	regulation of neutrophil mediated killing of bacterium	7	3	0.19	0.02647	BP
GO:0070951	regulation of neutrophil mediated killing of gram-negative bacterium	7	3	0.19	0.02647	BP
GO:0001568	blood vessel development	731	39	19.45	0.02651	BP
GO:0000278	mitotic cell cycle	1068	39	28.42	0.02658	BP
GO:0060048	cardiac muscle contraction	134	8	3.57	0.02676	BP
GO:0016999	antibiotic metabolic process	134	8	3.57	0.02676	BP
GO:0045104	intermediate filament cytoskeleton organization	43	4	1.14	0.0269	BP
GO:1901879	regulation of protein depolymerization	86	6	2.29	0.02697	BP
GO:0071867	response to monoamine	86	6	2.29	0.02697	BP
GO:0009896	positive regulation of catabolic process	562	23	14.95	0.02703	BP
GO:0030856	regulation of epithelial cell differentiation	141	10	3.75	0.02707	BP
GO:0007167	enzyme linked receptor protein signaling pathway	1038	38	27.62	0.02746	BP
GO:0010744	positive regulation of macrophage derived foam cell differentiation	10	2	0.27	0.02758	BP
GO:0060339	negative regulation of type I interferon-mediated signaling pathway	10	2	0.27	0.02758	BP
GO:0071317	cellular response to isoquinoline alkaloid	10	2	0.27	0.02758	BP
GO:0099515	actin filament-based transport	10	2	0.27	0.02758	BP
GO:1900115	extracellular regulation of signal transduction	10	2	0.27	0.02758	BP
GO:1900116	extracellular negative regulation of signal transduction	10	2	0.27	0.02758	BP
GO:1900133	regulation of renin secretion into blood stream	10	2	0.27	0.02758	BP
GO:0043308	eosinophil degranulation	10	2	0.27	0.02758	BP
GO:0060710	chorio-allantoic fusion	10	2	0.27	0.02758	BP
GO:0022027	interkinetic nuclear migration	10	2	0.27	0.02758	BP
GO:0003104	positive regulation of glomerular filtration	10	2	0.27	0.02758	BP
GO:0071888	macrophage apoptotic process	10	2	0.27	0.02758	BP
GO:0002447	eosinophil mediated immunity	10	2	0.27	0.02758	BP
GO:0034378	chylomicron assembly	10	2	0.27	0.02758	BP
GO:0002278	eosinophil activation involved in immune response	10	2	0.27	0.02758	BP
GO:1902566	regulation of eosinophil activation	10	2	0.27	0.02758	BP
GO:1901615	organic hydroxy compound metabolic process	533	22	14.18	0.02779	BP
GO:0042430	indole-containing compound metabolic process	25	3	0.67	0.02785	BP
GO:0030002	cellular anion homeostasis	25	3	0.67	0.02785	BP
GO:0030320	cellular monovalent inorganic anion homeostasis	25	3	0.67	0.02785	BP
GO:0071356	cellular response to tumor necrosis factor	241	12	6.41	0.02792	BP
GO:0002697	regulation of immune effector process	359	22	9.55	0.02795	BP
GO:0001935	endothelial cell proliferation	161	9	4.28	0.02828	BP
GO:0097028	dendritic cell differentiation	44	4	1.17	0.02899	BP
GO:0042269	regulation of natural killer cell mediated cytotoxicity	44	4	1.17	0.02899	BP
GO:0002715	regulation of natural killer cell mediated immunity	44	4	1.17	0.02899	BP
GO:0035094	response to nicotine	65	5	1.73	0.02915	BP
GO:0008284	positive regulation of cell population proliferation	895	40	23.81	0.02925	BP
GO:0071456	cellular response to hypoxia	189	10	5.03	0.02988	BP
GO:0002699	positive regulation of immune effector process	196	12	5.21	0.02989	BP
GO:0045216	cell-cell junction organization	300	14	7.98	0.03006	BP
GO:0032352	positive regulation of hormone metabolic process	26	3	0.69	0.03087	BP
GO:0071498	cellular response to fluid shear stress	26	3	0.69	0.03087	BP
GO:1902001	fatty acid transmembrane transport	26	3	0.69	0.03087	BP
GO:0097067	cellular response to thyroid hormone stimulus	26	3	0.69	0.03087	BP
GO:0050830	defense response to Gram-positive bacterium	66	5	1.76	0.03088	BP
GO:0071396	cellular response to lipid	726	28	19.32	0.03104	BP
GO:0043549	regulation of kinase activity	886	33	23.57	0.03128	BP
GO:1903364	positive regulation of cellular protein catabolic process	164	9	4.36	0.03133	BP
GO:0098586	cellular response to virus	50	6	1.33	0.03289	BP
GO:0060059	embryonic retina morphogenesis in camera-type eye	11	2	0.29	0.03313	BP
GO:0043307	eosinophil activation	11	2	0.29	0.03313	BP
GO:0060600	dichotomous subdivision of an epithelial terminal unit	11	2	0.29	0.03313	BP
GO:0090084	negative regulation of inclusion body assembly	11	2	0.29	0.03313	BP
GO:0061042	vascular wound healing	11	2	0.29	0.03313	BP
GO:0017000	antibiotic biosynthetic process	11	2	0.29	0.03313	BP
GO:0034137	positive regulation of toll-like receptor 2 signaling pathway	11	2	0.29	0.03313	BP
GO:1904044	response to aldosterone	11	2	0.29	0.03313	BP
GO:0007178	transmembrane receptor protein serine/threonine kinase signaling pathway	333	15	8.86	0.03316	BP
GO:0048534	hematopoietic or lymphoid organ development	1019	40	27.11	0.03339	BP
GO:0036120	cellular response to platelet-derived growth factor stimulus	46	4	1.22	0.03346	BP
GO:0001937	negative regulation of endothelial cell proliferation	46	4	1.22	0.03346	BP
GO:0045103	intermediate filament-based process	46	4	1.22	0.03346	BP
GO:0007015	actin filament organization	422	18	11.23	0.03347	BP
GO:1903052	positive regulation of proteolysis involved in cellular protein catabolic process	140	8	3.72	0.03352	BP
GO:0001936	regulation of endothelial cell proliferation	140	8	3.72	0.03352	BP
GO:0043244	regulation of protein-containing complex disassembly	115	7	3.06	0.03384	BP
GO:0071404	cellular response to low-density lipoprotein particle stimulus	27	3	0.72	0.03407	BP
GO:2000810	regulation of bicellular tight junction assembly	27	3	0.72	0.03407	BP
GO:0032611	interleukin-1 beta production	91	6	2.42	0.0343	BP
GO:0002702	positive regulation of production of molecular mediator of immune response	91	6	2.42	0.0343	BP
GO:0002449	lymphocyte mediated immunity	221	11	5.88	0.03448	BP
GO:0030334	regulation of cell migration	855	39	22.75	0.03448	BP
GO:0032677	regulation of interleukin-8 production	68	5	1.81	0.03452	BP
GO:0002253	activation of immune response	394	17	10.48	0.03473	BP
GO:0048514	blood vessel morphogenesis	647	34	17.21	0.03476	BP
GO:0030036	actin cytoskeleton organization	703	27	18.7	0.03536	BP
GO:0006979	response to oxidative stress	513	27	13.65	0.03546	BP
GO:0071345	cellular response to cytokine stimulus	985	56	26.21	0.03564	BP
GO:0036119	response to platelet-derived growth factor	47	4	1.25	0.03583	BP
GO:0032480	negative regulation of type I interferon production	47	4	1.25	0.03583	BP
GO:0060674	placenta blood vessel development	47	4	1.25	0.03583	BP
GO:0034260	negative regulation of GTPase activity	47	4	1.25	0.03583	BP
GO:0015918	sterol transport	92	6	2.45	0.0359	BP
GO:0046686	response to cadmium ion	76	8	2.02	0.0372	BP
GO:0043123	positive regulation of I-kappaB kinase/NF-kappaB signaling	143	8	3.8	0.0373	BP
GO:0002758	innate immune response-activating signal transduction	143	8	3.8	0.0373	BP
GO:0002446	neutrophil mediated immunity	497	22	13.22	0.0374	BP
GO:0051338	regulation of transferase activity	997	36	26.53	0.0374	BP
GO:0048147	negative regulation of fibroblast proliferation	28	3	0.74	0.03742	BP
GO:0140354	lipid import into cell	28	3	0.74	0.03742	BP
GO:0044539	long-chain fatty acid import into cell	28	3	0.74	0.03742	BP
GO:0042402	cellular biogenic amine catabolic process	28	3	0.74	0.03742	BP
GO:0046697	decidualization	28	3	0.74	0.03742	BP
GO:0010038	response to metal ion	439	25	11.68	0.03745	BP
GO:0002009	morphogenesis of an epithelium	644	25	17.13	0.03764	BP
GO:0048545	response to steroid hormone	613	24	16.31	0.03787	BP
GO:0045834	positive regulation of lipid metabolic process	170	9	4.52	0.0381	BP
GO:0043627	response to estrogen	118	7	3.14	0.03811	BP
GO:0000302	response to reactive oxygen species	295	19	7.85	0.03903	BP
GO:1902947	regulation of tau-protein kinase activity	12	2	0.32	0.03906	BP
GO:1903044	protein localization to membrane raft	12	2	0.32	0.03906	BP
GO:0019852	L-ascorbic acid metabolic process	12	2	0.32	0.03906	BP
GO:0071830	triglyceride-rich lipoprotein particle clearance	12	2	0.32	0.03906	BP
GO:0051547	regulation of keratinocyte migration	12	2	0.32	0.03906	BP
GO:0034382	chylomicron remnant clearance	12	2	0.32	0.03906	BP
GO:0042118	endothelial cell activation	12	2	0.32	0.03906	BP
GO:2000192	negative regulation of fatty acid transport	12	2	0.32	0.03906	BP
GO:1901334	lactone metabolic process	12	2	0.32	0.03906	BP
GO:0008078	mesodermal cell migration	12	2	0.32	0.03906	BP
GO:0010757	negative regulation of plasminogen activation	12	2	0.32	0.03906	BP
GO:0001649	osteoblast differentiation	198	10	5.27	0.03918	BP
GO:0070661	leukocyte proliferation	254	12	6.76	0.03938	BP
GO:0002520	immune system development	1066	41	28.36	0.03968	BP
GO:0002706	regulation of lymphocyte mediated immunity	145	8	3.86	0.03997	BP
GO:0071398	cellular response to fatty acid	71	5	1.89	0.04047	BP
GO:0019915	lipid storage	71	5	1.89	0.04047	BP
GO:0016477	cell migration	1404	55	37.35	0.04057	BP
GO:0007157	heterophilic cell-cell adhesion via plasma membrane cell adhesion molecules	49	4	1.3	0.04086	BP
GO:0055083	monovalent inorganic anion homeostasis	29	3	0.77	0.04094	BP
GO:0009310	amine catabolic process	29	3	0.77	0.04094	BP
GO:0042180	cellular ketone metabolic process	205	12	5.45	0.0414	BP
GO:0060047	heart contraction	257	12	6.84	0.04243	BP
GO:0009435	NAD biosynthetic process	72	5	1.92	0.04258	BP
GO:0007052	mitotic spindle organization	121	7	3.22	0.04272	BP
GO:0009991	response to extracellular stimulus	716	27	19.05	0.0428	BP
GO:0002444	myeloid leukocyte mediated immunity	536	23	14.26	0.04296	BP
GO:0048870	cell motility	1524	62	40.55	0.04308	BP
GO:0051674	localization of cell	1524	62	40.55	0.04308	BP
GO:1903047	mitotic cell cycle process	878	32	23.36	0.04327	BP
GO:0043312	neutrophil degranulation	466	19	12.4	0.04331	BP
GO:0006915	apoptotic process	1991	65	52.97	0.04341	BP
GO:0031331	positive regulation of cellular catabolic process	497	20	13.22	0.0435	BP
GO:0090504	epiboly	50	4	1.33	0.04352	BP
GO:0032613	interleukin-10 production	50	4	1.33	0.04352	BP
GO:0001934	positive regulation of protein phosphorylation	944	34	25.12	0.04368	BP
GO:0070507	regulation of microtubule cytoskeleton organization	202	10	5.37	0.0439	BP
GO:0002285	lymphocyte activation involved in immune response	148	8	3.94	0.04422	BP
GO:0070613	regulation of protein processing	122	7	3.25	0.04433	BP
GO:2000145	regulation of cell motility	906	40	24.1	0.0444	BP
GO:1901888	regulation of cell junction assembly	175	9	4.66	0.04446	BP
GO:0009206	purine ribonucleoside triphosphate biosynthetic process	175	9	4.66	0.04446	BP
GO:0033137	negative regulation of peptidyl-serine phosphorylation	30	3	0.8	0.04463	BP
GO:0019835	cytolysis	30	3	0.8	0.04463	BP
GO:0002724	regulation of T cell cytokine production	30	3	0.8	0.04463	BP
GO:0032755	positive regulation of interleukin-6 production	73	5	1.94	0.04476	BP
GO:0034097	response to cytokine	1092	61	29.05	0.04487	BP
GO:0036294	cellular response to decreased oxygen levels	203	10	5.4	0.04513	BP
GO:0032823	regulation of natural killer cell differentiation	13	2	0.35	0.04537	BP
GO:0039535	regulation of RIG-I signaling pathway	13	2	0.35	0.04537	BP
GO:0002001	renin secretion into blood stream	13	2	0.35	0.04537	BP
GO:0046487	glyoxylate metabolic process	13	2	0.35	0.04537	BP
GO:0097068	response to thyroxine	13	2	0.35	0.04537	BP
GO:0042428	serotonin metabolic process	13	2	0.35	0.04537	BP
GO:0006703	estrogen biosynthetic process	13	2	0.35	0.04537	BP
GO:0070307	lens fiber cell development	13	2	0.35	0.04537	BP
GO:0051918	negative regulation of fibrinolysis	13	2	0.35	0.04537	BP
GO:0031953	negative regulation of protein autophosphorylation	13	2	0.35	0.04537	BP
GO:1901800	positive regulation of proteasomal protein catabolic process	123	7	3.27	0.04599	BP
GO:0046649	lymphocyte activation	635	26	16.89	0.04611	BP
GO:0043278	response to morphine	51	4	1.36	0.04627	BP
GO:0042743	hydrogen peroxide metabolic process	51	4	1.36	0.04627	BP
GO:0070741	response to interleukin-6	51	4	1.36	0.04627	BP
GO:0044248	cellular catabolic process	2313	74	61.54	0.04673	BP
GO:0007204	positive regulation of cytosolic calcium ion concentration	261	12	6.94	0.04676	BP
GO:0007051	spindle organization	177	9	4.71	0.04719	BP
GO:0009145	purine nucleoside triphosphate biosynthetic process	177	9	4.71	0.04719	BP
GO:1903317	regulation of protein maturation	124	7	3.3	0.04768	BP
GO:1901343	negative regulation of vasculature development	124	7	3.3	0.04768	BP
GO:0002700	regulation of production of molecular mediator of immune response	124	7	3.3	0.04768	BP
GO:0043086	negative regulation of catalytic activity	756	28	20.11	0.04782	BP
GO:0002283	neutrophil activation involved in immune response	472	19	12.56	0.04814	BP
GO:0032787	monocarboxylic acid metabolic process	611	28	16.26	0.04825	BP
GO:0046006	regulation of activated T cell proliferation	31	3	0.82	0.04847	BP
GO:0006103	2-oxoglutarate metabolic process	31	3	0.82	0.04847	BP
GO:0018149	peptide cross-linking	31	3	0.82	0.04847	BP
GO:0034377	plasma lipoprotein particle assembly	31	3	0.82	0.04847	BP
GO:1903671	negative regulation of sprouting angiogenesis	31	3	0.82	0.04847	BP
GO:1902624	positive regulation of neutrophil migration	31	3	0.82	0.04847	BP
GO:0065009	regulation of molecular function	3155	99	83.94	0.04893	BP
GO:0030811	regulation of nucleotide catabolic process	52	4	1.38	0.04912	BP
GO:0006110	regulation of glycolytic process	52	4	1.38	0.04912	BP
GO:0042326	negative regulation of phosphorylation	523	23	13.91	0.04916	BP
GO:0010332	response to gamma radiation	75	5	2	0.04931	BP
GO:0102148	N-acetyl-beta-D-galactosaminidase activity	8	5	0.22	7.9e-07	MF
GO:0003796	lysozyme activity	9	5	0.25	1.7e-06	MF
GO:0004563	beta-N-acetylhexosaminidase activity	11	5	0.3	6.1e-06	MF
GO:0008061	chitin binding	12	5	0.33	1e-05	MF
GO:0004568	chitinase activity	12	5	0.33	1e-05	MF
GO:0016936	galactoside binding	9	3	0.25	0.00152	MF
GO:0017017	MAP kinase tyrosine/serine/threonine phosphatase activity	11	3	0.3	0.00287	MF
GO:0000979	RNA polymerase II core promoter sequence-specific DNA binding	23	4	0.63	0.00326	MF
GO:0071535	RING-like zinc finger domain binding	4	2	0.11	0.00434	MF
GO:0030984	kininogen binding	4	2	0.11	0.00434	MF
GO:0035473	lipase binding	4	2	0.11	0.00434	MF
GO:0001968	fibronectin binding	40	5	1.1	0.00452	MF
GO:0003777	microtubule motor activity	98	8	2.69	0.00546	MF
GO:0015248	sterol transporter activity	28	4	0.77	0.00678	MF
GO:0004127	cytidylate kinase activity	5	2	0.14	0.00711	MF
GO:0044729	hemi-methylated DNA-binding	5	2	0.14	0.00711	MF
GO:0008017	microtubule binding	247	14	6.78	0.00829	MF
GO:0019838	growth factor binding	152	10	4.17	0.00913	MF
GO:0050839	cell adhesion molecule binding	250	14	6.86	0.00917	MF
GO:0010385	double-stranded methylated DNA binding	6	2	0.16	0.01047	MF
GO:0051015	actin filament binding	181	11	4.97	0.01129	MF
GO:0051287	NAD binding	70	6	1.92	0.01227	MF
GO:1990841	promoter-specific chromatin binding	51	5	1.4	0.01263	MF
GO:0003950	NAD+ ADP-ribosyltransferase activity	19	3	0.52	0.01432	MF
GO:0005516	calmodulin binding	190	11	5.21	0.01576	MF
GO:0008307	structural constituent of muscle	54	5	1.48	0.01592	MF
GO:0015026	coreceptor activity	36	4	0.99	0.01643	MF
GO:0043539	protein serine/threonine kinase activator activity	36	4	0.99	0.01643	MF
GO:0016887	ATP hydrolysis activity	406	19	11.14	0.01662	MF
GO:0019899	enzyme binding	2532	87	69.49	0.01807	MF
GO:0020037	heme binding	98	7	2.69	0.01812	MF
GO:0004745	NAD-retinol dehydrogenase activity	8	2	0.22	0.01885	MF
GO:0008395	steroid hydroxylase activity	21	3	0.58	0.01888	MF
GO:0005518	collagen binding	79	6	2.17	0.02124	MF
GO:0000146	microfilament motor activity	23	3	0.63	0.02416	MF
GO:0046906	tetrapyrrole binding	105	7	2.88	0.02539	MF
GO:0015057	thrombin-activated receptor activity	10	2	0.27	0.02921	MF
GO:0097001	ceramide binding	10	2	0.27	0.02921	MF
GO:0046624	sphingolipid transporter activity	10	2	0.27	0.02921	MF
GO:0032795	heterotrimeric G-protein binding	10	2	0.27	0.02921	MF
GO:0030506	ankyrin binding	25	3	0.69	0.03014	MF
GO:0019955	cytokine binding	87	6	2.39	0.03224	MF
GO:0005112	Notch binding	26	3	0.71	0.0334	MF
GO:0032027	myosin light chain binding	11	2	0.3	0.03507	MF
GO:0005520	insulin-like growth factor binding	27	3	0.74	0.03683	MF
GO:0046914	transition metal ion binding	970	36	26.62	0.03858	MF
GO:0016616	oxidoreductase activity, acting on the CH-OH group of donors, NAD or NADP as acceptor	115	7	3.16	0.03892	MF
GO:0005102	signaling receptor binding	1438	52	39.47	0.04021	MF
GO:0030246	carbohydrate binding	220	11	6.04	0.04037	MF
GO:0050750	low-density lipoprotein particle receptor binding	28	3	0.77	0.04044	MF
GO:0008201	heparin binding	167	9	4.58	0.04075	MF
GO:0004303	estradiol 17-beta-dehydrogenase activity	13	2	0.36	0.04798	MF

## Sheet: Table S6
Table S6: Gene ontoloty term enrichment results for Z. viviparus genes that are differentially expressed between populations from Darss vs. Meldorf Bay. The number of 'annotated' and 'significant' refer to the term abundance in the gene universe (i.e., all genes tested for differential expression) and in the set of differentially expressed genes, respectively. The number of 'expected' genes denot…
GO ID	Term	Annotated	Significant	Expected	p-value	regulaton	GO term category
GO:0006614	SRP-dependent cotranslational protein targeting to membrane	71	59	5.32	1e-30	down	BP
GO:0000184	nuclear-transcribed mRNA catabolic process, nonsense-mediated decay	104	63	7.79	1e-30	down	BP
GO:0006413	translational initiation	180	85	13.48	1e-30	down	BP
GO:0002181	cytoplasmic translation	80	42	5.99	6.5e-23	down	BP
GO:0006364	rRNA processing	193	92	14.45	3.3e-22	down	BP
GO:0000027	ribosomal large subunit assembly	28	20	2.1	4.5e-17	down	BP
GO:0000028	ribosomal small subunit assembly	19	15	1.42	3.4e-14	down	BP
GO:0006957	complement activation, alternative pathway	14	12	1.05	2.3e-12	down	BP
GO:0050829	defense response to Gram-negative bacterium	69	25	5.17	9.2e-12	down	BP
GO:0000462	maturation of SSU-rRNA from tricistronic rRNA transcript (SSU-rRNA, 5.8S rRNA, LSU-rRNA)	36	20	2.7	8.2e-11	down	BP
GO:0006958	complement activation, classical pathway	24	14	1.8	1.5e-10	down	BP
GO:0007597	blood coagulation, intrinsic pathway	24	14	1.8	1.5e-10	down	BP
GO:2000257	regulation of protein activation cascade	46	23	3.44	3.1e-10	down	BP
GO:0097421	liver regeneration	71	22	5.32	4.9e-09	down	BP
GO:0030449	regulation of complement activation	44	22	3.29	5.2e-09	down	BP
GO:0002673	regulation of acute inflammatory response	89	30	6.66	6.3e-09	down	BP
GO:0000470	maturation of LSU-rRNA	25	18	1.87	1e-08	down	BP
GO:0000463	maturation of LSU-rRNA from tricistronic rRNA transcript (SSU-rRNA, 5.8S rRNA, LSU-rRNA)	10	8	0.75	3.8e-08	down	BP
GO:0032620	interleukin-17 production	31	13	2.32	1.2e-07	down	BP
GO:0070613	regulation of protein processing	122	32	9.13	4.8e-07	down	BP
GO:2000059	negative regulation of ubiquitin-dependent protein catabolic process	97	23	7.26	5.3e-07	down	BP
GO:0032020	ISG15-protein conjugation	7	6	0.52	1.1e-06	down	BP
GO:1904401	cellular response to Thyroid stimulating hormone	5	5	0.37	2.3e-06	down	BP
GO:0060333	interferon-gamma-mediated signaling pathway	120	24	8.99	7.6e-06	down	BP
GO:0002576	platelet degranulation	129	25	9.66	8.9e-06	down	BP
GO:0042273	ribosomal large subunit biogenesis	66	42	4.94	1e-05	down	BP
GO:0075525	viral translational termination-reinitiation	6	5	0.45	1.3e-05	down	BP
GO:0000466	maturation of 5.8S rRNA from tricistronic rRNA transcript (SSU-rRNA, 5.8S rRNA, LSU-rRNA)	22	12	1.65	1.4e-05	down	BP
GO:0051918	negative regulation of fibrinolysis	13	7	0.97	1.5e-05	down	BP
GO:0046598	positive regulation of viral entry into host cell	58	15	4.34	1.6e-05	down	BP
GO:0010951	negative regulation of endopeptidase activity	194	32	14.53	1.8e-05	down	BP
GO:0019835	cytolysis	30	12	2.25	2e-05	down	BP
GO:0006412	translation	686	140	51.37	2.4e-05	down	BP
GO:0034378	chylomicron assembly	10	6	0.75	2.8e-05	down	BP
GO:0001970	positive regulation of activation of membrane attack complex	4	4	0.3	3.1e-05	down	BP
GO:0051919	positive regulation of fibrinolysis	4	4	0.3	3.1e-05	down	BP
GO:0002542	Factor XII activation	4	4	0.3	3.1e-05	down	BP
GO:0032611	interleukin-1 beta production	91	19	6.81	3.5e-05	down	BP
GO:0002367	cytokine production involved in immune response	108	21	8.09	4.3e-05	down	BP
GO:0032897	negative regulation of viral transcription	72	16	5.39	6.6e-05	down	BP
GO:0051607	defense response to virus	164	27	12.28	8.3e-05	down	BP
GO:0000154	rRNA modification	35	13	2.62	0.00011	down	BP
GO:0042254	ribosome biogenesis	275	124	20.59	0.00012	down	BP
GO:0002474	antigen processing and presentation of peptide antigen via MHC class I	53	15	3.97	0.00013	down	BP
GO:1903901	negative regulation of viral life cycle	104	22	7.79	0.00017	down	BP
GO:0000469	cleavage involved in rRNA processing	27	12	2.02	0.00019	down	BP
GO:0000055	ribosomal large subunit export from nucleus	9	5	0.67	0.00023	down	BP
GO:0000447	endonucleolytic cleavage in ITS1 to separate SSU-rRNA from 5.8S rRNA and LSU-rRNA from tricistronic rRNA transcript (SSU-rRNA, 5.8S rRNA, LSU-rRNA)	9	5	0.67	0.00023	down	BP
GO:1902838	regulation of nuclear migration along microtubule	50	12	3.74	0.00025	down	BP
GO:0061931	positive regulation of erythrocyte enucleation	50	12	3.74	0.00025	down	BP
GO:0031639	plasminogen activation	37	10	2.77	0.00029	down	BP
GO:0050830	defense response to Gram-positive bacterium	66	14	4.94	0.00031	down	BP
GO:0019731	antibacterial humoral response	25	8	1.87	0.00033	down	BP
GO:2000427	positive regulation of apoptotic cell clearance	6	4	0.45	0.00041	down	BP
GO:2000259	positive regulation of protein activation cascade	6	4	0.45	0.00041	down	BP
GO:0090070	positive regulation of ribosome biogenesis	10	5	0.75	0.00043	down	BP
GO:2000234	positive regulation of rRNA processing	10	5	0.75	0.00043	down	BP
GO:2001034	positive regulation of double-strand break repair via nonhomologous end joining	10	5	0.75	0.00043	down	BP
GO:0090086	negative regulation of protein deubiquitination	53	12	3.97	0.00044	down	BP
GO:0002507	tolerance induction	26	8	1.95	0.00044	down	BP
GO:0006879	cellular iron ion homeostasis	69	14	5.17	0.0005	down	BP
GO:0010501	RNA secondary structure unwinding	47	11	3.52	0.00056	down	BP
GO:1903431	positive regulation of cell maturation	62	13	4.64	0.00057	down	BP
GO:1902187	negative regulation of viral release from host cell	62	13	4.64	0.00057	down	BP
GO:0030490	maturation of SSU-rRNA	52	26	3.89	0.00066	down	BP
GO:0006953	acute-phase response	63	13	4.72	0.00067	down	BP
GO:0051791	medium-chain fatty acid metabolic process	11	5	0.82	0.00073	down	BP
GO:1904667	negative regulation of ubiquitin protein ligase activity	11	5	0.82	0.00073	down	BP
GO:1902570	protein localization to nucleolus	11	5	0.82	0.00073	down	BP
GO:0060337	type I interferon signaling pathway	50	14	3.74	0.00075	down	BP
GO:2001198	regulation of dendritic cell differentiation	7	4	0.52	0.00091	down	BP
GO:0018298	protein-chromophore linkage	7	4	0.52	0.00091	down	BP
GO:0002675	positive regulation of acute inflammatory response	34	11	2.55	0.00098	down	BP
GO:0031167	rRNA methylation	23	7	1.72	0.00109	down	BP
GO:0030195	negative regulation of blood coagulation	61	20	4.57	0.00141	down	BP
GO:0006417	regulation of translation	412	48	30.85	0.00143	down	BP
GO:0034242	negative regulation of syncytium formation by plasma membrane fusion	4	3	0.3	0.00158	down	BP
GO:0006382	adenosine to inosine editing	4	3	0.3	0.00158	down	BP
GO:0034756	regulation of iron ion transport	4	3	0.3	0.00158	down	BP
GO:1904874	positive regulation of telomerase RNA localization to Cajal body	4	3	0.3	0.00158	down	BP
GO:0006414	translational elongation	131	20	9.81	0.00173	down	BP
GO:0045669	positive regulation of osteoblast differentiation	78	14	5.84	0.00177	down	BP
GO:0061844	antimicrobial humoral immune response mediated by antimicrobial peptide	46	10	3.44	0.0018	down	BP
GO:0075522	IRES-dependent viral translational initiation	13	5	0.97	0.0018	down	BP
GO:0006360	transcription by RNA polymerase I	71	13	5.32	0.00212	down	BP
GO:0032496	response to lipopolysaccharide	370	43	27.7	0.00259	down	BP
GO:0034374	low-density lipoprotein particle remodeling	14	5	1.05	0.00263	down	BP
GO:0071281	cellular response to iron ion	14	5	1.05	0.00263	down	BP
GO:0072378	blood coagulation, fibrin clot formation	39	21	2.92	0.00274	down	BP
GO:0090207	regulation of triglyceride metabolic process	50	13	3.74	0.00275	down	BP
GO:0006575	cellular modified amino acid metabolic process	195	26	14.6	0.00287	down	BP
GO:0001731	formation of translation preinitiation complex	9	4	0.67	0.0029	down	BP
GO:0010896	regulation of triglyceride catabolic process	9	4	0.67	0.0029	down	BP
GO:0042167	heme catabolic process	9	4	0.67	0.0029	down	BP
GO:0045778	positive regulation of ossification	109	17	8.16	0.00295	down	BP
GO:0042423	catecholamine biosynthetic process	21	6	1.57	0.00354	down	BP
GO:0090666	scaRNA localization to Cajal body	5	3	0.37	0.00373	down	BP
GO:0010430	fatty acid omega-oxidation	5	3	0.37	0.00373	down	BP
GO:0002248	connective tissue replacement involved in inflammatory response wound healing	5	3	0.37	0.00373	down	BP
GO:2000435	negative regulation of protein neddylation	5	3	0.37	0.00373	down	BP
GO:1904222	positive regulation of serine C-palmitoyltransferase activity	5	3	0.37	0.00373	down	BP
GO:1904211	membrane protein proteolysis involved in retrograde protein transport, ER to cytosol	5	3	0.37	0.00373	down	BP
GO:1904219	positive regulation of CDP-diacylglycerol-serine O-phosphatidyltransferase activity	5	3	0.37	0.00373	down	BP
GO:0060268	negative regulation of respiratory burst	5	3	0.37	0.00373	down	BP
GO:0001798	positive regulation of type IIa hypersensitivity	5	3	0.37	0.00373	down	BP
GO:0031648	protein destabilization	94	15	7.04	0.00407	down	BP
GO:0045648	positive regulation of erythrocyte differentiation	86	14	6.44	0.00451	down	BP
GO:0031126	sno(s)RNA 3'-end processing	10	4	0.75	0.00455	down	BP
GO:1904851	positive regulation of establishment of protein localization to telomere	10	4	0.75	0.00455	down	BP
GO:0060338	regulation of type I interferon-mediated signaling pathway	22	6	1.65	0.00457	down	BP
GO:0032088	negative regulation of NF-kappaB transcription factor activity	124	18	9.28	0.00497	down	BP
GO:0001522	pseudouridine synthesis	16	5	1.2	0.00507	down	BP
GO:0034379	very-low-density lipoprotein particle assembly	16	5	1.2	0.00507	down	BP
GO:0045087	innate immune response	720	104	53.91	0.00521	down	BP
GO:0007584	response to nutrient	374	42	28	0.00533	down	BP
GO:0051704	multi-organism process	2144	190	160.54	0.00535	down	BP
GO:0031638	zymogen activation	67	17	5.02	0.00549	down	BP
GO:0070206	protein trimerization	107	16	8.01	0.00588	down	BP
GO:0042274	ribosomal small subunit biogenesis	70	38	5.24	0.00645	down	BP
GO:0032479	regulation of type I interferon production	167	22	12.5	0.00669	down	BP
GO:0006642	triglyceride mobilization	11	4	0.82	0.00673	down	BP
GO:2000258	negative regulation of protein activation cascade	11	4	0.82	0.00673	down	BP
GO:0060765	regulation of androgen receptor signaling pathway	81	13	6.06	0.00687	down	BP
GO:0016556	mRNA modification	31	7	2.32	0.00691	down	BP
GO:0000054	ribosomal subunit export from nucleus	15	8	1.12	0.00696	down	BP
GO:0019626	short-chain fatty acid catabolic process	6	3	0.45	0.00705	down	BP
GO:0001869	negative regulation of complement activation, lectin pathway	6	3	0.45	0.00705	down	BP
GO:2000347	positive regulation of hepatocyte proliferation	6	3	0.45	0.00705	down	BP
GO:0007598	blood coagulation, extrinsic pathway	6	3	0.45	0.00705	down	BP
GO:0051031	tRNA transport	6	3	0.45	0.00705	down	BP
GO:0036265	RNA (guanine-N7)-methylation	6	3	0.45	0.00705	down	BP
GO:0019885	antigen processing and presentation of endogenous peptide antigen via MHC class I	6	3	0.45	0.00705	down	BP
GO:0034250	positive regulation of cellular amide metabolic process	158	21	11.83	0.00719	down	BP
GO:0071353	cellular response to interleukin-4	32	7	2.4	0.00829	down	BP
GO:0010955	negative regulation of protein processing	48	9	3.59	0.00842	down	BP
GO:0046597	negative regulation of viral entry into host cell	18	5	1.35	0.00877	down	BP
GO:0002438	acute inflammatory response to antigenic stimulus	30	9	2.25	0.00883	down	BP
GO:0032570	response to progesterone	93	14	6.96	0.00907	down	BP
GO:0000460	maturation of 5.8S rRNA	34	16	2.55	0.00916	down	BP
GO:0034392	negative regulation of smooth muscle cell apoptotic process	12	4	0.9	0.0095	down	BP
GO:1902947	regulation of tau-protein kinase activity	12	4	0.9	0.0095	down	BP
GO:0002637	regulation of immunoglobulin production	49	9	3.67	0.00964	down	BP
GO:0045071	negative regulation of viral genome replication	33	7	2.47	0.00986	down	BP
GO:0002791	regulation of peptide secretion	478	50	35.79	0.00989	down	BP
GO:0001819	positive regulation of cytokine production	378	41	28.3	0.0104	down	BP
GO:0016101	diterpenoid metabolic process	76	12	5.69	0.01045	down	BP
GO:0072376	protein activation cascade	82	42	6.14	0.01058	down	BP
GO:0002701	negative regulation of production of molecular mediator of immune response	26	6	1.95	0.0109	down	BP
GO:0060330	regulation of response to interferon-gamma	26	6	1.95	0.0109	down	BP
GO:0060334	regulation of interferon-gamma-mediated signaling pathway	26	6	1.95	0.0109	down	BP
GO:0010608	posttranscriptional regulation of gene expression	569	68	42.6	0.01114	down	BP
GO:0043603	cellular amide metabolic process	1119	182	83.79	0.01114	down	BP
GO:0035455	response to interferon-alpha	19	5	1.42	0.01118	down	BP
GO:0010523	negative regulation of calcium ion transport into cytosol	19	5	1.42	0.01118	down	BP
GO:0034162	toll-like receptor 9 signaling pathway	19	5	1.42	0.01118	down	BP
GO:0033033	negative regulation of myeloid cell apoptotic process	19	5	1.42	0.01118	down	BP
GO:0070475	rRNA base methylation	7	3	0.52	0.01165	down	BP
GO:0010037	response to carbon dioxide	7	3	0.52	0.01165	down	BP
GO:0000467	exonucleolytic trimming to generate mature 3'-end of 5.8S rRNA from tricistronic rRNA transcript (SSU-rRNA, 5.8S rRNA, LSU-rRNA)	7	3	0.52	0.01165	down	BP
GO:0000459	exonucleolytic trimming involved in rRNA processing	7	3	0.52	0.01165	down	BP
GO:0002638	negative regulation of immunoglobulin production	7	3	0.52	0.01165	down	BP
GO:0031118	rRNA pseudouridine synthesis	7	3	0.52	0.01165	down	BP
GO:0042268	regulation of cytolysis	7	3	0.52	0.01165	down	BP
GO:0046427	positive regulation of receptor signaling pathway via JAK-STAT	68	11	5.09	0.01167	down	BP
GO:0006721	terpenoid metabolic process	87	13	6.51	0.01239	down	BP
GO:2001056	positive regulation of cysteine-type endopeptidase activity	146	19	10.93	0.01268	down	BP
GO:0007259	receptor signaling pathway via JAK-STAT	136	18	10.18	0.01274	down	BP
GO:0033523	histone H2B ubiquitination	13	4	0.97	0.01292	down	BP
GO:1990440	positive regulation of transcription from RNA polymerase II promoter in response to endoplasmic reticulum stress	13	4	0.97	0.01292	down	BP
GO:0006720	isoprenoid metabolic process	107	15	8.01	0.01337	down	BP
GO:0097696	receptor signaling pathway via STAT	137	18	10.26	0.01368	down	BP
GO:0002793	positive regulation of peptide secretion	296	33	22.16	0.01385	down	BP
GO:0009074	aromatic amino acid family catabolic process	20	5	1.5	0.014	down	BP
GO:0032986	protein-DNA complex disassembly	20	5	1.5	0.014	down	BP
GO:0006400	tRNA modification	79	12	5.92	0.01406	down	BP
GO:1904894	positive regulation of receptor signaling pathway via STAT	70	11	5.24	0.01439	down	BP
GO:0010524	positive regulation of calcium ion transport into cytosol	61	10	4.57	0.01445	down	BP
GO:0032675	regulation of interleukin-6 production	118	16	8.84	0.01467	down	BP
GO:0010950	positive regulation of endopeptidase activity	169	21	12.65	0.01494	down	BP
GO:0001817	regulation of cytokine production	638	70	47.77	0.01496	down	BP
GO:0042255	ribosome assembly	60	38	4.49	0.0153	down	BP
GO:0006658	phosphatidylserine metabolic process	28	6	2.1	0.01571	down	BP
GO:0042730	fibrinolysis	30	14	2.25	0.01653	down	BP
GO:0070230	positive regulation of lymphocyte apoptotic process	14	4	1.05	0.01704	down	BP
GO:1900102	negative regulation of endoplasmic reticulum unfolded protein response	14	4	1.05	0.01704	down	BP
GO:0050765	negative regulation of phagocytosis	21	5	1.57	0.01727	down	BP
GO:0042104	positive regulation of activated T cell proliferation	21	5	1.57	0.01727	down	BP
GO:0000056	ribosomal small subunit export from nucleus	8	3	0.6	0.01761	down	BP
GO:0046146	tetrahydrobiopterin metabolic process	8	3	0.6	0.01761	down	BP
GO:0000492	box C/D snoRNP assembly	8	3	0.6	0.01761	down	BP
GO:1900272	negative regulation of long-term synaptic potentiation	8	3	0.6	0.01761	down	BP
GO:1903911	positive regulation of receptor clustering	8	3	0.6	0.01761	down	BP
GO:0010898	positive regulation of triglyceride catabolic process	8	3	0.6	0.01761	down	BP
GO:0043634	polyadenylation-dependent ncRNA catabolic process	8	3	0.6	0.01761	down	BP
GO:0060340	positive regulation of type I interferon-mediated signaling pathway	8	3	0.6	0.01761	down	BP
GO:0010936	negative regulation of macrophage cytokine production	8	3	0.6	0.01761	down	BP
GO:0090209	negative regulation of triglyceride metabolic process	8	3	0.6	0.01761	down	BP
GO:0010712	regulation of collagen metabolic process	54	9	4.04	0.01789	down	BP
GO:1901361	organic cyclic compound catabolic process	676	120	50.62	0.01797	down	BP
GO:0010575	positive regulation of vascular endothelial growth factor production	29	6	2.17	0.01858	down	BP
GO:0006805	xenobiotic metabolic process	92	13	6.89	0.01919	down	BP
GO:0032635	interleukin-6 production	122	16	9.13	0.01966	down	BP
GO:0110148	biomineralization	133	17	9.96	0.02084	down	BP
GO:0043280	positive regulation of cysteine-type endopeptidase activity involved in apoptotic process	133	17	9.96	0.02084	down	BP
GO:0031214	biomineral tissue development	133	17	9.96	0.02084	down	BP
GO:0090303	positive regulation of wound healing	60	15	4.49	0.02142	down	BP
GO:0032435	negative regulation of proteasomal ubiquitin-dependent protein catabolic process	30	6	2.25	0.0218	down	BP
GO:0009072	aromatic amino acid family metabolic process	30	6	2.25	0.0218	down	BP
GO:0008152	metabolic process	9823	833	735.51	0.02181	down	BP
GO:0002251	organ or tissue specific immune response	15	4	1.12	0.02189	down	BP
GO:0071393	cellular response to progesterone stimulus	15	4	1.12	0.02189	down	BP
GO:0060674	placenta blood vessel development	47	8	3.52	0.02214	down	BP
GO:0015833	peptide transport	1947	178	145.78	0.02275	down	BP
GO:0050708	regulation of protein secretion	456	46	34.14	0.02328	down	BP
GO:0010559	regulation of glycoprotein biosynthetic process	39	7	2.92	0.02406	down	BP
GO:0008033	tRNA processing	115	15	8.61	0.02445	down	BP
GO:0030282	bone mineralization	105	14	7.86	0.02456	down	BP
GO:0042509	regulation of tyrosine phosphorylation of STAT protein	57	9	4.27	0.02481	down	BP
GO:1901628	positive regulation of postsynaptic membrane organization	9	3	0.67	0.02497	down	BP
GO:0002227	innate immune response in mucosa	9	3	0.67	0.02497	down	BP
GO:0009396	folic acid-containing compound biosynthetic process	9	3	0.67	0.02497	down	BP
GO:0043633	polyadenylation-dependent RNA catabolic process	9	3	0.67	0.02497	down	BP
GO:0097064	ncRNA export from nucleus	9	3	0.67	0.02497	down	BP
GO:0002726	positive regulation of T cell cytokine production	23	5	1.72	0.02524	down	BP
GO:0046006	regulation of activated T cell proliferation	31	6	2.32	0.02537	down	BP
GO:0022617	extracellular matrix disassembly	76	11	5.69	0.02539	down	BP
GO:0006513	protein monoubiquitination	126	16	9.43	0.02584	down	BP
GO:0042886	amide transport	1968	179	147.36	0.02663	down	BP
GO:0031100	animal organ regeneration	159	34	11.91	0.02726	down	BP
GO:0042976	activation of Janus kinase activity	16	4	1.2	0.02749	down	BP
GO:0032717	negative regulation of interleukin-8 production	16	4	1.2	0.02749	down	BP
GO:0045591	positive regulation of regulatory T cell differentiation	16	4	1.2	0.02749	down	BP
GO:0045727	positive regulation of translation	127	16	9.51	0.02759	down	BP
GO:0071704	organic substance metabolic process	9428	812	705.94	0.02761	down	BP
GO:0051091	positive regulation of DNA-binding transcription factor activity	301	32	22.54	0.02794	down	BP
GO:0046425	regulation of receptor signaling pathway via JAK-STAT	117	15	8.76	0.02807	down	BP
GO:0006401	RNA catabolic process	329	87	24.63	0.02817	down	BP
GO:0006402	mRNA catabolic process	295	84	22.09	0.02873	down	BP
GO:1903319	positive regulation of protein maturation	36	10	2.7	0.02884	down	BP
GO:2001235	positive regulation of apoptotic signaling pathway	246	27	18.42	0.02894	down	BP
GO:0001523	retinoid metabolic process	68	10	5.09	0.02917	down	BP
GO:0060716	labyrinthine layer blood vessel development	32	6	2.4	0.02931	down	BP
GO:0030488	tRNA methylation	32	6	2.4	0.02931	down	BP
GO:0045943	positive regulation of transcription by RNA polymerase I	24	5	1.8	0.02997	down	BP
GO:0006797	polyphosphate metabolic process	4	2	0.3	0.03035	down	BP
GO:1904627	response to phorbol 13-acetate 12-myristate	4	2	0.3	0.03035	down	BP
GO:1904628	cellular response to phorbol 13-acetate 12-myristate	4	2	0.3	0.03035	down	BP
GO:0097252	oligodendrocyte apoptotic process	4	2	0.3	0.03035	down	BP
GO:2001199	negative regulation of dendritic cell differentiation	4	2	0.3	0.03035	down	BP
GO:0035711	T-helper 1 cell activation	4	2	0.3	0.03035	down	BP
GO:0070120	ciliary neurotrophic factor-mediated signaling pathway	4	2	0.3	0.03035	down	BP
GO:0015746	citrate transport	4	2	0.3	0.03035	down	BP
GO:0072717	cellular response to actinomycin D	4	2	0.3	0.03035	down	BP
GO:0070682	proteasome regulatory particle assembly	4	2	0.3	0.03035	down	BP
GO:0007406	negative regulation of neuroblast proliferation	4	2	0.3	0.03035	down	BP
GO:1902732	positive regulation of chondrocyte proliferation	4	2	0.3	0.03035	down	BP
GO:0048254	snoRNA localization	4	2	0.3	0.03035	down	BP
GO:0010760	negative regulation of macrophage chemotaxis	4	2	0.3	0.03035	down	BP
GO:1904395	positive regulation of skeletal muscle acetylcholine-gated channel clustering	4	2	0.3	0.03035	down	BP
GO:0071431	tRNA-containing ribonucleoprotein complex export from nucleus	4	2	0.3	0.03035	down	BP
GO:0019441	tryptophan catabolic process to kynurenine	4	2	0.3	0.03035	down	BP
GO:2000563	positive regulation of CD4-positive, alpha-beta T cell proliferation	4	2	0.3	0.03035	down	BP
GO:0006409	tRNA export from nucleus	4	2	0.3	0.03035	down	BP
GO:0031860	telomeric 3' overhang formation	4	2	0.3	0.03035	down	BP
GO:0110151	positive regulation of biomineralization	41	7	3.07	0.03091	down	BP
GO:0070169	positive regulation of biomineral tissue development	41	7	3.07	0.03091	down	BP
GO:0002252	immune effector process	1021	117	76.45	0.03094	down	BP
GO:0006399	tRNA metabolic process	182	21	13.63	0.03131	down	BP
GO:0007004	telomere maintenance via telomerase	69	10	5.17	0.03191	down	BP
GO:1904892	regulation of receptor signaling pathway via STAT	119	15	8.91	0.03207	down	BP
GO:0050714	positive regulation of protein secretion	282	30	21.12	0.03225	down	BP
GO:0007260	tyrosine phosphorylation of STAT protein	60	9	4.49	0.03344	down	BP
GO:0045745	positive regulation of G protein-coupled receptor signaling pathway	33	6	2.47	0.03363	down	BP
GO:0006363	termination of RNA polymerase I transcription	33	6	2.47	0.03363	down	BP
GO:0051818	disruption of cells of other organism involved in symbiotic interaction	10	3	0.75	0.03373	down	BP
GO:0006569	tryptophan catabolic process	10	3	0.75	0.03373	down	BP
GO:0035739	CD4-positive, alpha-beta T cell proliferation	10	3	0.75	0.03373	down	BP
GO:0046218	indolalkylamine catabolic process	10	3	0.75	0.03373	down	BP
GO:0000491	small nucleolar ribonucleoprotein complex assembly	10	3	0.75	0.03373	down	BP
GO:2000561	regulation of CD4-positive, alpha-beta T cell proliferation	10	3	0.75	0.03373	down	BP
GO:1990402	embryonic liver development	10	3	0.75	0.03373	down	BP
GO:0042436	indole-containing compound catabolic process	10	3	0.75	0.03373	down	BP
GO:0060760	positive regulation of response to cytokine stimulus	51	8	3.82	0.03452	down	BP
GO:0032732	positive regulation of interleukin-1 production	51	8	3.82	0.03452	down	BP
GO:0006278	RNA-dependent DNA biosynthetic process	70	10	5.24	0.03483	down	BP
GO:0007339	binding of sperm to zona pellucida	25	5	1.87	0.03523	down	BP
GO:0050832	defense response to fungus	25	5	1.87	0.03523	down	BP
GO:0006446	regulation of translational initiation	80	11	5.99	0.03551	down	BP
GO:1903036	positive regulation of response to wounding	74	16	5.54	0.03551	down	BP
GO:1901796	regulation of signal transduction by p53 class mediator	142	17	10.63	0.03648	down	BP
GO:0006611	protein export from nucleus	196	22	14.68	0.03667	down	BP
GO:0044364	disruption of cells of other organism	34	6	2.55	0.03835	down	BP
GO:0010574	regulation of vascular endothelial growth factor production	34	6	2.55	0.03835	down	BP
GO:0006356	regulation of transcription by RNA polymerase I	34	6	2.55	0.03835	down	BP
GO:0002702	positive regulation of production of molecular mediator of immune response	91	12	6.81	0.0384	down	BP
GO:0001816	cytokine production	727	88	54.44	0.03856	down	BP
GO:0071466	cellular response to xenobiotic stimulus	231	25	17.3	0.03991	down	BP
GO:0019439	aromatic compound catabolic process	641	115	48	0.03999	down	BP
GO:0048260	positive regulation of receptor-mediated endocytosis	62	9	4.64	0.04023	down	BP
GO:0045471	response to ethanol	209	23	15.65	0.0403	down	BP
GO:0046134	pyrimidine nucleoside biosynthetic process	26	5	1.95	0.04102	down	BP
GO:0034356	NAD biosynthesis via nicotinamide riboside salvage pathway	26	5	1.95	0.04102	down	BP
GO:0072528	pyrimidine-containing compound biosynthetic process	53	8	3.97	0.04219	down	BP
GO:0051865	protein autoubiquitination	113	14	8.46	0.04249	down	BP
GO:0002819	regulation of adaptive immune response	161	21	12.06	0.04285	down	BP
GO:0006613	cotranslational protein targeting to membrane	76	61	5.69	0.04334	down	BP
GO:0010573	vascular endothelial growth factor production	35	6	2.62	0.04346	down	BP
GO:1901031	regulation of response to reactive oxygen species	44	7	3.29	0.04347	down	BP
GO:0009581	detection of external stimulus	103	13	7.71	0.04352	down	BP
GO:0031125	rRNA 3'-end processing	13	5	0.97	0.04364	down	BP
GO:0042098	T cell proliferation	180	22	13.48	0.04364	down	BP
GO:0072075	metanephric mesenchyme development	11	3	0.82	0.04385	down	BP
GO:0051901	positive regulation of mitochondrial depolarization	11	3	0.82	0.04385	down	BP
GO:0061684	chaperone-mediated autophagy	11	3	0.82	0.04385	down	BP
GO:0046951	ketone body biosynthetic process	11	3	0.82	0.04385	down	BP
GO:0051349	positive regulation of lyase activity	11	3	0.82	0.04385	down	BP
GO:0016126	sterol biosynthetic process	83	11	6.21	0.04475	down	BP
GO:0009582	detection of abiotic stimulus	104	13	7.79	0.04648	down	BP
GO:0001829	trophectodermal cell differentiation	27	5	2.02	0.04736	down	BP
GO:0035036	sperm-egg recognition	27	5	2.02	0.04736	down	BP
GO:0006405	RNA export from nucleus	136	16	10.18	0.04752	down	BP
GO:0000479	endonucleolytic cleavage of tricistronic rRNA transcript (SSU-rRNA, 5.8S rRNA, LSU-rRNA)	14	7	1.05	0.04771	down	BP
GO:0031585	regulation of inositol 1,4,5-trisphosphate-sensitive calcium-release channel activity	5	2	0.37	0.0481	down	BP
GO:0019640	glucuronate catabolic process to xylulose 5-phosphate	5	2	0.37	0.0481	down	BP
GO:0060745	mammary gland branching involved in pregnancy	5	2	0.37	0.0481	down	BP
GO:0006842	tricarboxylic acid transport	5	2	0.37	0.0481	down	BP
GO:0060526	prostate glandular acinus morphogenesis	5	2	0.37	0.0481	down	BP
GO:0060527	prostate epithelial cord arborization involved in prostate glandular acinus morphogenesis	5	2	0.37	0.0481	down	BP
GO:0006543	glutamine catabolic process	5	2	0.37	0.0481	down	BP
GO:2001200	positive regulation of dendritic cell differentiation	5	2	0.37	0.0481	down	BP
GO:1903406	regulation of P-type sodium:potassium-exchanging transporter activity	5	2	0.37	0.0481	down	BP
GO:1900368	regulation of RNA interference	5	2	0.37	0.0481	down	BP
GO:0072344	rescue of stalled ribosome	5	2	0.37	0.0481	down	BP
GO:0035674	tricarboxylic acid transmembrane transport	5	2	0.37	0.0481	down	BP
GO:1905522	negative regulation of macrophage migration	5	2	0.37	0.0481	down	BP
GO:0002475	antigen processing and presentation via MHC class Ib	5	2	0.37	0.0481	down	BP
GO:0071043	CUT metabolic process	5	2	0.37	0.0481	down	BP
GO:0071034	CUT catabolic process	5	2	0.37	0.0481	down	BP
GO:0040031	snRNA modification	5	2	0.37	0.0481	down	BP
GO:0002513	tolerance induction to self antigen	5	2	0.37	0.0481	down	BP
GO:0060012	synaptic transmission, glycinergic	5	2	0.37	0.0481	down	BP
GO:0006064	glucuronate catabolic process	5	2	0.37	0.0481	down	BP
GO:1904393	regulation of skeletal muscle acetylcholine-gated channel clustering	5	2	0.37	0.0481	down	BP
GO:0034163	regulation of toll-like receptor 9 signaling pathway	5	2	0.37	0.0481	down	BP
GO:0034165	positive regulation of toll-like receptor 9 signaling pathway	5	2	0.37	0.0481	down	BP
GO:0034154	toll-like receptor 7 signaling pathway	5	2	0.37	0.0481	down	BP
GO:1904426	positive regulation of GTP binding	5	2	0.37	0.0481	down	BP
GO:1990481	mRNA pseudouridine synthesis	5	2	0.37	0.0481	down	BP
GO:0071283	cellular response to iron(III) ion	5	2	0.37	0.0481	down	BP
GO:2000622	regulation of nuclear-transcribed mRNA catabolic process, nonsense-mediated decay	5	2	0.37	0.0481	down	BP
GO:2000623	negative regulation of nuclear-transcribed mRNA catabolic process, nonsense-mediated decay	5	2	0.37	0.0481	down	BP
GO:0042414	epinephrine metabolic process	5	2	0.37	0.0481	down	BP
GO:0031284	positive regulation of guanylate cyclase activity	5	2	0.37	0.0481	down	BP
GO:1901159	xylulose 5-phosphate biosynthetic process	5	2	0.37	0.0481	down	BP
GO:0051343	positive regulation of cyclic-nucleotide phosphodiesterase activity	5	2	0.37	0.0481	down	BP
GO:1904714	regulation of chaperone-mediated autophagy	5	2	0.37	0.0481	down	BP
GO:0051167	xylulose 5-phosphate metabolic process	5	2	0.37	0.0481	down	BP
GO:0051124	synaptic assembly at neuromuscular junction	5	2	0.37	0.0481	down	BP
GO:0045919	positive regulation of cytolysis	5	2	0.37	0.0481	down	BP
GO:0042531	positive regulation of tyrosine phosphorylation of STAT protein	45	7	3.37	0.04829	down	BP
GO:0001961	positive regulation of cytokine-mediated signaling pathway	45	7	3.37	0.04829	down	BP
GO:0009303	rRNA transcription	45	7	3.37	0.04829	down	BP
GO:0046461	neutral lipid catabolic process	45	10	3.37	0.04832	down	BP
GO:0046464	acylglycerol catabolic process	45	10	3.37	0.04832	down	BP
GO:0090322	regulation of superoxide metabolic process	36	6	2.7	0.04899	down	BP
GO:0033032	regulation of myeloid cell apoptotic process	36	6	2.7	0.04899	down	BP
GO:0000098	sulfur amino acid catabolic process	19	4	1.42	0.04902	down	BP
GO:0032429	regulation of phospholipase A2 activity	19	4	1.42	0.04902	down	BP
GO:0015732	prostaglandin transport	19	4	1.42	0.04902	down	BP
GO:0035338	long-chain fatty-acyl-CoA biosynthetic process	16	11	1.45	9.5e-09	up	BP
GO:0000281	mitotic cytokinesis	67	23	6.09	9.5e-09	up	BP
GO:0034501	protein localization to kinetochore	19	11	1.73	1.3e-07	up	BP
GO:0051977	lysophospholipid transport	8	7	0.73	3.7e-07	up	BP
GO:0051256	mitotic spindle midzone assembly	11	8	1	5.8e-07	up	BP
GO:0006101	citrate metabolic process	45	16	4.09	9.9e-07	up	BP
GO:0045540	regulation of cholesterol biosynthetic process	52	17	4.72	1.8e-06	up	BP
GO:0006099	tricarboxylic acid cycle	39	14	3.54	4.1e-06	up	BP
GO:0046949	fatty-acyl-CoA biosynthetic process	28	18	2.54	2.5e-05	up	BP
GO:0090307	mitotic spindle assembly	70	24	6.36	4.6e-05	up	BP
GO:0031145	anaphase-promoting complex-dependent catabolic process	36	12	3.27	4.7e-05	up	BP
GO:0019433	triglyceride catabolic process	36	12	3.27	4.7e-05	up	BP
GO:0002931	response to ischemia	60	16	5.45	6.2e-05	up	BP
GO:0031116	positive regulation of microtubule polymerization	37	12	3.36	6.4e-05	up	BP
GO:0031577	spindle checkpoint signaling	39	14	3.54	6.6e-05	up	BP
GO:0019367	fatty acid elongation, saturated fatty acid	4	4	0.36	6.8e-05	up	BP
GO:0034625	fatty acid elongation, monounsaturated fatty acid	4	4	0.36	6.8e-05	up	BP
GO:0034626	fatty acid elongation, polyunsaturated fatty acid	4	4	0.36	6.8e-05	up	BP
GO:0009168	purine ribonucleoside monophosphate biosynthetic process	129	26	11.72	8.2e-05	up	BP
GO:0042761	very long-chain fatty acid biosynthetic process	10	6	0.91	8.5e-05	up	BP
GO:0008608	attachment of spindle microtubules to kinetochore	34	11	3.09	0.00013	up	BP
GO:0042776	mitochondrial ATP synthesis coupled proton transport	19	8	1.73	0.00014	up	BP
GO:0006695	cholesterol biosynthetic process	78	28	7.09	0.00014	up	BP
GO:0051642	centrosome localization	40	12	3.63	0.00015	up	BP
GO:0048919	posterior lateral line neuromast development	11	6	1	0.00017	up	BP
GO:0051017	actin filament bundle assembly	173	31	15.72	0.00018	up	BP
GO:0042632	cholesterol homeostasis	72	17	6.54	0.00019	up	BP
GO:0051383	kinetochore organization	20	8	1.82	0.00021	up	BP
GO:0032000	positive regulation of fatty acid beta-oxidation	16	7	1.45	0.00027	up	BP
GO:0034383	low-density lipoprotein particle clearance	39	13	3.54	0.0003	up	BP
GO:0045840	positive regulation of mitotic nuclear division	56	14	5.09	0.00037	up	BP
GO:0031581	hemidesmosome assembly	17	7	1.54	0.00043	up	BP
GO:0046487	glyoxylate metabolic process	13	6	1.18	0.00054	up	BP
GO:1901029	negative regulation of mitochondrial outer membrane permeabilization involved in apoptotic signaling pathway	13	6	1.18	0.00054	up	BP
GO:0000022	mitotic spindle elongation	14	11	1.27	0.00073	up	BP
GO:0010986	positive regulation of lipoprotein particle clearance	5	5	0.45	0.00074	up	BP
GO:0007094	mitotic spindle assembly checkpoint signaling	35	10	3.18	0.00082	up	BP
GO:0046496	nicotinamide nucleotide metabolic process	156	30	14.17	0.00084	up	BP
GO:0071456	cellular response to hypoxia	189	31	17.17	0.00087	up	BP
GO:0045329	carnitine biosynthetic process	6	4	0.55	0.00087	up	BP
GO:0007077	mitotic nuclear membrane disassembly	14	6	1.27	0.00088	up	BP
GO:0031579	membrane raft organization	25	8	2.27	0.0012	up	BP
GO:0050892	intestinal absorption	49	17	4.45	0.00126	up	BP
GO:0006103	2-oxoglutarate metabolic process	31	9	2.82	0.00131	up	BP
GO:0019432	triglyceride biosynthetic process	44	11	4	0.00153	up	BP
GO:0009117	nucleotide metabolic process	735	135	66.77	0.00167	up	BP
GO:0030199	collagen fibril organization	51	12	4.63	0.00168	up	BP
GO:0015909	long-chain fatty acid transport	79	16	7.18	0.00173	up	BP
GO:0007010	cytoskeleton organization	1339	193	121.63	0.00173	up	BP
GO:0051494	negative regulation of cytoskeleton organization	158	32	14.35	0.00177	up	BP
GO:0051639	actin filament network formation	11	5	1	0.00178	up	BP
GO:1905820	positive regulation of chromosome separation	11	5	1	0.00178	up	BP
GO:0090084	negative regulation of inclusion body assembly	11	5	1	0.00178	up	BP
GO:0006754	ATP biosynthetic process	159	36	14.44	0.00183	up	BP
GO:0007096	regulation of exit from mitosis	21	7	1.91	0.00186	up	BP
GO:0033273	response to vitamin	165	27	14.99	0.00188	up	BP
GO:0016321	female meiosis chromosome segregation	7	4	0.64	0.00189	up	BP
GO:0006741	NADP biosynthetic process	7	4	0.64	0.00189	up	BP
GO:0001505	regulation of neurotransmitter levels	337	47	30.61	0.00197	up	BP
GO:0097201	negative regulation of transcription from RNA polymerase II promoter in response to stress	16	6	1.45	0.002	up	BP
GO:0030953	astral microtubule organization	16	6	1.45	0.002	up	BP
GO:0006107	oxaloacetate metabolic process	16	6	1.45	0.002	up	BP
GO:0030198	extracellular matrix organization	346	54	31.43	0.00201	up	BP
GO:0016999	antibiotic metabolic process	134	23	12.17	0.00211	up	BP
GO:0007020	microtubule nucleation	33	9	3	0.00212	up	BP
GO:0098901	regulation of cardiac muscle cell action potential	33	9	3	0.00212	up	BP
GO:1902904	negative regulation of supramolecular fiber organization	152	31	13.81	0.00215	up	BP
GO:0006986	response to unfolded protein	179	32	16.26	0.00218	up	BP
GO:0043154	negative regulation of cysteine-type endopeptidase activity involved in apoptotic process	104	19	9.45	0.0024	up	BP
GO:0006631	fatty acid metabolic process	371	60	33.7	0.00265	up	BP
GO:0046889	positive regulation of lipid biosynthetic process	90	17	8.18	0.00276	up	BP
GO:0033490	cholesterol biosynthetic process via lathosterol	4	3	0.36	0.00279	up	BP
GO:0033489	cholesterol biosynthetic process via desmosterol	4	3	0.36	0.00279	up	BP
GO:1990705	cholangiocyte proliferation	4	3	0.36	0.00279	up	BP
GO:0071506	cellular response to mycophenolic acid	4	3	0.36	0.00279	up	BP
GO:2000813	negative regulation of barbed-end actin filament capping	4	3	0.36	0.00279	up	BP
GO:0032470	positive regulation of endoplasmic reticulum calcium ion concentration	4	3	0.36	0.00279	up	BP
GO:0010899	regulation of phosphatidylcholine catabolic process	4	3	0.36	0.00279	up	BP
GO:1905600	regulation of receptor-mediated endocytosis involved in cholesterol transport	4	3	0.36	0.00279	up	BP
GO:0042026	protein refolding	17	6	1.54	0.00285	up	BP
GO:0032374	regulation of cholesterol transport	41	10	3.72	0.00302	up	BP
GO:0046677	response to antibiotic	463	60	42.06	0.00303	up	BP
GO:0071873	response to norepinephrine	8	4	0.73	0.00352	up	BP
GO:1902949	positive regulation of tau-protein kinase activity	8	4	0.73	0.00352	up	BP
GO:0061732	mitochondrial acetyl-CoA biosynthetic process from pyruvate	8	4	0.73	0.00352	up	BP
GO:0017185	peptidyl-lysine hydroxylation	8	4	0.73	0.00352	up	BP
GO:0006055	CMP-N-acetylneuraminate biosynthetic process	8	4	0.73	0.00352	up	BP
GO:0032803	regulation of low-density lipoprotein particle receptor catabolic process	8	4	0.73	0.00352	up	BP
GO:0006108	malate metabolic process	8	4	0.73	0.00352	up	BP
GO:0006887	exocytosis	838	99	76.12	0.00355	up	BP
GO:0032781	positive regulation of ATPase activity	63	13	5.72	0.00382	up	BP
GO:0007076	mitotic chromosome condensation	18	6	1.64	0.00396	up	BP
GO:0032703	negative regulation of interleukin-2 production	18	6	1.64	0.00396	up	BP
GO:0032467	positive regulation of cytokinesis	36	9	3.27	0.00404	up	BP
GO:0006577	amino-acid betaine metabolic process	19	9	1.73	0.00419	up	BP
GO:0009167	purine ribonucleoside monophosphate metabolic process	272	49	24.71	0.00421	up	BP
GO:0006123	mitochondrial electron transport, cytochrome c to oxygen	13	5	1.18	0.00424	up	BP
GO:0051764	actin crosslink formation	13	5	1.18	0.00424	up	BP
GO:0086004	regulation of cardiac muscle cell contraction	43	10	3.91	0.00438	up	BP
GO:1903580	positive regulation of ATP metabolic process	43	10	3.91	0.00438	up	BP
GO:0072330	monocarboxylic acid biosynthetic process	246	40	22.35	0.00438	up	BP
GO:0035637	multicellular organismal signaling	151	24	13.72	0.00478	up	BP
GO:0000086	G2/M transition of mitotic cell cycle	242	43	21.98	0.00482	up	BP
GO:0015718	monocarboxylic acid transport	161	30	14.63	0.00505	up	BP
GO:0051310	metaphase plate congression	51	11	4.63	0.0053	up	BP
GO:0035313	wound healing, spreading of epidermal cells	19	6	1.73	0.00534	up	BP
GO:0018149	peptide cross-linking	31	8	2.82	0.00536	up	BP
GO:0048870	cell motility	1524	170	138.44	0.00537	up	BP
GO:0009166	nucleotide catabolic process	178	27	16.17	0.00554	up	BP
GO:0051301	cell division	638	96	57.96	0.00559	up	BP
GO:0010971	positive regulation of G2/M transition of mitotic cell cycle	25	7	2.27	0.00559	up	BP
GO:1901880	negative regulation of protein depolymerization	70	16	6.36	0.00568	up	BP
GO:0043987	histone H3-S10 phosphorylation	9	4	0.82	0.00588	up	BP
GO:0070508	cholesterol import	9	4	0.82	0.00588	up	BP
GO:0042426	choline catabolic process	9	4	0.82	0.00588	up	BP
GO:0030174	regulation of DNA-dependent DNA replication initiation	9	4	0.82	0.00588	up	BP
GO:0006942	regulation of striated muscle contraction	95	21	8.63	0.00595	up	BP
GO:0030834	regulation of actin filament depolymerization	56	14	5.09	0.00608	up	BP
GO:0007028	cytoplasm organization	14	5	1.27	0.00611	up	BP
GO:0036089	cleavage furrow formation	14	5	1.27	0.00611	up	BP
GO:0010885	regulation of cholesterol storage	14	5	1.27	0.00611	up	BP
GO:0098657	import into cell	650	78	59.05	0.00624	up	BP
GO:0007160	cell-matrix adhesion	223	32	20.26	0.00631	up	BP
GO:0006562	proline catabolic process	5	3	0.45	0.0065	up	BP
GO:0002155	regulation of thyroid hormone mediated signaling pathway	5	3	0.45	0.0065	up	BP
GO:0016332	establishment or maintenance of polarity of embryonic epithelium	5	3	0.45	0.0065	up	BP
GO:0043988	histone H3-S28 phosphorylation	5	3	0.45	0.0065	up	BP
GO:1904146	positive regulation of meiotic cell cycle process involved in oocyte maturation	5	3	0.45	0.0065	up	BP
GO:0019470	4-hydroxyproline catabolic process	5	3	0.45	0.0065	up	BP
GO:0036146	cellular response to mycotoxin	5	3	0.45	0.0065	up	BP
GO:1905446	regulation of mitochondrial ATP synthesis coupled electron transport	5	3	0.45	0.0065	up	BP
GO:0000915	actomyosin contractile ring assembly	5	3	0.45	0.0065	up	BP
GO:0008050	female courtship behavior	5	3	0.45	0.0065	up	BP
GO:0032532	regulation of microvillus length	5	3	0.45	0.0065	up	BP
GO:0050916	sensory perception of sweet taste	5	3	0.45	0.0065	up	BP
GO:0035279	mRNA cleavage involved in gene silencing by miRNA	5	3	0.45	0.0065	up	BP
GO:0042407	cristae formation	32	8	2.91	0.00659	up	BP
GO:2001169	regulation of ATP biosynthetic process	67	13	6.09	0.00659	up	BP
GO:0009124	nucleoside monophosphate biosynthetic process	149	32	13.54	0.00665	up	BP
GO:0008203	cholesterol metabolic process	162	43	14.72	0.00695	up	BP
GO:0051262	protein tetramerization	164	25	14.9	0.00696	up	BP
GO:0032465	regulation of cytokinesis	82	19	7.45	0.00702	up	BP
GO:0030033	microvillus assembly	26	7	2.36	0.00705	up	BP
GO:0009070	serine family amino acid biosynthetic process	20	6	1.82	0.00706	up	BP
GO:0036499	PERK-mediated unfolded protein response	20	6	1.82	0.00706	up	BP
GO:0060048	cardiac muscle contraction	134	26	12.17	0.0071	up	BP
GO:1900026	positive regulation of substrate adhesion-dependent cell spreading	46	10	4.18	0.00726	up	BP
GO:0006749	glutathione metabolic process	46	10	4.18	0.00726	up	BP
GO:0030855	epithelial cell differentiation	664	79	60.32	0.00734	up	BP
GO:0045732	positive regulation of protein catabolic process	252	35	22.89	0.0074	up	BP
GO:0002027	regulation of heart rate	91	16	8.27	0.00745	up	BP
GO:0032370	positive regulation of lipid transport	68	13	6.18	0.00749	up	BP
GO:0042060	wound healing	590	75	53.6	0.00771	up	BP
GO:0010389	regulation of G2/M transition of mitotic cell cycle	191	32	17.35	0.00772	up	BP
GO:0045471	response to ethanol	209	30	18.99	0.00797	up	BP
GO:0061621	canonical glycolysis	33	8	3	0.00802	up	BP
GO:0006163	purine nucleotide metabolic process	574	108	52.14	0.00818	up	BP
GO:2001243	negative regulation of intrinsic apoptotic signaling pathway	100	17	9.08	0.00833	up	BP
GO:0040001	establishment of mitotic spindle localization	40	9	3.63	0.00844	up	BP
GO:0007163	establishment or maintenance of cell polarity	233	35	21.17	0.00846	up	BP
GO:0050873	brown fat cell differentiation	47	10	4.27	0.00848	up	BP
GO:0032306	regulation of prostaglandin secretion	15	5	1.36	0.00849	up	BP
GO:0030299	intestinal cholesterol absorption	15	5	1.36	0.00849	up	BP
GO:1902101	positive regulation of metaphase/anaphase transition of cell cycle	10	4	0.91	0.0091	up	BP
GO:1905461	positive regulation of vascular associated smooth muscle cell apoptotic process	10	4	0.91	0.0091	up	BP
GO:0031115	negative regulation of microtubule polymerization	21	6	1.91	0.00913	up	BP
GO:0033622	integrin activation	21	6	1.91	0.00913	up	BP
GO:0055119	relaxation of cardiac muscle	21	6	1.91	0.00913	up	BP
GO:0097366	response to bronchodilator	70	13	6.36	0.00958	up	BP
GO:1902235	regulation of endoplasmic reticulum stress-induced intrinsic apoptotic signaling pathway	34	8	3.09	0.00967	up	BP
GO:0045940	positive regulation of steroid metabolic process	34	8	3.09	0.00967	up	BP
GO:0006694	steroid biosynthetic process	198	47	17.99	0.00978	up	BP
GO:1900544	positive regulation of purine nucleotide metabolic process	48	10	4.36	0.00987	up	BP
GO:0090224	regulation of spindle organization	41	9	3.72	0.00996	up	BP
GO:0031532	actin cytoskeleton reorganization	102	17	9.27	0.01012	up	BP
GO:1902017	regulation of cilium assembly	63	12	5.72	0.01028	up	BP
GO:0006084	acetyl-CoA metabolic process	38	13	3.45	0.01058	up	BP
GO:0006641	triglyceride metabolic process	125	30	11.35	0.0106	up	BP
GO:0045055	regulated exocytosis	714	83	64.86	0.01083	up	BP
GO:0002934	desmosome organization	16	5	1.45	0.01144	up	BP
GO:0010867	positive regulation of triglyceride biosynthetic process	16	5	1.45	0.01144	up	BP
GO:0051382	kinetochore assembly	16	5	1.45	0.01144	up	BP
GO:0009226	nucleotide-sugar biosynthetic process	30	10	2.73	0.01146	up	BP
GO:0032509	endosome transport via multivesicular body sorting pathway	22	6	2	0.01161	up	BP
GO:0034698	response to gonadotropin	64	12	5.81	0.01164	up	BP
GO:0010032	meiotic chromosome condensation	6	3	0.55	0.01212	up	BP
GO:1900195	positive regulation of oocyte maturation	6	3	0.55	0.01212	up	BP
GO:1905832	positive regulation of spindle assembly	6	3	0.55	0.01212	up	BP
GO:1903753	negative regulation of p38MAPK cascade	6	3	0.55	0.01212	up	BP
GO:0043588	skin development	254	36	23.07	0.01227	up	BP
GO:0045428	regulation of nitric oxide biosynthetic process	88	15	7.99	0.01242	up	BP
GO:0042866	pyruvate biosynthetic process	57	11	5.18	0.01245	up	BP
GO:0019693	ribose phosphate metabolic process	563	105	51.14	0.01247	up	BP
GO:0010565	regulation of cellular ketone metabolic process	129	25	11.72	0.01252	up	BP
GO:0007568	aging	448	55	40.7	0.01288	up	BP
GO:0062197	cellular response to chemical stress	382	48	34.7	0.01299	up	BP
GO:0033865	nucleoside bisphosphate metabolic process	128	39	11.63	0.01306	up	BP
GO:0033875	ribonucleoside bisphosphate metabolic process	128	39	11.63	0.01306	up	BP
GO:0034032	purine nucleoside bisphosphate metabolic process	128	39	11.63	0.01306	up	BP
GO:0050999	regulation of nitric-oxide synthase activity	50	10	4.54	0.01314	up	BP
GO:0032373	positive regulation of sterol transport	29	7	2.63	0.01318	up	BP
GO:0032376	positive regulation of cholesterol transport	29	7	2.63	0.01318	up	BP
GO:0070831	basement membrane assembly	11	4	1	0.01328	up	BP
GO:0035999	tetrahydrofolate interconversion	11	4	1	0.01328	up	BP
GO:0060282	positive regulation of oocyte development	11	4	1	0.01328	up	BP
GO:0045104	intermediate filament cytoskeleton organization	43	9	3.91	0.01362	up	BP
GO:0032642	regulation of chemokine production	81	14	7.36	0.01371	up	BP
GO:0009584	detection of visible light	36	8	3.27	0.01372	up	BP
GO:0010288	response to lead ion	36	8	3.27	0.01372	up	BP
GO:0080164	regulation of nitric oxide metabolic process	89	15	8.08	0.01372	up	BP
GO:0010035	response to inorganic substance	772	88	70.13	0.01439	up	BP
GO:0032272	negative regulation of protein polymerization	76	19	6.9	0.01451	up	BP
GO:0071071	regulation of phospholipid biosynthetic process	23	6	2.09	0.01453	up	BP
GO:0042135	neurotransmitter catabolic process	23	6	2.09	0.01453	up	BP
GO:0010866	regulation of triglyceride biosynthetic process	23	6	2.09	0.01453	up	BP
GO:0051307	meiotic chromosome separation	23	6	2.09	0.01453	up	BP
GO:0006637	acyl-CoA metabolic process	105	36	9.54	0.01457	up	BP
GO:0035383	thioester metabolic process	105	36	9.54	0.01457	up	BP
GO:0006820	anion transport	570	80	51.78	0.01472	up	BP
GO:0051972	regulation of telomerase activity	51	10	4.63	0.01505	up	BP
GO:0019886	antigen processing and presentation of exogenous peptide antigen via MHC class II	90	15	8.18	0.01513	up	BP
GO:0055117	regulation of cardiac muscle contraction	80	18	7.27	0.01569	up	BP
GO:0017157	regulation of exocytosis	193	27	17.53	0.0157	up	BP
GO:0009583	detection of light stimulus	44	9	4	0.01578	up	BP
GO:1902745	positive regulation of lamellipodium organization	30	7	2.73	0.01587	up	BP
GO:0050849	negative regulation of calcium-mediated signaling	30	7	2.73	0.01587	up	BP
GO:0043268	positive regulation of potassium ion transport	30	7	2.73	0.01587	up	BP
GO:1904407	positive regulation of nitric oxide metabolic process	59	11	5.36	0.01599	up	BP
GO:0045429	positive regulation of nitric oxide biosynthetic process	59	11	5.36	0.01599	up	BP
GO:2001171	positive regulation of ATP biosynthetic process	37	8	3.36	0.01615	up	BP
GO:0070509	calcium ion import	69	14	6.27	0.01636	up	BP
GO:1901135	carbohydrate derivative metabolic process	1210	171	109.92	0.01647	up	BP
GO:0009259	ribonucleotide metabolic process	550	103	49.96	0.01663	up	BP
GO:0042445	hormone metabolic process	212	29	19.26	0.01682	up	BP
GO:0072655	establishment of protein localization to mitochondrion	116	18	10.54	0.01686	up	BP
GO:0007044	cell-substrate junction assembly	117	23	10.63	0.0172	up	BP
GO:0150115	cell-substrate junction organization	117	23	10.63	0.0172	up	BP
GO:0008299	isoprenoid biosynthetic process	26	8	2.36	0.0178	up	BP
GO:0051783	regulation of nuclear division	205	39	18.62	0.0179	up	BP
GO:0060351	cartilage development involved in endochondral bone morphogenesis	45	9	4.09	0.01818	up	BP
GO:0051547	regulation of keratinocyte migration	12	4	1.09	0.01852	up	BP
GO:0008655	pyrimidine-containing compound salvage	12	4	1.09	0.01852	up	BP
GO:0086036	regulation of cardiac muscle cell membrane potential	12	4	1.09	0.01852	up	BP
GO:0051974	negative regulation of telomerase activity	12	4	1.09	0.01852	up	BP
GO:0019372	lipoxygenase pathway	12	4	1.09	0.01852	up	BP
GO:0038065	collagen-activated signaling pathway	12	4	1.09	0.01852	up	BP
GO:0010359	regulation of anion channel activity	12	4	1.09	0.01852	up	BP
GO:0060509	type I pneumocyte differentiation	12	4	1.09	0.01852	up	BP
GO:1905881	positive regulation of oogenesis	12	4	1.09	0.01852	up	BP
GO:0034375	high-density lipoprotein particle remodeling	12	4	1.09	0.01852	up	BP
GO:0043097	pyrimidine nucleoside salvage	12	4	1.09	0.01852	up	BP
GO:0034433	steroid esterification	12	4	1.09	0.01852	up	BP
GO:0034434	sterol esterification	12	4	1.09	0.01852	up	BP
GO:0034435	cholesterol esterification	12	4	1.09	0.01852	up	BP
GO:0090193	positive regulation of glomerulus development	12	4	1.09	0.01852	up	BP
GO:0009593	detection of chemical stimulus	38	8	3.45	0.01887	up	BP
GO:0001975	response to amphetamine	38	8	3.45	0.01887	up	BP
GO:0051294	establishment of spindle orientation	38	8	3.45	0.01887	up	BP
GO:0010882	regulation of cardiac muscle contraction by calcium ion signaling	31	7	2.82	0.01894	up	BP
GO:0051016	barbed-end actin filament capping	22	8	2	0.0191	up	BP
GO:0009743	response to carbohydrate	353	44	32.07	0.01913	up	BP
GO:0051546	keratinocyte migration	18	5	1.64	0.01927	up	BP
GO:0006688	glycosphingolipid biosynthetic process	18	5	1.64	0.01927	up	BP
GO:0098911	regulation of ventricular cardiac muscle cell action potential	18	5	1.64	0.01927	up	BP
GO:0016477	cell migration	1404	153	127.54	0.01971	up	BP
GO:0006527	arginine catabolic process	7	3	0.64	0.01979	up	BP
GO:0006545	glycine biosynthetic process	7	3	0.64	0.01979	up	BP
GO:0043622	cortical microtubule organization	7	3	0.64	0.01979	up	BP
GO:1902083	negative regulation of peptidyl-cysteine S-nitrosylation	7	3	0.64	0.01979	up	BP
GO:0022614	membrane to membrane docking	7	3	0.64	0.01979	up	BP
GO:0031580	membrane raft distribution	7	3	0.64	0.01979	up	BP
GO:0070950	regulation of neutrophil mediated killing of bacterium	7	3	0.64	0.01979	up	BP
GO:0070951	regulation of neutrophil mediated killing of gram-negative bacterium	7	3	0.64	0.01979	up	BP
GO:0071504	cellular response to heparin	7	3	0.64	0.01979	up	BP
GO:0044878	mitotic cytokinesis checkpoint signaling	7	3	0.64	0.01979	up	BP
GO:0001766	membrane raft polarization	7	3	0.64	0.01979	up	BP
GO:0010886	positive regulation of cholesterol storage	7	3	0.64	0.01979	up	BP
GO:1903862	positive regulation of oxidative phosphorylation	7	3	0.64	0.01979	up	BP
GO:0098909	regulation of cardiac muscle cell action potential involved in regulation of contraction	7	3	0.64	0.01979	up	BP
GO:0072656	maintenance of protein location in mitochondrion	7	3	0.64	0.01979	up	BP
GO:0007088	regulation of mitotic nuclear division	181	36	16.44	0.02001	up	BP
GO:0097164	ammonium ion metabolic process	171	27	15.53	0.02026	up	BP
GO:0017158	regulation of calcium ion-dependent exocytosis	69	12	6.27	0.02058	up	BP
GO:1902743	regulation of lamellipodium organization	46	9	4.18	0.02084	up	BP
GO:1900034	regulation of cellular response to heat	46	9	4.18	0.02084	up	BP
GO:0045103	intermediate filament-based process	46	9	4.18	0.02084	up	BP
GO:0006638	neutral lipid metabolic process	146	32	13.26	0.02114	up	BP
GO:0006639	acylglycerol metabolic process	146	32	13.26	0.02114	up	BP
GO:0016192	vesicle-mediated transport	1910	214	173.5	0.02139	up	BP
GO:0008016	regulation of heart contraction	204	35	18.53	0.02158	up	BP
GO:0045056	transcytosis	25	6	2.27	0.02181	up	BP
GO:0034453	microtubule anchoring	25	6	2.27	0.02181	up	BP
GO:0006809	nitric oxide biosynthetic process	94	15	8.54	0.02189	up	BP
GO:0007080	mitotic metaphase plate congression	39	8	3.54	0.02191	up	BP
GO:0046364	monosaccharide biosynthetic process	111	17	10.08	0.02231	up	BP
GO:0001885	endothelial cell development	86	14	7.81	0.0224	up	BP
GO:0032602	chemokine production	86	14	7.81	0.0224	up	BP
GO:0006636	unsaturated fatty acid biosynthetic process	32	7	2.91	0.0224	up	BP
GO:0060491	regulation of cell projection assembly	199	27	18.08	0.02259	up	BP
GO:0042542	response to hydrogen peroxide	190	26	17.26	0.0226	up	BP
GO:0061337	cardiac conduction	103	16	9.36	0.02314	up	BP
GO:0090118	receptor-mediated endocytosis involved in cholesterol transport	7	5	0.64	0.02314	up	BP
GO:0070585	protein localization to mitochondrion	120	18	10.9	0.02316	up	BP
GO:0045995	regulation of embryonic development	155	22	14.08	0.0235	up	BP
GO:0002495	antigen processing and presentation of peptide antigen via MHC class II	95	15	8.63	0.02389	up	BP
GO:0060627	regulation of vesicle-mediated transport	537	65	48.78	0.02395	up	BP
GO:1904355	positive regulation of telomere capping	19	5	1.73	0.02425	up	BP
GO:0009629	response to gravity	19	5	1.73	0.02425	up	BP
GO:0006979	response to oxidative stress	513	60	46.6	0.02453	up	BP
GO:1902237	positive regulation of endoplasmic reticulum stress-induced intrinsic apoptotic signaling pathway	13	4	1.18	0.02486	up	BP
GO:0033591	response to L-ascorbic acid	13	4	1.18	0.02486	up	BP
GO:0033623	regulation of integrin activation	13	4	1.18	0.02486	up	BP
GO:0044245	polysaccharide digestion	13	4	1.18	0.02486	up	BP
GO:0032308	positive regulation of prostaglandin secretion	13	4	1.18	0.02486	up	BP
GO:0007611	learning or memory	265	34	24.07	0.02492	up	BP
GO:0030835	negative regulation of actin filament depolymerization	44	11	4	0.02498	up	BP
GO:0001101	response to acid chemical	504	59	45.78	0.02518	up	BP
GO:0051290	protein heterotetramerization	40	8	3.63	0.02527	up	BP
GO:0014075	response to amine	63	11	5.72	0.02528	up	BP
GO:0046777	protein autophosphorylation	284	36	25.8	0.02535	up	BP
GO:0098754	detoxification	96	15	8.72	0.02603	up	BP
GO:0045185	maintenance of protein location	113	17	10.26	0.02612	up	BP
GO:0046134	pyrimidine nucleoside biosynthetic process	26	6	2.36	0.02624	up	BP
GO:0010893	positive regulation of steroid biosynthetic process	26	6	2.36	0.02624	up	BP
GO:0007017	microtubule-based process	864	127	78.49	0.02678	up	BP
GO:0015804	neutral amino acid transport	48	9	4.36	0.02698	up	BP
GO:0034404	nucleobase-containing small molecule biosynthetic process	184	25	16.71	0.02701	up	BP
GO:0007586	digestion	138	31	12.54	0.02704	up	BP
GO:0086065	cell communication involved in cardiac conduction	56	10	5.09	0.02784	up	BP
GO:0044380	protein localization to cytoskeleton	56	10	5.09	0.02784	up	BP
GO:0000226	microtubule cytoskeleton organization	553	96	50.23	0.02788	up	BP
GO:0001578	microtubule bundle formation	114	17	10.36	0.0282	up	BP
GO:0002504	antigen processing and presentation of peptide or polysaccharide antigen via MHC class II	97	15	8.81	0.0283	up	BP
GO:0046209	nitric oxide metabolic process	97	15	8.81	0.0283	up	BP
GO:0042133	neurotransmitter metabolic process	97	15	8.81	0.0283	up	BP
GO:0009150	purine ribonucleotide metabolic process	533	100	48.42	0.0283	up	BP
GO:0015908	fatty acid transport	112	25	10.17	0.02887	up	BP
GO:0035722	interleukin-12-mediated signaling pathway	41	8	3.72	0.02899	up	BP
GO:0071349	cellular response to interleukin-12	41	8	3.72	0.02899	up	BP
GO:0015985	energy coupled proton transport, down electrochemical gradient	27	11	2.45	0.02915	up	BP
GO:0015986	ATP synthesis coupled proton transport	27	11	2.45	0.02915	up	BP
GO:0009080	pyruvate family amino acid catabolic process	8	3	0.73	0.02956	up	BP
GO:0035754	B cell chemotaxis	8	3	0.73	0.02956	up	BP
GO:0006524	alanine catabolic process	8	3	0.73	0.02956	up	BP
GO:0051660	establishment of centrosome localization	8	3	0.73	0.02956	up	BP
GO:0051665	membrane raft localization	8	3	0.73	0.02956	up	BP
GO:0009157	deoxyribonucleoside monophosphate biosynthetic process	8	3	0.73	0.02956	up	BP
GO:0060052	neurofilament cytoskeleton organization	8	3	0.73	0.02956	up	BP
GO:0110011	regulation of basement membrane organization	8	3	0.73	0.02956	up	BP
GO:0060346	bone trabecula formation	8	3	0.73	0.02956	up	BP
GO:0070949	regulation of neutrophil mediated killing of symbiont cell	8	3	0.73	0.02956	up	BP
GO:0009642	response to light intensity	8	3	0.73	0.02956	up	BP
GO:1904261	positive regulation of basement membrane assembly involved in embryonic body morphogenesis	8	3	0.73	0.02956	up	BP
GO:1904259	regulation of basement membrane assembly involved in embryonic body morphogenesis	8	3	0.73	0.02956	up	BP
GO:1904823	purine nucleobase transmembrane transport	8	3	0.73	0.02956	up	BP
GO:0060729	intestinal epithelial structure maintenance	8	3	0.73	0.02956	up	BP
GO:2000774	positive regulation of cellular senescence	8	3	0.73	0.02956	up	BP
GO:0032380	regulation of intracellular sterol transport	8	3	0.73	0.02956	up	BP
GO:0032383	regulation of intracellular cholesterol transport	8	3	0.73	0.02956	up	BP
GO:0032377	regulation of intracellular lipid transport	8	3	0.73	0.02956	up	BP
GO:2001197	basement membrane assembly involved in embryonic body morphogenesis	8	3	0.73	0.02956	up	BP
GO:0034384	high-density lipoprotein particle clearance	8	3	0.73	0.02956	up	BP
GO:0090091	positive regulation of extracellular matrix disassembly	8	3	0.73	0.02956	up	BP
GO:0009067	aspartate family amino acid biosynthetic process	23	8	2.09	0.02972	up	BP
GO:0007283	spermatogenesis	460	54	41.79	0.02976	up	BP
GO:0006521	regulation of cellular amino acid metabolic process	20	5	1.82	0.02998	up	BP
GO:0046653	tetrahydrofolate metabolic process	20	5	1.82	0.02998	up	BP
GO:0009628	response to abiotic stimulus	1366	155	124.09	0.03016	up	BP
GO:0120032	regulation of plasma membrane bounded cell projection assembly	195	26	17.71	0.03019	up	BP
GO:0006897	endocytosis	683	79	62.04	0.03037	up	BP
GO:0034332	adherens junction organization	159	22	14.44	0.0304	up	BP
GO:0034754	cellular hormone metabolic process	115	17	10.45	0.0304	up	BP
GO:0009144	purine nucleoside triphosphate metabolic process	321	58	29.16	0.03058	up	BP
GO:0009612	response to mechanical stimulus	307	38	27.89	0.03068	up	BP
GO:0071479	cellular response to ionizing radiation	73	12	6.63	0.03079	up	BP
GO:0009636	response to toxic substance	625	73	56.77	0.03114	up	BP
GO:0001706	endoderm formation	65	11	5.9	0.03116	up	BP
GO:0071404	cellular response to low-density lipoprotein particle stimulus	27	6	2.45	0.03123	up	BP
GO:0010737	protein kinase A signaling	27	6	2.45	0.03123	up	BP
GO:0051156	glucose 6-phosphate metabolic process	27	6	2.45	0.03123	up	BP
GO:0090181	regulation of cholesterol metabolic process	66	21	6	0.03129	up	BP
GO:0006596	polyamine biosynthetic process	14	4	1.27	0.03236	up	BP
GO:0090266	regulation of mitotic cell cycle spindle assembly checkpoint	14	4	1.27	0.03236	up	BP
GO:0090231	regulation of spindle checkpoint	14	4	1.27	0.03236	up	BP
GO:0043691	reverse cholesterol transport	14	4	1.27	0.03236	up	BP
GO:0071073	positive regulation of phospholipid biosynthetic process	14	4	1.27	0.03236	up	BP
GO:0051988	regulation of attachment of spindle microtubules to kinetochore	14	4	1.27	0.03236	up	BP
GO:0000212	meiotic spindle organization	14	4	1.27	0.03236	up	BP
GO:0061476	response to anticoagulant	14	4	1.27	0.03236	up	BP
GO:0050860	negative regulation of T cell receptor signaling pathway	14	4	1.27	0.03236	up	BP
GO:1903504	regulation of mitotic spindle checkpoint	14	4	1.27	0.03236	up	BP
GO:0006750	glutathione biosynthetic process	14	4	1.27	0.03236	up	BP
GO:0009205	purine ribonucleoside triphosphate metabolic process	313	57	28.43	0.03272	up	BP
GO:0032231	regulation of actin filament bundle assembly	116	17	10.54	0.03272	up	BP
GO:0030810	positive regulation of nucleotide biosynthetic process	42	8	3.82	0.03306	up	BP
GO:0033238	regulation of cellular amine metabolic process	42	8	3.82	0.03306	up	BP
GO:0007019	microtubule depolymerization	42	8	3.82	0.03306	up	BP
GO:0010039	response to iron ion	42	8	3.82	0.03306	up	BP
GO:1900373	positive regulation of purine nucleotide biosynthetic process	42	8	3.82	0.03306	up	BP
GO:0034446	substrate adhesion-dependent cell spreading	104	20	9.45	0.03366	up	BP
GO:0030837	negative regulation of actin filament polymerization	54	12	4.91	0.03387	up	BP
GO:0008544	epidermis development	319	39	28.98	0.03417	up	BP
GO:0042180	cellular ketone metabolic process	205	32	18.62	0.03424	up	BP
GO:0007029	endoplasmic reticulum organization	66	11	6	0.03444	up	BP
GO:1990748	cellular detoxification	91	14	8.27	0.03466	up	BP
GO:0006165	nucleoside diphosphate phosphorylation	116	21	10.54	0.03491	up	BP
GO:1990778	protein localization to cell periphery	310	38	28.16	0.03494	up	BP
GO:0071402	cellular response to lipoprotein particle stimulus	35	7	3.18	0.03532	up	BP
GO:0009141	nucleoside triphosphate metabolic process	342	60	31.07	0.0356	up	BP
GO:2001057	reactive nitrogen species metabolic process	100	15	9.08	0.03599	up	BP
GO:0051591	response to cAMP	144	20	13.08	0.03641	up	BP
GO:0071372	cellular response to follicle-stimulating hormone stimulus	21	5	1.91	0.03649	up	BP
GO:2000193	positive regulation of fatty acid transport	21	5	1.91	0.03649	up	BP
GO:2000811	negative regulation of anoikis	21	5	1.91	0.03649	up	BP
GO:0007006	mitochondrial membrane organization	146	29	13.26	0.0365	up	BP
GO:0035235	ionotropic glutamate receptor signaling pathway	28	6	2.54	0.03679	up	BP
GO:0086005	ventricular cardiac muscle cell action potential	28	6	2.54	0.03679	up	BP
GO:0071371	cellular response to gonadotropin stimulus	28	6	2.54	0.03679	up	BP
GO:1902175	regulation of oxidative stress-induced intrinsic apoptotic signaling pathway	28	6	2.54	0.03679	up	BP
GO:0048703	embryonic viscerocranium morphogenesis	28	6	2.54	0.03679	up	BP
GO:0003094	glomerular filtration	28	6	2.54	0.03679	up	BP
GO:1904666	regulation of ubiquitin protein ligase activity	28	6	2.54	0.03679	up	BP
GO:0071985	multivesicular body sorting pathway	28	6	2.54	0.03679	up	BP
GO:0032354	response to follicle-stimulating hormone	28	6	2.54	0.03679	up	BP
GO:0010800	positive regulation of peptidyl-threonine phosphorylation	28	6	2.54	0.03679	up	BP
GO:0090169	regulation of spindle assembly	28	6	2.54	0.03679	up	BP
GO:0006026	aminoglycan catabolic process	75	12	6.81	0.03708	up	BP
GO:0002064	epithelial cell development	283	35	25.71	0.03726	up	BP
GO:0070671	response to interleukin-12	43	8	3.91	0.0375	up	BP
GO:0030049	muscle filament sliding	43	8	3.91	0.0375	up	BP
GO:0001676	long-chain fatty acid metabolic process	92	14	8.36	0.0376	up	BP
GO:1904063	negative regulation of cation transmembrane transport	67	11	6.09	0.03796	up	BP
GO:0002753	cytoplasmic pattern recognition receptor signaling pathway	51	9	4.63	0.03841	up	BP
GO:0036498	IRE1-mediated unfolded protein response	59	10	5.36	0.03847	up	BP
GO:0000070	mitotic sister chromatid segregation	161	41	14.63	0.03879	up	BP
GO:0007229	integrin-mediated signaling pathway	101	15	9.17	0.03887	up	BP
GO:0034620	cellular response to unfolded protein	139	23	12.63	0.03935	up	BP
GO:0019363	pyridine nucleotide biosynthetic process	100	18	9.08	0.0399	up	BP
GO:0019359	nicotinamide nucleotide biosynthetic process	100	18	9.08	0.0399	up	BP
GO:1903426	regulation of reactive oxygen species biosynthetic process	119	17	10.81	0.04047	up	BP
GO:0033197	response to vitamin E	36	7	3.27	0.04054	up	BP
GO:0048247	lymphocyte chemotaxis	36	7	3.27	0.04054	up	BP
GO:0032507	maintenance of protein location in cell	76	12	6.9	0.04054	up	BP
GO:0042246	tissue regeneration	93	14	8.45	0.04072	up	BP
GO:0140014	mitotic nuclear division	302	71	27.43	0.04087	up	BP
GO:0006525	arginine metabolic process	15	4	1.36	0.04104	up	BP
GO:0018158	protein oxidation	15	4	1.36	0.04104	up	BP
GO:0042762	regulation of sulfur metabolic process	15	4	1.36	0.04104	up	BP
GO:0060670	branching involved in labyrinthine layer morphogenesis	15	4	1.36	0.04104	up	BP
GO:0150105	protein localization to cell-cell junction	15	4	1.36	0.04104	up	BP
GO:0001562	response to protozoan	15	4	1.36	0.04104	up	BP
GO:0045989	positive regulation of striated muscle contraction	15	4	1.36	0.04104	up	BP
GO:0039529	RIG-I signaling pathway	15	4	1.36	0.04104	up	BP
GO:0046939	nucleotide phosphorylation	118	21	10.72	0.04132	up	BP
GO:0009078	pyruvate family amino acid metabolic process	9	3	0.82	0.0414	up	BP
GO:0006563	L-serine metabolic process	9	3	0.82	0.0414	up	BP
GO:0006522	alanine metabolic process	9	3	0.82	0.0414	up	BP
GO:0051549	positive regulation of keratinocyte migration	9	3	0.82	0.0414	up	BP
GO:0070164	negative regulation of adiponectin secretion	9	3	0.82	0.0414	up	BP
GO:0035672	oligopeptide transmembrane transport	9	3	0.82	0.0414	up	BP
GO:0051969	regulation of transmission of nerve impulse	9	3	0.82	0.0414	up	BP
GO:0035900	response to isolation stress	9	3	0.82	0.0414	up	BP
GO:0009838	abscission	9	3	0.82	0.0414	up	BP
GO:0060452	positive regulation of cardiac muscle contraction	9	3	0.82	0.0414	up	BP
GO:0071896	protein localization to adherens junction	9	3	0.82	0.0414	up	BP
GO:0044341	sodium-dependent phosphate transport	9	3	0.82	0.0414	up	BP
GO:0071503	response to heparin	9	3	0.82	0.0414	up	BP
GO:2001046	positive regulation of integrin-mediated signaling pathway	9	3	0.82	0.0414	up	BP
GO:0032372	negative regulation of sterol transport	9	3	0.82	0.0414	up	BP
GO:0032375	negative regulation of cholesterol transport	9	3	0.82	0.0414	up	BP
GO:0032466	negative regulation of cytokinesis	9	3	0.82	0.0414	up	BP
GO:0032196	transposition	9	3	0.82	0.0414	up	BP
GO:0010872	regulation of cholesterol esterification	9	3	0.82	0.0414	up	BP
GO:0034465	response to carbon monoxide	9	3	0.82	0.0414	up	BP
GO:0072383	plus-end-directed vesicle transport along microtubule	9	3	0.82	0.0414	up	BP
GO:0045842	positive regulation of mitotic metaphase/anaphase transition	9	3	0.82	0.0414	up	BP
GO:0015671	oxygen transport	9	3	0.82	0.0414	up	BP
GO:0006102	isocitrate metabolic process	9	3	0.82	0.0414	up	BP
GO:0039536	negative regulation of RIG-I signaling pathway	9	3	0.82	0.0414	up	BP
GO:1901970	positive regulation of mitotic sister chromatid separation	9	3	0.82	0.0414	up	BP
GO:0006853	carnitine shuttle	9	3	0.82	0.0414	up	BP
GO:0031333	negative regulation of protein-containing complex assembly	145	26	13.17	0.04142	up	BP
GO:0009314	response to radiation	509	58	46.24	0.04144	up	BP
GO:0048232	male gamete generation	480	55	43.6	0.04225	up	BP
GO:0120178	steroid hormone biosynthetic process	44	8	4	0.04233	up	BP
GO:1903779	regulation of cardiac conduction	60	10	5.45	0.04256	up	BP
GO:0030811	regulation of nucleotide catabolic process	52	9	4.72	0.04285	up	BP
GO:0000731	DNA synthesis involved in DNA repair	52	9	4.72	0.04285	up	BP
GO:0006110	regulation of glycolytic process	52	9	4.72	0.04285	up	BP
GO:0072698	protein localization to microtubule cytoskeleton	52	9	4.72	0.04285	up	BP
GO:0003417	growth plate cartilage development	29	6	2.63	0.04295	up	BP
GO:0072576	liver morphogenesis	29	6	2.63	0.04295	up	BP
GO:0062013	positive regulation of small molecule metabolic process	150	30	13.63	0.04326	up	BP
GO:0009051	pentose-phosphate shunt, oxidative branch	4	2	0.36	0.04369	up	BP
GO:0006579	amino-acid betaine catabolic process	4	2	0.36	0.04369	up	BP
GO:0006682	galactosylceramide biosynthetic process	4	2	0.36	0.04369	up	BP
GO:0051695	actin filament uncapping	4	2	0.36	0.04369	up	BP
GO:0031335	regulation of sulfur amino acid metabolic process	4	2	0.36	0.04369	up	BP
GO:0035677	posterior lateral line neuromast hair cell development	4	2	0.36	0.04369	up	BP
GO:0090521	glomerular visceral epithelial cell migration	4	2	0.36	0.04369	up	BP
GO:0016198	axon choice point recognition	4	2	0.36	0.04369	up	BP
GO:0060018	astrocyte fate commitment	4	2	0.36	0.04369	up	BP
GO:0033292	T-tubule organization	4	2	0.36	0.04369	up	BP
GO:0000320	re-entry into mitotic cell cycle	4	2	0.36	0.04369	up	BP
GO:0042365	water-soluble vitamin catabolic process	4	2	0.36	0.04369	up	BP
GO:0048769	sarcomerogenesis	4	2	0.36	0.04369	up	BP
GO:0019375	galactolipid biosynthetic process	4	2	0.36	0.04369	up	BP
GO:0019322	pentose biosynthetic process	4	2	0.36	0.04369	up	BP
GO:1905031	regulation of membrane repolarization during cardiac muscle cell action potential	4	2	0.36	0.04369	up	BP
GO:2000481	positive regulation of cAMP-dependent protein kinase activity	4	2	0.36	0.04369	up	BP
GO:2000182	regulation of progesterone biosynthetic process	4	2	0.36	0.04369	up	BP
GO:0036372	opsin transport	4	2	0.36	0.04369	up	BP
GO:0045091	regulation of single stranded viral RNA replication via double stranded DNA intermediate	4	2	0.36	0.04369	up	BP
GO:2000223	regulation of BMP signaling pathway involved in heart jogging	4	2	0.36	0.04369	up	BP
GO:1905340	regulation of protein localization to kinetochore	4	2	0.36	0.04369	up	BP
GO:1905342	positive regulation of protein localization to kinetochore	4	2	0.36	0.04369	up	BP
GO:0044771	meiotic cell cycle phase transition	4	2	0.36	0.04369	up	BP
GO:1905448	positive regulation of mitochondrial ATP synthesis coupled electron transport	4	2	0.36	0.04369	up	BP
GO:0017055	negative regulation of RNA polymerase II transcription preinitiation complex assembly	4	2	0.36	0.04369	up	BP
GO:0003303	BMP signaling pathway involved in heart jogging	4	2	0.36	0.04369	up	BP
GO:0010133	proline catabolic process to glutamate	4	2	0.36	0.04369	up	BP
GO:0045337	farnesyl diphosphate biosynthetic process	4	2	0.36	0.04369	up	BP
GO:0003154	BMP signaling pathway involved in determination of left/right symmetry	4	2	0.36	0.04369	up	BP
GO:0042989	sequestering of actin monomers	4	2	0.36	0.04369	up	BP
GO:0072300	positive regulation of metanephric glomerulus development	4	2	0.36	0.04369	up	BP
GO:0032804	negative regulation of low-density lipoprotein particle receptor catabolic process	4	2	0.36	0.04369	up	BP
GO:1903286	regulation of potassium ion import	4	2	0.36	0.04369	up	BP
GO:1905907	negative regulation of amyloid fibril formation	4	2	0.36	0.04369	up	BP
GO:1903276	regulation of sodium ion export across plasma membrane	4	2	0.36	0.04369	up	BP
GO:1903225	negative regulation of endodermal cell differentiation	4	2	0.36	0.04369	up	BP
GO:0051309	female meiosis chromosome separation	4	2	0.36	0.04369	up	BP
GO:0050666	regulation of homocysteine metabolic process	4	2	0.36	0.04369	up	BP
GO:1901993	regulation of meiotic cell cycle phase transition	4	2	0.36	0.04369	up	BP
GO:0090176	microtubule cytoskeleton organization involved in establishment of planar polarity	4	2	0.36	0.04369	up	BP
GO:0006516	glycoprotein catabolic process	22	5	2	0.04381	up	BP
GO:0033599	regulation of mammary gland epithelial cell proliferation	22	5	2	0.04381	up	BP
GO:0045109	intermediate filament organization	22	5	2	0.04381	up	BP
GO:0034367	protein-containing complex remodeling	22	5	2	0.04381	up	BP
GO:0034368	protein-lipid complex remodeling	22	5	2	0.04381	up	BP
GO:0034369	plasma lipoprotein particle remodeling	22	5	2	0.04381	up	BP
GO:0032682	negative regulation of chemokine production	22	5	2	0.04381	up	BP
GO:0002082	regulation of oxidative phosphorylation	22	5	2	0.04381	up	BP
GO:0006206	pyrimidine nucleobase metabolic process	22	5	2	0.04381	up	BP
GO:0009064	glutamine family amino acid metabolic process	74	14	6.72	0.04514	up	BP
GO:0062012	regulation of small molecule metabolic process	397	69	36.06	0.04556	up	BP
GO:0032410	negative regulation of transporter activity	69	11	6.27	0.04573	up	BP
GO:0001667	ameboidal-type cell migration	404	47	36.7	0.04603	up	BP
GO:0042558	pteridine-containing compound metabolic process	37	7	3.36	0.04623	up	BP
GO:0051051	negative regulation of transport	473	54	42.97	0.04639	up	BP
GO:0099643	signal release from synapse	139	19	12.63	0.04664	up	BP
GO:0007269	neurotransmitter secretion	139	19	12.63	0.04664	up	BP
GO:0051602	response to electrical stimulus	61	10	5.54	0.04693	up	BP
GO:0070303	negative regulation of stress-activated protein kinase signaling cascade	53	9	4.81	0.04763	up	BP
GO:0019226	transmission of nerve impulse	53	9	4.81	0.04763	up	BP
GO:0032873	negative regulation of stress-activated MAPK cascade	53	9	4.81	0.04763	up	BP
GO:0072528	pyrimidine-containing compound biosynthetic process	53	9	4.81	0.04763	up	BP
GO:0006811	ion transport	1428	170	129.72	0.04767	up	BP
GO:0006082	organic acid metabolic process	1099	168	99.83	0.04837	up	BP
GO:0019752	carboxylic acid metabolic process	995	158	90.39	0.04861	up	BP
GO:0030010	establishment of cell polarity	158	21	14.35	0.04905	up	BP
GO:0002792	negative regulation of peptide secretion	122	17	11.08	0.04948	up	BP
GO:0033598	mammary gland epithelial cell proliferation	30	6	2.73	0.04972	up	BP
GO:0002026	regulation of the force of heart contraction	30	6	2.73	0.04972	up	BP
GO:0098869	cellular oxidant detoxification	87	13	7.9	0.04989	up	BP
GO:0003735	structural constituent of ribosome	152	79	11.55	1e-30	down	MF
GO:0032393	MHC class I receptor activity	12	12	0.91	3.4e-14	down	MF
GO:0003723	RNA binding	1088	221	82.64	6.9e-14	down	MF
GO:0008097	5S rRNA binding	18	13	1.37	1.5e-11	down	MF
GO:0003743	translation initiation factor activity	54	20	4.1	8.9e-10	down	MF
GO:0004252	serine-type endopeptidase activity	122	29	9.27	2.3e-08	down	MF
GO:0048027	mRNA 5'-UTR binding	25	11	1.9	7.6e-07	down	MF
GO:0008201	heparin binding	167	32	12.68	8.9e-07	down	MF
GO:0030515	snoRNA binding	28	16	2.13	1.1e-06	down	MF
GO:0042296	ISG15 transferase activity	7	6	0.53	1.2e-06	down	MF
GO:0003729	mRNA binding	228	47	17.32	1.6e-06	down	MF
GO:0070180	large ribosomal subunit rRNA binding	5	5	0.38	2.5e-06	down	MF
GO:0003746	translation elongation factor activity	15	8	1.14	4.3e-06	down	MF
GO:0004866	endopeptidase inhibitor activity	107	28	8.13	7.1e-06	down	MF
GO:0019843	rRNA binding	76	38	5.77	1.1e-05	down	MF
GO:0004857	enzyme inhibitor activity	315	49	23.93	2.9e-05	down	MF
GO:0070181	small ribosomal subunit rRNA binding	7	5	0.53	4.6e-05	down	MF
GO:1990948	ubiquitin ligase inhibitor activity	7	5	0.53	4.6e-05	down	MF
GO:0004867	serine-type endopeptidase inhibitor activity	59	14	4.48	0.0001	down	MF
GO:0004771	sterol esterase activity	12	6	0.91	0.00012	down	MF
GO:0000049	tRNA binding	62	14	4.71	0.00018	down	MF
GO:0035035	histone acetyltransferase binding	81	16	6.15	0.00033	down	MF
GO:0034511	U3 snoRNA binding	6	4	0.46	0.00044	down	MF
GO:0043022	ribosome binding	61	13	4.63	0.00055	down	MF
GO:0003724	RNA helicase activity	69	14	5.24	0.00058	down	MF
GO:0003730	mRNA 3'-UTR binding	74	14	5.62	0.00119	down	MF
GO:0045504	dynein heavy chain binding	67	13	5.09	0.00139	down	MF
GO:0047374	methylumbelliferyl-acetate deacetylase activity	4	3	0.3	0.00165	down	MF
GO:0001530	lipopolysaccharide binding	25	7	1.9	0.00203	down	MF
GO:0004806	triglyceride lipase activity	20	6	1.52	0.0029	down	MF
GO:0140078	class I DNA-(apurinic or apyrimidinic site) endonuclease activity	9	4	0.68	0.00306	down	MF
GO:1990446	U1 snRNP binding	9	4	0.68	0.00306	down	MF
GO:0016702	oxidoreductase activity, acting on single donors with incorporation of molecular oxygen, incorporation of two atoms of oxygen	27	7	2.05	0.00329	down	MF
GO:0030292	protein tyrosine kinase inhibitor activity	5	3	0.38	0.00389	down	MF
GO:0034513	box H/ACA snoRNA binding	5	3	0.38	0.00389	down	MF
GO:0016435	rRNA (guanine) methyltransferase activity	6	3	0.46	0.00734	down	MF
GO:0045505	dynein intermediate chain binding	73	12	5.54	0.00847	down	MF
GO:0016290	palmitoyl-CoA hydrolase activity	12	4	0.91	0.00999	down	MF
GO:0016842	amidine-lyase activity	12	4	0.91	0.00999	down	MF
GO:0005507	copper ion binding	42	8	3.19	0.0125	down	MF
GO:0140102	catalytic activity, acting on a rRNA	19	7	1.44	0.01344	down	MF
GO:0008649	rRNA methyltransferase activity	19	7	1.44	0.01344	down	MF
GO:0016423	tRNA (guanine) methyltransferase activity	13	4	0.99	0.01357	down	MF
GO:0031369	translation initiation factor binding	43	8	3.27	0.01437	down	MF
GO:0001094	TFIID-class transcription factor complex binding	8	3	0.61	0.01831	down	MF
GO:0017046	peptide hormone binding	46	8	3.49	0.02117	down	MF
GO:0005539	glycosaminoglycan binding	214	40	16.25	0.02123	down	MF
GO:0070034	telomerase RNA binding	22	5	1.67	0.02221	down	MF
GO:0008266	poly(U) RNA binding	22	5	1.67	0.02221	down	MF
GO:0001091	RNA polymerase II general transcription initiation factor binding	15	4	1.14	0.02294	down	MF
GO:0070891	lipoteichoic acid binding	9	3	0.68	0.02593	down	MF
GO:0035325	Toll-like receptor binding	9	3	0.68	0.02593	down	MF
GO:0003727	single-stranded RNA binding	97	15	7.37	0.02664	down	MF
GO:0001848	complement binding	23	5	1.75	0.02665	down	MF
GO:0046906	tetrapyrrole binding	105	14	7.98	0.02729	down	MF
GO:0030620	U2 snRNA binding	4	2	0.3	0.03118	down	MF
GO:0052827	inositol pentakisphosphate phosphatase activity	4	2	0.3	0.03118	down	MF
GO:0031691	alpha-1A adrenergic receptor binding	4	2	0.3	0.03118	down	MF
GO:0004897	ciliary neurotrophic factor receptor activity	4	2	0.3	0.03118	down	MF
GO:0015091	ferric iron transmembrane transporter activity	4	2	0.3	0.03118	down	MF
GO:0061929	gamma-glutamylaminecyclotransferase activity	4	2	0.3	0.03118	down	MF
GO:0004591	oxoglutarate dehydrogenase (succinyl-transferring) activity	4	2	0.3	0.03118	down	MF
GO:0015137	citrate transmembrane transporter activity	4	2	0.3	0.03118	down	MF
GO:0000702	oxidized base lesion DNA N-glycosylase activity	4	2	0.3	0.03118	down	MF
GO:0020037	heme binding	98	13	7.44	0.03385	down	MF
GO:0019958	C-X-C chemokine binding	10	3	0.76	0.03499	down	MF
GO:0042500	aspartic endopeptidase activity, intramembrane cleaving	10	3	0.76	0.03499	down	MF
GO:0004869	cysteine-type endopeptidase inhibitor activity	33	6	2.51	0.03571	down	MF
GO:0008143	poly(A) binding	25	5	1.9	0.03714	down	MF
GO:0043621	protein self-association	70	10	5.32	0.03783	down	MF
GO:0008173	RNA methyltransferase activity	77	13	5.85	0.0405	down	MF
GO:0070717	poly-purine tract binding	34	6	2.58	0.04068	down	MF
GO:0008238	exopeptidase activity	104	16	7.9	0.04095	down	MF
GO:0043021	ribonucleoprotein complex binding	142	27	10.79	0.04146	down	MF
GO:0005159	insulin-like growth factor receptor binding	18	4	1.37	0.04293	down	MF
GO:0044183	protein folding chaperone	26	5	1.97	0.04321	down	MF
GO:1990459	transferrin receptor binding	11	3	0.84	0.04546	down	MF
GO:0003899	DNA-directed 5'-3' RNA polymerase activity	35	6	2.66	0.04607	down	MF
GO:0004656	procollagen-proline 4-dioxygenase activity	5	2	0.38	0.04938	down	MF
GO:0019959	interleukin-8 binding	5	2	0.38	0.04938	down	MF
GO:0008494	translation activator activity	5	2	0.38	0.04938	down	MF
GO:0070251	pristanate-CoA ligase activity	5	2	0.38	0.04938	down	MF
GO:0003918	DNA topoisomerase type II (double strand cut, ATP-hydrolyzing) activity	5	2	0.38	0.04938	down	MF
GO:0034416	bisphosphoglycerate phosphatase activity	5	2	0.38	0.04938	down	MF
GO:0031692	alpha-1B adrenergic receptor binding	5	2	0.38	0.04938	down	MF
GO:0004359	glutaminase activity	5	2	0.38	0.04938	down	MF
GO:0050197	phytanate-CoA ligase activity	5	2	0.38	0.04938	down	MF
GO:0051717	inositol-1,3,4,5-tetrakisphosphate 3-phosphatase activity	5	2	0.38	0.04938	down	MF
GO:0101006	protein histidine phosphatase activity	5	2	0.38	0.04938	down	MF
GO:0048403	brain-derived neurotrophic factor binding	5	2	0.38	0.04938	down	MF
GO:0016825	hydrolase activity, acting on acid phosphorus-nitrogen bonds	5	2	0.38	0.04938	down	MF
GO:0015142	tricarboxylic acid transmembrane transporter activity	5	2	0.38	0.04938	down	MF
GO:0098821	BMP receptor activity	5	2	0.38	0.04938	down	MF
GO:0031762	follicle-stimulating hormone receptor binding	5	2	0.38	0.04938	down	MF
GO:0047747	cholate-CoA ligase activity	5	2	0.38	0.04938	down	MF
GO:0042056	chemoattractant activity	27	5	2.05	0.04984	down	MF
GO:0008017	microtubule binding	247	54	23.13	2.1e-09	up	MF
GO:0051978	lysophospholipid:sodium symporter activity	8	7	0.75	4.6e-07	up	MF
GO:0005524	ATP binding	1497	190	140.21	3.4e-06	up	MF
GO:0051015	actin filament binding	181	34	16.95	6.1e-05	up	MF
GO:0032052	bile acid binding	17	8	1.59	6.5e-05	up	MF
GO:0044548	S100 protein binding	17	8	1.59	6.5e-05	up	MF
GO:0102756	very-long-chain 3-ketoacyl-CoA synthase activity	4	4	0.37	7.7e-05	up	MF
GO:0009922	fatty acid elongase activity	4	4	0.37	7.7e-05	up	MF
GO:0102336	3-oxo-arachidoyl-CoA synthase activity	4	4	0.37	7.7e-05	up	MF
GO:0102337	3-oxo-cerotoyl-CoA synthase activity	4	4	0.37	7.7e-05	up	MF
GO:0102338	3-oxo-lignoceronyl-CoA synthase activity	4	4	0.37	7.7e-05	up	MF
GO:0005324	long-chain fatty acid transporter activity	14	7	1.31	0.00012	up	MF
GO:0005200	structural constituent of cytoskeleton	95	20	8.9	0.00042	up	MF
GO:0005509	calcium ion binding	527	72	49.36	0.00064	up	MF
GO:0097718	disordered domain specific binding	45	12	4.21	0.00067	up	MF
GO:0016887	ATP hydrolysis activity	406	58	38.03	0.00071	up	MF
GO:0060590	ATPase regulator activity	40	11	3.75	0.00084	up	MF
GO:0047444	N-acylneuraminate-9-phosphate synthase activity	6	4	0.56	0.00098	up	MF
GO:0050462	N-acetylneuraminate synthase activity	6	4	0.56	0.00098	up	MF
GO:0050998	nitric-oxide synthase binding	24	8	2.25	0.00108	up	MF
GO:0030276	clathrin binding	56	13	5.25	0.00165	up	MF
GO:0043168	anion binding	2762	337	258.7	0.00171	up	MF
GO:0016614	oxidoreductase activity, acting on CH-OH group of donors	127	28	11.9	0.00179	up	MF
GO:0050661	NADP binding	44	11	4.12	0.00196	up	MF
GO:0046933	proton-transporting ATP synthase activity, rotational mechanism	11	5	1.03	0.00204	up	MF
GO:0036094	small molecule binding	2509	316	235	0.00229	up	MF
GO:0016405	CoA-ligase activity	29	11	2.72	0.0023	up	MF
GO:0030229	very-low-density lipoprotein particle receptor activity	4	3	0.37	0.00305	up	MF
GO:0004768	stearoyl-CoA 9-desaturase activity	4	3	0.37	0.00305	up	MF
GO:0035175	histone kinase activity (H3-S10 specific)	4	3	0.37	0.00305	up	MF
GO:0004720	protein-lysine 6-oxidase activity	4	3	0.37	0.00305	up	MF
GO:0008422	beta-glucosidase activity	4	3	0.37	0.00305	up	MF
GO:0071532	ankyrin repeat binding	4	3	0.37	0.00305	up	MF
GO:0042803	protein homodimerization activity	876	106	82.05	0.00308	up	MF
GO:0030235	nitric-oxide synthase regulator activity	12	5	1.12	0.00323	up	MF
GO:0030169	low-density lipoprotein particle binding	17	6	1.59	0.00333	up	MF
GO:0050839	cell adhesion molecule binding	250	37	23.42	0.00341	up	MF
GO:0008307	structural constituent of muscle	54	12	5.06	0.00362	up	MF
GO:0005201	extracellular matrix structural constituent	54	12	5.06	0.00362	up	MF
GO:0043515	kinetochore binding	8	4	0.75	0.00394	up	MF
GO:0004745	NAD-retinol dehydrogenase activity	8	4	0.75	0.00394	up	MF
GO:0008781	N-acylneuraminate cytidylyltransferase activity	8	4	0.75	0.00394	up	MF
GO:0001671	ATPase activator activity	29	8	2.72	0.00414	up	MF
GO:0005543	phospholipid binding	412	55	38.59	0.0044	up	MF
GO:0005506	iron ion binding	130	22	12.18	0.00448	up	MF
GO:0002162	dystroglycan binding	13	5	1.22	0.00484	up	MF
GO:0102391	decanoate-CoA ligase activity	13	5	1.22	0.00484	up	MF
GO:0051287	NAD binding	70	14	6.56	0.00485	up	MF
GO:0016620	oxidoreductase activity, acting on the aldehyde or oxo group of donors, NAD or NADP as acceptor	39	11	3.65	0.00594	up	MF
GO:0016878	acid-thiol ligase activity	34	13	3.18	0.00606	up	MF
GO:0009055	electron transfer activity	134	22	12.55	0.00647	up	MF
GO:0051766	inositol trisphosphate kinase activity	9	4	0.84	0.00656	up	MF
GO:0008865	fructokinase activity	5	3	0.47	0.00709	up	MF
GO:0030060	L-malate dehydrogenase activity	5	3	0.47	0.00709	up	MF
GO:0044729	hemi-methylated DNA-binding	5	3	0.47	0.00709	up	MF
GO:0019158	mannokinase activity	5	3	0.47	0.00709	up	MF
GO:0042625	ATPase-coupled ion transmembrane transporter activity	59	12	5.53	0.00765	up	MF
GO:0003756	protein disulfide isomerase activity	20	6	1.87	0.00818	up	MF
GO:0016628	oxidoreductase activity, acting on the CH-CH group of donors, NAD or NADP as acceptor	26	7	2.44	0.00832	up	MF
GO:0003777	microtubule motor activity	98	20	9.18	0.00927	up	MF
GO:0008574	plus-end-directed microtubule motor activity	15	5	1.4	0.00965	up	MF
GO:0016616	oxidoreductase activity, acting on the CH-OH group of donors, NAD or NADP as acceptor	115	24	10.77	0.0128	up	MF
GO:0017166	vinculin binding	16	5	1.5	0.01297	up	MF
GO:0034190	apolipoprotein receptor binding	6	3	0.56	0.0132	up	MF
GO:0004340	glucokinase activity	6	3	0.56	0.0132	up	MF
GO:0035374	chondroitin sulfate binding	6	3	0.56	0.0132	up	MF
GO:0000287	magnesium ion binding	228	32	21.36	0.0132	up	MF
GO:0005504	fatty acid binding	49	10	4.59	0.01396	up	MF
GO:0098631	cell adhesion mediator activity	29	7	2.72	0.01542	up	MF
GO:0031267	small GTPase binding	581	70	54.42	0.01613	up	MF
GO:0008022	protein C-terminus binding	267	36	25.01	0.01626	up	MF
GO:0005544	calcium-dependent phospholipid binding	36	8	3.37	0.01628	up	MF
GO:0004467	long-chain fatty acid-CoA ligase activity	17	5	1.59	0.01699	up	MF
GO:0019855	calcium channel inhibitor activity	17	5	1.59	0.01699	up	MF
GO:0048306	calcium-dependent protein binding	73	13	6.84	0.01708	up	MF
GO:0005178	integrin binding	146	22	13.67	0.0171	up	MF
GO:0043177	organic acid binding	215	30	20.14	0.01729	up	MF
GO:0008092	cytoskeletal protein binding	947	146	88.7	0.01793	up	MF
GO:0031072	heat shock protein binding	148	22	13.86	0.01977	up	MF
GO:0030547	signaling receptor inhibitor activity	12	4	1.12	0.02053	up	MF
GO:0019842	vitamin binding	132	20	12.36	0.02108	up	MF
GO:0016209	antioxidant activity	75	13	7.02	0.02109	up	MF
GO:0004028	3-chloroallyl aldehyde dehydrogenase activity	7	3	0.66	0.0215	up	MF
GO:0016813	hydrolase activity, acting on carbon-nitrogen (but not peptide) bonds, in linear amidines	7	3	0.66	0.0215	up	MF
GO:0048019	receptor antagonist activity	7	3	0.66	0.0215	up	MF
GO:0035673	oligopeptide transmembrane transporter activity	7	3	0.66	0.0215	up	MF
GO:0051087	chaperone binding	117	18	10.96	0.02408	up	MF
GO:0046912	acyltransferase, acyl groups converted into alkyl on transfer	5	4	0.47	0.02458	up	MF
GO:0003785	actin monomer binding	25	6	2.34	0.02498	up	MF
GO:0035173	histone kinase activity	23	8	2.15	0.02705	up	MF
GO:0005536	glucose binding	19	5	1.78	0.0273	up	MF
GO:0034237	protein kinase A regulatory subunit binding	19	5	1.78	0.0273	up	MF
GO:0034452	dynactin binding	13	4	1.22	0.0275	up	MF
GO:0004111	creatine kinase activity	13	4	1.22	0.0275	up	MF
GO:0051959	dynein light intermediate chain binding	26	6	2.44	0.02998	up	MF
GO:0001618	virus receptor activity	79	13	7.4	0.03114	up	MF
GO:0140272	exogenous protein binding	79	13	7.4	0.03114	up	MF
GO:0008289	lipid binding	678	89	63.5	0.03152	up	MF
GO:0005344	oxygen carrier activity	8	3	0.75	0.03204	up	MF
GO:0005345	purine nucleobase transmembrane transporter activity	8	3	0.75	0.03204	up	MF
GO:0008440	inositol-1,4,5-trisphosphate 3-kinase activity	8	3	0.75	0.03204	up	MF
GO:0004448	isocitrate dehydrogenase activity	8	3	0.75	0.03204	up	MF
GO:0046982	protein heterodimerization activity	545	64	51.05	0.03341	up	MF
GO:0001786	phosphatidylserine binding	41	8	3.84	0.03398	up	MF
GO:0050660	flavin adenine dinucleotide binding	72	12	6.74	0.03432	up	MF
GO:0035091	phosphatidylinositol binding	247	32	23.13	0.03689	up	MF
GO:0050840	extracellular matrix binding	59	12	5.53	0.03694	up	MF
GO:0044325	transmembrane transporter binding	115	17	10.77	0.039	up	MF
GO:0043236	laminin binding	35	7	3.28	0.04074	up	MF
GO:0034185	apolipoprotein binding	21	5	1.97	0.04089	up	MF
GO:0072341	modified amino acid binding	74	12	6.93	0.04133	up	MF
GO:0000166	nucleotide binding	2139	271	200.35	0.04215	up	MF
GO:0015175	neutral amino acid transmembrane transporter activity	43	8	4.03	0.04375	up	MF
GO:0015205	nucleobase transmembrane transporter activity	9	3	0.84	0.04478	up	MF
GO:0070324	thyroid hormone binding	9	3	0.84	0.04478	up	MF
GO:1901265	nucleoside phosphate binding	2141	271	200.53	0.04479	up	MF
GO:0004030	aldehyde dehydrogenase [NAD(P)+] activity	17	6	1.59	0.04497	up	MF
GO:0008106	alcohol dehydrogenase (NADP+) activity	15	4	1.4	0.0452	up	MF
GO:0005041	low-density lipoprotein particle receptor activity	15	4	1.4	0.0452	up	MF
GO:0008374	O-acyltransferase activity	51	9	4.78	0.04531	up	MF
GO:0050897	cobalt ion binding	4	2	0.37	0.04627	up	MF
GO:1990254	keratin filament binding	4	2	0.37	0.04627	up	MF
GO:0033188	sphingomyelin synthase activity	4	2	0.37	0.04627	up	MF
GO:0004022	alcohol dehydrogenase (NAD+) activity	4	2	0.37	0.04627	up	MF
GO:0002153	steroid receptor RNA activator RNA binding	4	2	0.37	0.04627	up	MF
GO:0060001	minus-end directed microfilament motor activity	4	2	0.37	0.04627	up	MF
GO:0019136	deoxynucleoside kinase activity	4	2	0.37	0.04627	up	MF
GO:0002950	ceramide phosphoethanolamine synthase activity	4	2	0.37	0.04627	up	MF
GO:0038064	collagen receptor activity	4	2	0.37	0.04627	up	MF
GO:0004634	phosphopyruvate hydratase activity	4	2	0.37	0.04627	up	MF
GO:0010856	adenylate cyclase activator activity	4	2	0.37	0.04627	up	MF
GO:0004465	lipoprotein lipase activity	4	2	0.37	0.04627	up	MF
GO:1905394	retromer complex binding	4	2	0.37	0.04627	up	MF
GO:0008948	oxaloacetate decarboxylase activity	4	2	0.37	0.04627	up	MF
GO:0097016	L27 domain binding	4	2	0.37	0.04627	up	MF
GO:0047493	ceramide cholinephosphotransferase activity	4	2	0.37	0.04627	up	MF
GO:0097472	cyclin-dependent protein kinase activity	29	6	2.72	0.04873	up	MF
GO:0004033	aldo-keto reductase (NADP) activity	22	5	2.06	0.04898	up	MF
GO:0016491	oxidoreductase activity	658	111	61.63	0.04905	up	MF
GO:0019900	kinase binding	822	91	76.99	0.04926	up	MF

## Sheet: Table S7
Table S7: Gene ontoloty term enrichment results for Z. viviparus genes that are differentially expressed between populations from Darss vs. Varel-Mellum. The number of 'annotated' and 'significant' refer to the term abundance in the gene universe (i.e., all genes tested for differential expression) and in the set of differentially expressed genes, respectively. The number of 'expected' genes deno…
GO ID	Term	Annotated	Significant	Expected	p-value	regulaton	GO term category
GO:0006614	SRP-dependent cotranslational protein targeting to membrane	71	56	2.18	1e-30	down	BP
GO:0000184	nuclear-transcribed mRNA catabolic process, nonsense-mediated decay	104	57	3.19	1e-30	down	BP
GO:0006413	translational initiation	180	67	5.51	1e-30	down	BP
GO:0002181	cytoplasmic translation	80	37	2.45	1e-30	down	BP
GO:0006957	complement activation, alternative pathway	14	12	0.43	5e-17	down	BP
GO:0000028	ribosomal small subunit assembly	19	13	0.58	4e-16	down	BP
GO:0006958	complement activation, classical pathway	24	14	0.74	7.6e-16	down	BP
GO:0030449	regulation of complement activation	44	22	1.35	1.3e-14	down	BP
GO:2000257	regulation of protein activation cascade	46	22	1.41	2e-14	down	BP
GO:0002673	regulation of acute inflammatory response	89	24	2.73	4.7e-14	down	BP
GO:0050829	defense response to Gram-negative bacterium	69	18	2.11	1.6e-12	down	BP
GO:0070613	regulation of protein processing	122	27	3.74	4.2e-12	down	BP
GO:0006364	rRNA processing	193	35	5.91	3.9e-10	down	BP
GO:0019835	cytolysis	30	12	0.92	5e-09	down	BP
GO:0010951	negative regulation of endopeptidase activity	194	23	5.94	2.7e-08	down	BP
GO:0000027	ribosomal large subunit assembly	28	9	0.86	9e-08	down	BP
GO:0015833	peptide transport	1947	99	59.65	1.1e-07	down	BP
GO:0032620	interleukin-17 production	31	9	0.95	2.4e-07	down	BP
GO:0002576	platelet degranulation	129	17	3.95	4e-07	down	BP
GO:0001970	positive regulation of activation of membrane attack complex	4	4	0.12	8.7e-07	down	BP
GO:0097421	liver regeneration	71	12	2.18	1.4e-06	down	BP
GO:0072378	blood coagulation, fibrin clot formation	39	12	1.19	2.9e-06	down	BP
GO:0002474	antigen processing and presentation of peptide antigen via MHC class I	53	10	1.62	3.9e-06	down	BP
GO:1904401	cellular response to Thyroid stimulating hormone	5	4	0.15	4.2e-06	down	BP
GO:0006879	cellular iron ion homeostasis	69	11	2.11	7.2e-06	down	BP
GO:2000427	positive regulation of apoptotic cell clearance	6	4	0.18	1.2e-05	down	BP
GO:2000259	positive regulation of protein activation cascade	6	4	0.18	1.2e-05	down	BP
GO:0050830	defense response to Gram-positive bacterium	66	10	2.02	3e-05	down	BP
GO:0007597	blood coagulation, intrinsic pathway	24	6	0.74	6.7e-05	down	BP
GO:0019731	antibacterial humoral response	25	6	0.77	8.6e-05	down	BP
GO:0006953	acute-phase response	63	9	1.93	0.00012	down	BP
GO:0000462	maturation of SSU-rRNA from tricistronic rRNA transcript (SSU-rRNA, 5.8S rRNA, LSU-rRNA)	36	9	1.1	0.00013	down	BP
GO:0000463	maturation of LSU-rRNA from tricistronic rRNA transcript (SSU-rRNA, 5.8S rRNA, LSU-rRNA)	10	4	0.31	0.00016	down	BP
GO:2000258	negative regulation of protein activation cascade	11	4	0.34	0.00024	down	BP
GO:1904667	negative regulation of ubiquitin protein ligase activity	11	4	0.34	0.00024	down	BP
GO:0001798	positive regulation of type IIa hypersensitivity	5	3	0.15	0.00027	down	BP
GO:0032611	interleukin-1 beta production	91	10	2.79	0.00046	down	BP
GO:0061844	antimicrobial humoral immune response mediated by antimicrobial peptide	46	7	1.41	0.00046	down	BP
GO:0002367	cytokine production involved in immune response	108	11	3.31	0.00047	down	BP
GO:0051918	negative regulation of fibrinolysis	13	4	0.4	0.0005	down	BP
GO:0001869	negative regulation of complement activation, lectin pathway	6	3	0.18	0.00053	down	BP
GO:0075525	viral translational termination-reinitiation	6	3	0.18	0.00053	down	BP
GO:0045087	innate immune response	720	54	22.06	0.00059	down	BP
GO:1900102	negative regulation of endoplasmic reticulum unfolded protein response	14	4	0.43	0.00068	down	BP
GO:0071281	cellular response to iron ion	14	4	0.43	0.00068	down	BP
GO:0010955	negative regulation of protein processing	48	9	1.47	0.00069	down	BP
GO:0071393	cellular response to progesterone stimulus	15	4	0.46	0.00091	down	BP
GO:0018298	protein-chromophore linkage	7	3	0.21	0.00091	down	BP
GO:0007584	response to nutrient	374	23	11.46	0.00122	down	BP
GO:0031638	zymogen activation	67	10	2.05	0.00132	down	BP
GO:0042730	fibrinolysis	30	8	0.92	0.00145	down	BP
GO:0010575	positive regulation of vascular endothelial growth factor production	29	5	0.89	0.0017	down	BP
GO:0042273	ribosomal large subunit biogenesis	66	18	2.02	0.00175	down	BP
GO:0042167	heme catabolic process	9	3	0.28	0.00209	down	BP
GO:0002227	innate immune response in mucosa	9	3	0.28	0.00209	down	BP
GO:0001731	formation of translation preinitiation complex	9	3	0.28	0.00209	down	BP
GO:0000447	endonucleolytic cleavage in ITS1 to separate SSU-rRNA from 5.8S rRNA and LSU-rRNA from tricistronic rRNA transcript (SSU-rRNA, 5.8S rRNA, LSU-rRNA)	9	3	0.28	0.00209	down	BP
GO:0006412	translation	686	99	21.02	0.00214	down	BP
GO:1903363	negative regulation of cellular protein catabolic process	130	11	3.98	0.00216	down	BP
GO:0071353	cellular response to interleukin-4	32	5	0.98	0.00268	down	BP
GO:0010884	positive regulation of lipid storage	20	4	0.61	0.00285	down	BP
GO:0051704	multi-organism process	2144	87	65.68	0.00287	down	BP
GO:0034378	chylomicron assembly	10	3	0.31	0.00292	down	BP
GO:0031126	sno(s)RNA 3'-end processing	10	3	0.31	0.00292	down	BP
GO:0045745	positive regulation of G protein-coupled receptor signaling pathway	33	5	1.01	0.00308	down	BP
GO:0034250	positive regulation of cellular amide metabolic process	158	12	4.84	0.00342	down	BP
GO:0072574	hepatocyte proliferation	21	4	0.64	0.00343	down	BP
GO:0090207	regulation of triglyceride metabolic process	50	6	1.53	0.00405	down	BP
GO:1903319	positive regulation of protein maturation	36	5	1.1	0.00454	down	BP
GO:0071320	cellular response to cAMP	68	7	2.08	0.00467	down	BP
GO:0006402	mRNA catabolic process	295	69	9.04	0.00497	down	BP
GO:0032496	response to lipopolysaccharide	370	21	11.33	0.00502	down	BP
GO:0010757	negative regulation of plasminogen activation	12	3	0.37	0.00511	down	BP
GO:0006414	translational elongation	131	12	4.01	0.00518	down	BP
GO:0034756	regulation of iron ion transport	4	2	0.12	0.00539	down	BP
GO:0048254	snoRNA localization	4	2	0.12	0.00539	down	BP
GO:1904628	cellular response to phorbol 13-acetate 12-myristate	4	2	0.12	0.00539	down	BP
GO:0043489	RNA stabilization	53	6	1.62	0.00542	down	BP
GO:0010561	negative regulation of glycoprotein biosynthetic process	13	3	0.4	0.00649	down	BP
GO:0032026	response to magnesium ion	25	4	0.77	0.00659	down	BP
GO:0002507	tolerance induction	26	4	0.8	0.0076	down	BP
GO:0042415	norepinephrine metabolic process	14	3	0.43	0.00808	down	BP
GO:0045600	positive regulation of fat cell differentiation	58	6	1.78	0.00841	down	BP
GO:0072344	rescue of stalled ribosome	5	2	0.15	0.0088	down	BP
GO:0051343	positive regulation of cyclic-nucleotide phosphodiesterase activity	5	2	0.15	0.0088	down	BP
GO:2000435	negative regulation of protein neddylation	5	2	0.15	0.0088	down	BP
GO:1904211	membrane protein proteolysis involved in retrograde protein transport, ER to cytosol	5	2	0.15	0.0088	down	BP
GO:1902260	negative regulation of delayed rectifier potassium channel activity	5	2	0.15	0.0088	down	BP
GO:0060268	negative regulation of respiratory burst	5	2	0.15	0.0088	down	BP
GO:0032570	response to progesterone	93	11	2.85	0.00938	down	BP
GO:1904181	positive regulation of membrane depolarization	15	3	0.46	0.00987	down	BP
GO:0000054	ribosomal subunit export from nucleus	15	3	0.46	0.00987	down	BP
GO:0031960	response to corticosteroid	298	17	9.13	0.01048	down	BP
GO:0046461	neutral lipid catabolic process	45	5	1.38	0.01175	down	BP
GO:0046464	acylglycerol catabolic process	45	5	1.38	0.01175	down	BP
GO:0034379	very-low-density lipoprotein particle assembly	16	3	0.49	0.01187	down	BP
GO:2000345	regulation of hepatocyte proliferation	16	3	0.49	0.01187	down	BP
GO:0048875	chemical homeostasis within a tissue	16	3	0.49	0.01187	down	BP
GO:0045471	response to ethanol	209	13	6.4	0.01229	down	BP
GO:0097305	response to alcohol	359	21	11	0.01272	down	BP
GO:0060612	adipose tissue development	46	5	1.41	0.01286	down	BP
GO:1904036	negative regulation of epithelial cell apoptotic process	46	5	1.41	0.01286	down	BP
GO:0072182	regulation of nephron tubule epithelial cell differentiation	6	2	0.18	0.01294	down	BP
GO:0018350	protein esterification	6	2	0.18	0.01294	down	BP
GO:2000347	positive regulation of hepatocyte proliferation	6	2	0.18	0.01294	down	BP
GO:2000543	positive regulation of gastrulation	6	2	0.18	0.01294	down	BP
GO:0006417	regulation of translation	412	23	12.62	0.01335	down	BP
GO:0007565	female pregnancy	258	15	7.9	0.01336	down	BP
GO:0051384	response to glucocorticoid	282	16	8.64	0.01342	down	BP
GO:0045861	negative regulation of proteolysis	345	36	10.57	0.01355	down	BP
GO:0060674	placenta blood vessel development	47	5	1.44	0.01404	down	BP
GO:0048255	mRNA stabilization	48	5	1.47	0.01529	down	BP
GO:0045727	positive regulation of translation	127	9	3.89	0.01612	down	BP
GO:0045807	positive regulation of endocytosis	173	11	5.3	0.01757	down	BP
GO:0051029	rRNA transport	7	2	0.21	0.01775	down	BP
GO:0010700	negative regulation of norepinephrine secretion	7	2	0.21	0.01775	down	BP
GO:1990418	response to insulin-like growth factor stimulus	7	2	0.21	0.01775	down	BP
GO:0044258	intestinal lipid catabolic process	7	2	0.21	0.01775	down	BP
GO:0042268	regulation of cytolysis	7	2	0.21	0.01775	down	BP
GO:0010966	regulation of phosphate transport	7	2	0.21	0.01775	down	BP
GO:0036476	neuron death in response to hydrogen peroxide	7	2	0.21	0.01775	down	BP
GO:0002638	negative regulation of immunoglobulin production	7	2	0.21	0.01775	down	BP
GO:1903207	regulation of hydrogen peroxide-induced neuron death	7	2	0.21	0.01775	down	BP
GO:1903208	negative regulation of hydrogen peroxide-induced neuron death	7	2	0.21	0.01775	down	BP
GO:0010037	response to carbon dioxide	7	2	0.21	0.01775	down	BP
GO:0048669	collateral sprouting in absence of injury	7	2	0.21	0.01775	down	BP
GO:0042998	positive regulation of Golgi to plasma membrane protein transport	7	2	0.21	0.01775	down	BP
GO:0042985	negative regulation of amyloid precursor protein biosynthetic process	7	2	0.21	0.01775	down	BP
GO:0042981	regulation of apoptotic process	1650	65	50.55	0.01896	down	BP
GO:0046890	regulation of lipid biosynthetic process	198	12	6.07	0.01899	down	BP
GO:0010523	negative regulation of calcium ion transport into cytosol	19	3	0.58	0.0192	down	BP
GO:0006919	activation of cysteine-type endopeptidase activity involved in apoptotic process	89	7	2.73	0.01928	down	BP
GO:0044364	disruption of cells of other organism	34	4	1.04	0.01948	down	BP
GO:0010954	positive regulation of protein processing	34	4	1.04	0.01948	down	BP
GO:0043280	positive regulation of cysteine-type endopeptidase activity involved in apoptotic process	133	9	4.07	0.02114	down	BP
GO:0031214	biomineral tissue development	133	9	4.07	0.02114	down	BP
GO:0110148	biomineralization	133	9	4.07	0.02114	down	BP
GO:0010608	posttranscriptional regulation of gene expression	569	32	17.43	0.02139	down	BP
GO:0007566	embryo implantation	71	6	2.18	0.02141	down	BP
GO:0051412	response to corticosterone	35	4	1.07	0.02148	down	BP
GO:0033687	osteoblast proliferation	35	4	1.07	0.02148	down	BP
GO:0000154	rRNA modification	35	4	1.07	0.02148	down	BP
GO:0032986	protein-DNA complex disassembly	20	3	0.61	0.02209	down	BP
GO:0000056	ribosomal small subunit export from nucleus	8	2	0.25	0.02319	down	BP
GO:0048539	bone marrow development	8	2	0.25	0.02319	down	BP
GO:0007259	receptor signaling pathway via JAK-STAT	136	9	4.17	0.02403	down	BP
GO:0051385	response to mineralocorticoid	54	5	1.65	0.02437	down	BP
GO:0097696	receptor signaling pathway via STAT	137	9	4.2	0.02505	down	BP
GO:0031017	exocrine pancreas development	21	3	0.64	0.0252	down	BP
GO:0042104	positive regulation of activated T cell proliferation	21	3	0.64	0.0252	down	BP
GO:0016540	protein autoprocessing	21	3	0.64	0.0252	down	BP
GO:0010941	regulation of cell death	1826	70	55.94	0.02611	down	BP
GO:0044706	multi-multicellular organism process	281	15	8.61	0.02658	down	BP
GO:0097529	myeloid leukocyte migration	162	10	4.96	0.02748	down	BP
GO:0043067	regulation of programmed cell death	1683	65	51.56	0.02769	down	BP
GO:0097066	response to thyroid hormone	56	5	1.72	0.02802	down	BP
GO:2001024	negative regulation of response to drug	38	4	1.16	0.0282	down	BP
GO:0030157	pancreatic juice secretion	22	3	0.67	0.02853	down	BP
GO:0046514	ceramide catabolic process	22	3	0.67	0.02853	down	BP
GO:0010896	regulation of triglyceride catabolic process	9	2	0.28	0.02922	down	BP
GO:0035900	response to isolation stress	9	2	0.28	0.02922	down	BP
GO:0001682	tRNA 5'-leader removal	9	2	0.28	0.02922	down	BP
GO:1902255	positive regulation of intrinsic apoptotic signaling pathway by p53 class mediator	9	2	0.28	0.02922	down	BP
GO:0042983	amyloid precursor protein biosynthetic process	9	2	0.28	0.02922	down	BP
GO:0042984	regulation of amyloid precursor protein biosynthetic process	9	2	0.28	0.02922	down	BP
GO:1901569	fatty acid derivative catabolic process	9	2	0.28	0.02922	down	BP
GO:2000059	negative regulation of ubiquitin-dependent protein catabolic process	97	7	2.97	0.02929	down	BP
GO:1902373	negative regulation of mRNA catabolic process	57	5	1.75	0.02997	down	BP
GO:0043062	extracellular structure organization	388	19	11.89	0.03024	down	BP
GO:0030212	hyaluronan metabolic process	39	4	1.19	0.03068	down	BP
GO:0075294	positive regulation by symbiont of entry into host	58	5	1.78	0.03201	down	BP
GO:0046598	positive regulation of viral entry into host cell	58	5	1.78	0.03201	down	BP
GO:0010866	regulation of triglyceride biosynthetic process	23	3	0.7	0.03208	down	BP
GO:0034755	iron ion transmembrane transport	23	3	0.7	0.03208	down	BP
GO:0045669	positive regulation of osteoblast differentiation	78	6	2.39	0.0322	down	BP
GO:0048525	negative regulation of viral process	121	8	3.71	0.0325	down	BP
GO:0000956	nuclear-transcribed mRNA catabolic process	195	63	5.97	0.03379	down	BP
GO:0002224	toll-like receptor signaling pathway	123	8	3.77	0.03532	down	BP
GO:2001056	positive regulation of cysteine-type endopeptidase activity	146	9	4.47	0.03568	down	BP
GO:0035630	bone mineralization involved in bone maturation	10	2	0.31	0.0358	down	BP
GO:0070757	interleukin-35-mediated signaling pathway	10	2	0.31	0.0358	down	BP
GO:0019732	antifungal humoral response	10	2	0.31	0.0358	down	BP
GO:1990402	embryonic liver development	10	2	0.31	0.0358	down	BP
GO:0032464	positive regulation of protein homooligomerization	10	2	0.31	0.0358	down	BP
GO:1903012	positive regulation of bone development	10	2	0.31	0.0358	down	BP
GO:1990834	response to odorant	10	2	0.31	0.0358	down	BP
GO:0051818	disruption of cells of other organism involved in symbiotic interaction	10	2	0.31	0.0358	down	BP
GO:2000234	positive regulation of rRNA processing	10	2	0.31	0.0358	down	BP
GO:0090070	positive regulation of ribosome biogenesis	10	2	0.31	0.0358	down	BP
GO:2000696	regulation of epithelial cell differentiation involved in kidney development	10	2	0.31	0.0358	down	BP
GO:0070106	interleukin-27-mediated signaling pathway	10	2	0.31	0.0358	down	BP
GO:1901032	negative regulation of response to reactive oxygen species	24	3	0.74	0.03586	down	BP
GO:0001553	luteinization	24	3	0.74	0.03586	down	BP
GO:1903206	negative regulation of hydrogen peroxide-induced cell death	24	3	0.74	0.03586	down	BP
GO:2001039	negative regulation of cellular response to drug	24	3	0.74	0.03586	down	BP
GO:0022409	positive regulation of cell-cell adhesion	243	13	7.44	0.03674	down	BP
GO:0051092	positive regulation of NF-kappaB transcription factor activity	147	9	4.5	0.03703	down	BP
GO:0046596	regulation of viral entry into host cell	81	6	2.48	0.03774	down	BP
GO:0006575	cellular modified amino acid metabolic process	195	11	5.97	0.03785	down	BP
GO:0045765	regulation of angiogenesis	295	15	9.04	0.03837	down	BP
GO:0046579	positive regulation of Ras protein signal transduction	61	5	1.87	0.03862	down	BP
GO:0002438	acute inflammatory response to antigenic stimulus	30	6	0.92	0.03914	down	BP
GO:0031639	plasminogen activation	37	6	1.13	0.0392	down	BP
GO:2000765	regulation of cytoplasmic translation	25	3	0.77	0.03985	down	BP
GO:0009415	response to water	25	3	0.77	0.03985	down	BP
GO:0048514	blood vessel morphogenesis	647	28	19.82	0.04131	down	BP
GO:0070371	ERK1 and ERK2 cascade	298	15	9.13	0.04132	down	BP
GO:0043488	regulation of mRNA stability	174	10	5.33	0.04173	down	BP
GO:0030282	bone mineralization	105	7	3.22	0.04231	down	BP
GO:1904018	positive regulation of vasculature development	199	11	6.1	0.04281	down	BP
GO:0072075	metanephric mesenchyme development	11	2	0.34	0.04289	down	BP
GO:0072160	nephron tubule epithelial cell differentiation	11	2	0.34	0.04289	down	BP
GO:1900122	positive regulation of receptor binding	11	2	0.34	0.04289	down	BP
GO:0051791	medium-chain fatty acid metabolic process	11	2	0.34	0.04289	down	BP
GO:0051901	positive regulation of mitochondrial depolarization	11	2	0.34	0.04289	down	BP
GO:0006642	triglyceride mobilization	11	2	0.34	0.04289	down	BP
GO:0060136	embryonic process involved in female pregnancy	11	2	0.34	0.04289	down	BP
GO:0044764	multi-organism cellular process	26	3	0.8	0.04405	down	BP
GO:0002701	negative regulation of production of molecular mediator of immune response	26	3	0.8	0.04405	down	BP
GO:0048799	animal organ maturation	26	3	0.8	0.04405	down	BP
GO:0045472	response to ether	26	3	0.8	0.04405	down	BP
GO:1901798	positive regulation of signal transduction by p53 class mediator	26	3	0.8	0.04405	down	BP
GO:0048878	chemical homeostasis	1136	55	34.8	0.04497	down	BP
GO:0071222	cellular response to lipopolysaccharide	177	10	5.42	0.04596	down	BP
GO:0046503	glycerolipid catabolic process	64	5	1.96	0.046	down	BP
GO:1904035	regulation of epithelial cell apoptotic process	85	6	2.6	0.04603	down	BP
GO:0046677	response to antibiotic	463	21	14.18	0.0475	down	BP
GO:1901342	regulation of vasculature development	330	16	10.11	0.04767	down	BP
GO:1903902	positive regulation of viral life cycle	108	7	3.31	0.04803	down	BP
GO:0001829	trophectodermal cell differentiation	27	3	0.83	0.04847	down	BP
GO:0097242	amyloid-beta clearance	27	3	0.83	0.04847	down	BP
GO:0033500	carbohydrate homeostasis	305	15	9.34	0.04883	down	BP
GO:0045766	positive regulation of angiogenesis	179	10	5.48	0.04894	down	BP
GO:0035338	long-chain fatty-acyl-CoA biosynthetic process	16	8	0.56	2.2e-08	up	BP
GO:0051977	lysophospholipid transport	8	6	0.28	4.7e-08	up	BP
GO:0000281	mitotic cytokinesis	67	14	2.35	6.2e-08	up	BP
GO:0007094	mitotic spindle assembly checkpoint signaling	35	10	1.23	2.1e-07	up	BP
GO:0034501	protein localization to kinetochore	19	7	0.67	2.2e-06	up	BP
GO:0061732	mitochondrial acetyl-CoA biosynthetic process from pyruvate	8	5	0.28	2.7e-06	up	BP
GO:0006101	citrate metabolic process	45	10	1.58	2.7e-06	up	BP
GO:0015718	monocarboxylic acid transport	161	21	5.64	2.8e-06	up	BP
GO:0006099	tricarboxylic acid cycle	39	9	1.37	6.1e-06	up	BP
GO:0032000	positive regulation of fatty acid beta-oxidation	16	6	0.56	1.1e-05	up	BP
GO:0015909	long-chain fatty acid transport	79	12	2.77	1.8e-05	up	BP
GO:0051301	cell division	638	53	22.36	1.9e-05	up	BP
GO:0051256	mitotic spindle midzone assembly	11	5	0.39	2e-05	up	BP
GO:0019433	triglyceride catabolic process	36	8	1.26	2.7e-05	up	BP
GO:0042776	mitochondrial ATP synthesis coupled proton transport	19	6	0.67	3.3e-05	up	BP
GO:0006055	CMP-N-acetylneuraminate biosynthetic process	8	4	0.28	9.3e-05	up	BP
GO:0042311	vasodilation	32	7	1.12	9.7e-05	up	BP
GO:0034625	fatty acid elongation, monounsaturated fatty acid	4	3	0.14	0.00017	up	BP
GO:0034626	fatty acid elongation, polyunsaturated fatty acid	4	3	0.14	0.00017	up	BP
GO:0019367	fatty acid elongation, saturated fatty acid	4	3	0.14	0.00017	up	BP
GO:0031145	anaphase-promoting complex-dependent catabolic process	36	7	1.26	0.00021	up	BP
GO:0098869	cellular oxidant detoxification	87	11	3.05	0.00022	up	BP
GO:0016999	antibiotic metabolic process	134	14	4.7	0.00025	up	BP
GO:0006631	fatty acid metabolic process	371	37	13	0.00026	up	BP
GO:0046487	glyoxylate metabolic process	13	6	0.46	0.00026	up	BP
GO:0042761	very long-chain fatty acid biosynthetic process	10	4	0.35	0.00026	up	BP
GO:0007076	mitotic chromosome condensation	18	5	0.63	0.0003	up	BP
GO:0006163	purine nucleotide metabolic process	574	58	20.12	0.00031	up	BP
GO:0007088	regulation of mitotic nuclear division	181	26	6.34	0.00035	up	BP
GO:0019470	4-hydroxyproline catabolic process	5	3	0.18	0.00041	up	BP
GO:0050916	sensory perception of sweet taste	5	3	0.18	0.00041	up	BP
GO:0046949	fatty-acyl-CoA biosynthetic process	28	12	0.98	0.00055	up	BP
GO:0006103	2-oxoglutarate metabolic process	31	6	1.09	0.00063	up	BP
GO:0007096	regulation of exit from mitosis	21	5	0.74	0.00066	up	BP
GO:0031115	negative regulation of microtubule polymerization	21	5	0.74	0.00066	up	BP
GO:0046496	nicotinamide nucleotide metabolic process	156	17	5.47	0.0007	up	BP
GO:0010032	meiotic chromosome condensation	6	3	0.21	0.00079	up	BP
GO:0045329	carnitine biosynthetic process	6	3	0.21	0.00079	up	BP
GO:1905832	positive regulation of spindle assembly	6	3	0.21	0.00079	up	BP
GO:0006123	mitochondrial electron transport, cytochrome c to oxygen	13	4	0.46	0.00083	up	BP
GO:0006206	pyrimidine nucleobase metabolic process	22	5	0.77	0.00083	up	BP
GO:0006749	glutathione metabolic process	46	7	1.61	0.00102	up	BP
GO:0008608	attachment of spindle microtubules to kinetochore	34	6	1.19	0.00105	up	BP
GO:0007077	mitotic nuclear membrane disassembly	14	4	0.49	0.00113	up	BP
GO:0010873	positive regulation of cholesterol esterification	7	3	0.25	0.00135	up	BP
GO:0006741	NADP biosynthetic process	7	3	0.25	0.00135	up	BP
GO:0006545	glycine biosynthetic process	7	3	0.25	0.00135	up	BP
GO:0009205	purine ribonucleoside triphosphate metabolic process	313	27	10.97	0.0014	up	BP
GO:0050892	intestinal absorption	49	7	1.72	0.00149	up	BP
GO:0008203	cholesterol metabolic process	162	17	5.68	0.00152	up	BP
GO:0034383	low-density lipoprotein particle clearance	39	8	1.37	0.00162	up	BP
GO:0009168	purine ribonucleoside monophosphate biosynthetic process	129	12	4.52	0.0019	up	BP
GO:0060236	regulation of mitotic spindle organization	38	6	1.33	0.00191	up	BP
GO:0051382	kinetochore assembly	16	4	0.56	0.00194	up	BP
GO:0009157	deoxyribonucleoside monophosphate biosynthetic process	8	3	0.28	0.0021	up	BP
GO:0007080	mitotic metaphase plate congression	39	6	1.37	0.00219	up	BP
GO:0000086	G2/M transition of mitotic cell cycle	242	18	8.48	0.0022	up	BP
GO:0022900	electron transport chain	168	19	5.89	0.00227	up	BP
GO:0031581	hemidesmosome assembly	17	4	0.6	0.00246	up	BP
GO:0009263	deoxyribonucleotide biosynthetic process	17	4	0.6	0.00246	up	BP
GO:0072655	establishment of protein localization to mitochondrion	116	11	4.07	0.00249	up	BP
GO:0051290	protein heterotetramerization	40	6	1.4	0.0025	up	BP
GO:0097164	ammonium ion metabolic process	171	14	5.99	0.00278	up	BP
GO:0009150	purine ribonucleotide metabolic process	533	51	18.68	0.00289	up	BP
GO:0003417	growth plate cartilage development	29	5	1.02	0.00306	up	BP
GO:0006102	isocitrate metabolic process	9	3	0.32	0.00307	up	BP
GO:0010269	response to selenium ion	18	4	0.63	0.00308	up	BP
GO:0045840	positive regulation of mitotic nuclear division	56	7	1.96	0.00326	up	BP
GO:0045931	positive regulation of mitotic cell cycle	174	14	6.1	0.00326	up	BP
GO:0043154	negative regulation of cysteine-type endopeptidase activity involved in apoptotic process	104	10	3.64	0.00349	up	BP
GO:0016321	female meiosis chromosome segregation	7	4	0.25	0.00356	up	BP
GO:0032506	cytokinetic process	30	5	1.05	0.00357	up	BP
GO:0042632	cholesterol homeostasis	72	8	2.52	0.00359	up	BP
GO:0016126	sterol biosynthetic process	83	11	2.91	0.00398	up	BP
GO:0055081	anion homeostasis	58	7	2.03	0.00398	up	BP
GO:0019432	triglyceride biosynthetic process	44	6	1.54	0.00409	up	BP
GO:0019886	antigen processing and presentation of exogenous peptide antigen via MHC class II	90	9	3.15	0.00422	up	BP
GO:0051593	response to folic acid	20	4	0.7	0.00461	up	BP
GO:0042407	cristae formation	32	5	1.12	0.00476	up	BP
GO:0032787	monocarboxylic acid metabolic process	611	62	21.41	0.00567	up	BP
GO:0050873	brown fat cell differentiation	47	6	1.65	0.0057	up	BP
GO:0036109	alpha-linolenic acid metabolic process	11	3	0.39	0.00572	up	BP
GO:0051639	actin filament network formation	11	3	0.39	0.00572	up	BP
GO:0035999	tetrahydrofolate interconversion	11	3	0.39	0.00572	up	BP
GO:1905820	positive regulation of chromosome separation	11	3	0.39	0.00572	up	BP
GO:0071236	cellular response to antibiotic	186	14	6.52	0.00589	up	BP
GO:0097006	regulation of plasma lipoprotein particle levels	87	14	3.05	0.0059	up	BP
GO:0006641	triglyceride metabolic process	125	19	4.38	0.00628	up	BP
GO:0015804	neutral amino acid transport	48	6	1.68	0.00632	up	BP
GO:0031577	spindle checkpoint signaling	39	12	1.37	0.00676	up	BP
GO:0051383	kinetochore organization	20	6	0.7	0.00691	up	BP
GO:0019322	pentose biosynthetic process	4	2	0.14	0.00702	up	BP
GO:0048769	sarcomerogenesis	4	2	0.14	0.00702	up	BP
GO:0051309	female meiosis chromosome separation	4	2	0.14	0.00702	up	BP
GO:0032804	negative regulation of low-density lipoprotein particle receptor catabolic process	4	2	0.14	0.00702	up	BP
GO:0009051	pentose-phosphate shunt, oxidative branch	4	2	0.14	0.00702	up	BP
GO:1905448	positive regulation of mitochondrial ATP synthesis coupled electron transport	4	2	0.14	0.00702	up	BP
GO:1990379	lipid transport across blood-brain barrier	4	2	0.14	0.00702	up	BP
GO:0010133	proline catabolic process to glutamate	4	2	0.14	0.00702	up	BP
GO:2000813	negative regulation of barbed-end actin filament capping	4	2	0.14	0.00702	up	BP
GO:1990705	cholangiocyte proliferation	4	2	0.14	0.00702	up	BP
GO:0006081	cellular aldehyde metabolic process	78	13	2.73	0.00702	up	BP
GO:0051310	metaphase plate congression	51	9	1.79	0.00722	up	BP
GO:0010965	regulation of mitotic sister chromatid separation	58	14	2.03	0.00726	up	BP
GO:0009161	ribonucleoside monophosphate metabolic process	284	24	9.95	0.00739	up	BP
GO:0019372	lipoxygenase pathway	12	3	0.42	0.00743	up	BP
GO:0043097	pyrimidine nucleoside salvage	12	3	0.42	0.00743	up	BP
GO:0043651	linoleic acid metabolic process	12	3	0.42	0.00743	up	BP
GO:0002862	negative regulation of inflammatory response to antigenic stimulus	12	3	0.42	0.00743	up	BP
GO:0001765	membrane raft assembly	12	3	0.42	0.00743	up	BP
GO:0072521	purine-containing compound metabolic process	613	63	21.48	0.00773	up	BP
GO:0009067	aspartate family amino acid biosynthetic process	23	4	0.81	0.00776	up	BP
GO:1902850	microtubule cytoskeleton organization involved in mitosis	150	20	5.26	0.00786	up	BP
GO:0032465	regulation of cytokinesis	82	8	2.87	0.0079	up	BP
GO:0033047	regulation of mitotic sister chromatid segregation	72	15	2.52	0.00826	up	BP
GO:0018904	ether metabolic process	24	4	0.84	0.00906	up	BP
GO:0045540	regulation of cholesterol biosynthetic process	52	6	1.82	0.00933	up	BP
GO:0006119	oxidative phosphorylation	122	19	4.28	0.00987	up	BP
GO:0009593	detection of chemical stimulus	38	5	1.33	0.01	up	BP
GO:0070509	calcium ion import	69	7	2.42	0.01029	up	BP
GO:0010971	positive regulation of G2/M transition of mitotic cell cycle	25	4	0.88	0.0105	up	BP
GO:0009167	purine ribonucleoside monophosphate metabolic process	272	23	9.53	0.01057	up	BP
GO:0044282	small molecule catabolic process	465	34	16.3	0.01066	up	BP
GO:0046889	positive regulation of lipid biosynthetic process	90	10	3.15	0.01089	up	BP
GO:0009126	purine nucleoside monophosphate metabolic process	273	23	9.57	0.01111	up	BP
GO:0007051	spindle organization	177	23	6.2	0.01116	up	BP
GO:0070301	cellular response to hydrogen peroxide	123	10	4.31	0.01118	up	BP
GO:0016332	establishment or maintenance of polarity of embryonic epithelium	5	2	0.18	0.01142	up	BP
GO:0072385	minus-end-directed organelle transport along microtubule	5	2	0.18	0.01142	up	BP
GO:0019418	sulfide oxidation	5	2	0.18	0.01142	up	BP
GO:0008295	spermidine biosynthetic process	5	2	0.18	0.01142	up	BP
GO:0050912	detection of chemical stimulus involved in sensory perception of taste	5	2	0.18	0.01142	up	BP
GO:0046125	pyrimidine deoxyribonucleoside metabolic process	5	2	0.18	0.01142	up	BP
GO:0006272	leading strand elongation	5	2	0.18	0.01142	up	BP
GO:0031536	positive regulation of exit from mitosis	5	2	0.18	0.01142	up	BP
GO:0000912	assembly of actomyosin apparatus involved in cytokinesis	5	2	0.18	0.01142	up	BP
GO:0000915	actomyosin contractile ring assembly	5	2	0.18	0.01142	up	BP
GO:0070221	sulfide oxidation, using sulfide:quinone oxidoreductase	5	2	0.18	0.01142	up	BP
GO:0009609	response to symbiotic bacterium	5	2	0.18	0.01142	up	BP
GO:0030241	skeletal muscle myosin thick filament assembly	5	2	0.18	0.01142	up	BP
GO:0007052	mitotic spindle organization	121	18	4.24	0.01159	up	BP
GO:0055089	fatty acid homeostasis	14	3	0.49	0.01167	up	BP
GO:0010885	regulation of cholesterol storage	14	3	0.49	0.01167	up	BP
GO:1903504	regulation of mitotic spindle checkpoint	14	3	0.49	0.01167	up	BP
GO:0034374	low-density lipoprotein particle remodeling	14	3	0.49	0.01167	up	BP
GO:0006596	polyamine biosynthetic process	14	3	0.49	0.01167	up	BP
GO:0090266	regulation of mitotic cell cycle spindle assembly checkpoint	14	3	0.49	0.01167	up	BP
GO:0090231	regulation of spindle checkpoint	14	3	0.49	0.01167	up	BP
GO:0050860	negative regulation of T cell receptor signaling pathway	14	3	0.49	0.01167	up	BP
GO:0006695	cholesterol biosynthetic process	78	10	2.73	0.0117	up	BP
GO:1902653	secondary alcohol biosynthetic process	78	10	2.73	0.0117	up	BP
GO:0046394	carboxylic acid biosynthetic process	353	30	12.37	0.01174	up	BP
GO:0033561	regulation of water loss via skin	26	4	0.91	0.01207	up	BP
GO:0009404	toxin metabolic process	26	4	0.91	0.01207	up	BP
GO:0042987	amyloid precursor protein catabolic process	40	5	1.4	0.01239	up	BP
GO:0046364	monosaccharide biosynthetic process	111	11	3.89	0.01246	up	BP
GO:1903578	regulation of ATP metabolic process	89	8	3.12	0.01268	up	BP
GO:0044380	protein localization to cytoskeleton	56	6	1.96	0.01324	up	BP
GO:1902686	mitochondrial outer membrane permeabilization involved in programmed cell death	56	6	1.96	0.01324	up	BP
GO:0010737	protein kinase A signaling	27	4	0.95	0.01378	up	BP
GO:1902751	positive regulation of cell cycle G2/M phase transition	27	4	0.95	0.01378	up	BP
GO:0010878	cholesterol storage	15	3	0.53	0.01421	up	BP
GO:0060670	branching involved in labyrinthine layer morphogenesis	15	3	0.53	0.01421	up	BP
GO:0071688	striated muscle myosin thick filament assembly	15	3	0.53	0.01421	up	BP
GO:0018158	protein oxidation	15	3	0.53	0.01421	up	BP
GO:0016051	carbohydrate biosynthetic process	233	17	8.17	0.01457	up	BP
GO:1901028	regulation of mitochondrial outer membrane permeabilization involved in apoptotic signaling pathway	42	5	1.47	0.01513	up	BP
GO:0006334	nucleosome assembly	92	8	3.22	0.01528	up	BP
GO:0001676	long-chain fatty acid metabolic process	92	10	3.22	0.01544	up	BP
GO:0035794	positive regulation of mitochondrial membrane permeability	58	6	2.03	0.01558	up	BP
GO:0090307	mitotic spindle assembly	70	11	2.45	0.0161	up	BP
GO:0045132	meiotic chromosome segregation	85	12	2.98	0.01611	up	BP
GO:0006323	DNA packaging	170	16	5.96	0.01618	up	BP
GO:0042542	response to hydrogen peroxide	190	13	6.66	0.01643	up	BP
GO:0036155	acylglycerol acyl-chain remodeling	6	2	0.21	0.01674	up	BP
GO:0001574	ganglioside biosynthetic process	6	2	0.21	0.01674	up	BP
GO:1905908	positive regulation of amyloid fibril formation	6	2	0.21	0.01674	up	BP
GO:0044837	actomyosin contractile ring organization	6	2	0.21	0.01674	up	BP
GO:0009446	putrescine biosynthetic process	6	2	0.21	0.01674	up	BP
GO:2000371	regulation of DNA topoisomerase (ATP-hydrolyzing) activity	6	2	0.21	0.01674	up	BP
GO:2000373	positive regulation of DNA topoisomerase (ATP-hydrolyzing) activity	6	2	0.21	0.01674	up	BP
GO:0043648	dicarboxylic acid metabolic process	130	16	4.56	0.01683	up	BP
GO:0016127	sterol catabolic process	16	3	0.56	0.01704	up	BP
GO:0030953	astral microtubule organization	16	3	0.56	0.01704	up	BP
GO:0006107	oxaloacetate metabolic process	16	3	0.56	0.01704	up	BP
GO:0006707	cholesterol catabolic process	16	3	0.56	0.01704	up	BP
GO:0006863	purine nucleobase transport	16	3	0.56	0.01704	up	BP
GO:0006595	polyamine metabolic process	16	3	0.56	0.01704	up	BP
GO:0006662	glycerol ether metabolic process	16	3	0.56	0.01704	up	BP
GO:0010770	positive regulation of cell morphogenesis involved in differentiation	191	13	6.69	0.01709	up	BP
GO:0010389	regulation of G2/M transition of mitotic cell cycle	191	13	6.69	0.01709	up	BP
GO:1905039	carboxylic acid transmembrane transport	194	15	6.8	0.01722	up	BP
GO:1903825	organic acid transmembrane transport	194	15	6.8	0.01722	up	BP
GO:0007163	establishment or maintenance of cell polarity	233	15	8.17	0.01737	up	BP
GO:1903749	positive regulation of establishment of protein localization to mitochondrion	29	4	1.02	0.01766	up	BP
GO:0006140	regulation of nucleotide metabolic process	113	9	3.96	0.01772	up	BP
GO:0062013	positive regulation of small molecule metabolic process	150	16	5.26	0.01803	up	BP
GO:0072330	monocarboxylic acid biosynthetic process	246	19	8.62	0.01808	up	BP
GO:1905710	positive regulation of membrane permeability	60	6	2.1	0.01818	up	BP
GO:0006633	fatty acid biosynthetic process	125	13	4.38	0.01876	up	BP
GO:1901989	positive regulation of cell cycle phase transition	96	8	3.36	0.01931	up	BP
GO:0044283	small molecule biosynthetic process	731	53	25.62	0.01942	up	BP
GO:0034754	cellular hormone metabolic process	115	9	4.03	0.01964	up	BP
GO:1903747	regulation of establishment of protein localization to mitochondrion	45	5	1.58	0.01996	up	BP
GO:0044794	positive regulation by host of viral process	17	3	0.6	0.02016	up	BP
GO:0015851	nucleobase transport	17	3	0.6	0.02016	up	BP
GO:0046185	aldehyde catabolic process	17	3	0.6	0.02016	up	BP
GO:1902176	negative regulation of oxidative stress-induced intrinsic apoptotic signaling pathway	17	3	0.6	0.02016	up	BP
GO:0098656	anion transmembrane transport	351	22	12.3	0.02069	up	BP
GO:1901616	organic hydroxy compound catabolic process	62	6	2.17	0.02107	up	BP
GO:1900026	positive regulation of substrate adhesion-dependent cell spreading	46	5	1.61	0.02177	up	BP
GO:0071827	plasma lipoprotein particle organization	46	5	1.61	0.02177	up	BP
GO:0060713	labyrinthine layer morphogenesis	31	4	1.09	0.02215	up	BP
GO:0018149	peptide cross-linking	31	4	1.09	0.02215	up	BP
GO:0046835	carbohydrate phosphorylation	31	4	1.09	0.02215	up	BP
GO:0051984	positive regulation of chromosome segregation	31	4	1.09	0.02215	up	BP
GO:0042572	retinol metabolic process	31	4	1.09	0.02215	up	BP
GO:1901568	fatty acid derivative metabolic process	129	20	4.52	0.02232	up	BP
GO:1902017	regulation of cilium assembly	63	6	2.21	0.02262	up	BP
GO:0006094	gluconeogenesis	99	8	3.47	0.02279	up	BP
GO:0010887	negative regulation of cholesterol storage	7	2	0.25	0.02289	up	BP
GO:0042998	positive regulation of Golgi to plasma membrane protein transport	7	2	0.25	0.02289	up	BP
GO:0070995	NADPH oxidation	7	2	0.25	0.02289	up	BP
GO:1901978	positive regulation of cell cycle checkpoint	7	2	0.25	0.02289	up	BP
GO:0010989	negative regulation of low-density lipoprotein particle clearance	7	2	0.25	0.02289	up	BP
GO:1902031	regulation of NADP metabolic process	7	2	0.25	0.02289	up	BP
GO:0035860	glial cell-derived neurotrophic factor receptor signaling pathway	7	2	0.25	0.02289	up	BP
GO:1903862	positive regulation of oxidative phosphorylation	7	2	0.25	0.02289	up	BP
GO:0034201	response to oleic acid	7	2	0.25	0.02289	up	BP
GO:0042851	L-alanine metabolic process	7	2	0.25	0.02289	up	BP
GO:0042853	L-alanine catabolic process	7	2	0.25	0.02289	up	BP
GO:0090267	positive regulation of mitotic cell cycle spindle assembly checkpoint	7	2	0.25	0.02289	up	BP
GO:0009608	response to symbiont	7	2	0.25	0.02289	up	BP
GO:0090232	positive regulation of spindle checkpoint	7	2	0.25	0.02289	up	BP
GO:0090235	regulation of metaphase plate congression	7	2	0.25	0.02289	up	BP
GO:0022614	membrane to membrane docking	7	2	0.25	0.02289	up	BP
GO:0007018	microtubule-based movement	420	23	14.72	0.02316	up	BP
GO:1901992	positive regulation of mitotic cell cycle phase transition	81	7	2.84	0.02326	up	BP
GO:0006767	water-soluble vitamin metabolic process	81	7	2.84	0.02326	up	BP
GO:0031034	myosin filament assembly	18	3	0.63	0.02358	up	BP
GO:0006688	glycosphingolipid biosynthetic process	18	3	0.63	0.02358	up	BP
GO:0046655	folic acid metabolic process	18	3	0.63	0.02358	up	BP
GO:0006600	creatine metabolic process	18	3	0.63	0.02358	up	BP
GO:0050872	white fat cell differentiation	18	3	0.63	0.02358	up	BP
GO:0006754	ATP biosynthetic process	159	16	5.57	0.02371	up	BP
GO:0034599	cellular response to oxidative stress	331	19	11.6	0.02428	up	BP
GO:0032365	intracellular lipid transport	35	6	1.23	0.02431	up	BP
GO:1901976	regulation of cell cycle checkpoint	32	4	1.12	0.02464	up	BP
GO:0032878	regulation of establishment or maintenance of cell polarity	32	4	1.12	0.02464	up	BP
GO:0006636	unsaturated fatty acid biosynthetic process	32	4	1.12	0.02464	up	BP
GO:0015908	fatty acid transport	112	16	3.92	0.02555	up	BP
GO:0030865	cortical cytoskeleton organization	48	5	1.68	0.0257	up	BP
GO:0046112	nucleobase biosynthetic process	19	3	0.67	0.02729	up	BP
GO:1990000	amyloid fibril formation	19	3	0.67	0.02729	up	BP
GO:0050858	negative regulation of antigen receptor-mediated signaling pathway	19	3	0.67	0.02729	up	BP
GO:0010823	negative regulation of mitochondrion organization	66	6	2.31	0.02774	up	BP
GO:1905953	negative regulation of lipid localization	49	5	1.72	0.02783	up	BP
GO:0051293	establishment of spindle localization	49	5	1.72	0.02783	up	BP
GO:0071825	protein-lipid complex subunit organization	49	5	1.72	0.02783	up	BP
GO:0019319	hexose biosynthetic process	103	8	3.61	0.0281	up	BP
GO:0010821	regulation of mitochondrion organization	163	11	5.71	0.02845	up	BP
GO:0006739	NADP metabolic process	43	8	1.51	0.02933	up	BP
GO:1901685	glutathione derivative metabolic process	8	2	0.28	0.02983	up	BP
GO:1901687	glutathione derivative biosynthetic process	8	2	0.28	0.02983	up	BP
GO:0008216	spermidine metabolic process	8	2	0.28	0.02983	up	BP
GO:0060346	bone trabecula formation	8	2	0.28	0.02983	up	BP
GO:0050907	detection of chemical stimulus involved in sensory perception	8	2	0.28	0.02983	up	BP
GO:0006003	fructose 2,6-bisphosphate metabolic process	8	2	0.28	0.02983	up	BP
GO:1904823	purine nucleobase transmembrane transport	8	2	0.28	0.02983	up	BP
GO:1900272	negative regulation of long-term synaptic potentiation	8	2	0.28	0.02983	up	BP
GO:0009080	pyruvate family amino acid catabolic process	8	2	0.28	0.02983	up	BP
GO:0006335	DNA replication-dependent nucleosome assembly	8	2	0.28	0.02983	up	BP
GO:0006108	malate metabolic process	8	2	0.28	0.02983	up	BP
GO:0006287	base-excision repair, gap-filling	8	2	0.28	0.02983	up	BP
GO:0009445	putrescine metabolic process	8	2	0.28	0.02983	up	BP
GO:0002154	thyroid hormone mediated signaling pathway	8	2	0.28	0.02983	up	BP
GO:0009221	pyrimidine deoxyribonucleotide biosynthetic process	8	2	0.28	0.02983	up	BP
GO:0006524	alanine catabolic process	8	2	0.28	0.02983	up	BP
GO:1905242	response to 3,3',5-triiodo-L-thyronine	8	2	0.28	0.02983	up	BP
GO:0034723	DNA replication-dependent nucleosome organization	8	2	0.28	0.02983	up	BP
GO:0017185	peptidyl-lysine hydroxylation	8	2	0.28	0.02983	up	BP
GO:0090261	positive regulation of inclusion body assembly	8	2	0.28	0.02983	up	BP
GO:0030240	skeletal muscle thin filament assembly	8	2	0.28	0.02983	up	BP
GO:0090207	regulation of triglyceride metabolic process	50	5	1.75	0.03006	up	BP
GO:0060669	embryonic placenta morphogenesis	34	4	1.19	0.03009	up	BP
GO:0005975	carbohydrate metabolic process	609	34	21.34	0.03016	up	BP
GO:1902749	regulation of cell cycle G2/M phase transition	207	13	7.25	0.03059	up	BP
GO:0050667	homocysteine metabolic process	20	3	0.7	0.03129	up	BP
GO:0071397	cellular response to cholesterol	20	3	0.7	0.03129	up	BP
GO:0006271	DNA strand elongation involved in DNA replication	20	3	0.7	0.03129	up	BP
GO:0090083	regulation of inclusion body assembly	20	3	0.7	0.03129	up	BP
GO:1901606	alpha-amino acid catabolic process	112	11	3.92	0.0316	up	BP
GO:0042180	cellular ketone metabolic process	205	18	7.18	0.03171	up	BP
GO:0097345	mitochondrial outer membrane permeabilization	51	5	1.79	0.03241	up	BP
GO:0043062	extracellular structure organization	388	21	13.6	0.0325	up	BP
GO:0061982	meiosis I cell cycle process	106	8	3.71	0.03259	up	BP
GO:0006090	pyruvate metabolic process	135	14	4.73	0.03261	up	BP
GO:0045471	response to ethanol	209	13	7.32	0.0327	up	BP
GO:0046434	organophosphate catabolic process	254	15	8.9	0.03415	up	BP
GO:1900542	regulation of purine nucleotide metabolic process	107	8	3.75	0.0342	up	BP
GO:0071456	cellular response to hypoxia	189	12	6.62	0.03427	up	BP
GO:0032803	regulation of low-density lipoprotein particle receptor catabolic process	8	5	0.28	0.03476	up	BP
GO:0030811	regulation of nucleotide catabolic process	52	5	1.82	0.03486	up	BP
GO:0042982	amyloid precursor protein metabolic process	52	5	1.82	0.03486	up	BP
GO:0072698	protein localization to microtubule cytoskeleton	52	5	1.82	0.03486	up	BP
GO:0006110	regulation of glycolytic process	52	5	1.82	0.03486	up	BP
GO:1905600	regulation of receptor-mediated endocytosis involved in cholesterol transport	4	3	0.14	0.0349	up	BP
GO:0031589	cell-substrate adhesion	345	19	12.09	0.035	up	BP
GO:0031033	myosin filament organization	21	3	0.74	0.03558	up	BP
GO:0055119	relaxation of cardiac muscle	21	3	0.74	0.03558	up	BP
GO:0051450	myoblast proliferation	21	3	0.74	0.03558	up	BP
GO:0005996	monosaccharide metabolic process	306	19	10.72	0.0362	up	BP
GO:0032467	positive regulation of cytokinesis	36	4	1.26	0.0362	up	BP
GO:0098754	detoxification	96	13	3.36	0.03628	up	BP
GO:0032802	low-density lipoprotein particle receptor catabolic process	16	6	0.56	0.03691	up	BP
GO:1902110	positive regulation of mitochondrial membrane permeability involved in apoptotic process	53	5	1.86	0.03743	up	BP
GO:0072383	plus-end-directed vesicle transport along microtubule	9	2	0.32	0.03747	up	BP
GO:0033700	phospholipid efflux	9	2	0.32	0.03747	up	BP
GO:0032372	negative regulation of sterol transport	9	2	0.32	0.03747	up	BP
GO:0032375	negative regulation of cholesterol transport	9	2	0.32	0.03747	up	BP
GO:0044341	sodium-dependent phosphate transport	9	2	0.32	0.03747	up	BP
GO:0010985	negative regulation of lipoprotein particle clearance	9	2	0.32	0.03747	up	BP
GO:0010911	regulation of isomerase activity	9	2	0.32	0.03747	up	BP
GO:0010912	positive regulation of isomerase activity	9	2	0.32	0.03747	up	BP
GO:0039536	negative regulation of RIG-I signaling pathway	9	2	0.32	0.03747	up	BP
GO:0009078	pyruvate family amino acid metabolic process	9	2	0.32	0.03747	up	BP
GO:0071896	protein localization to adherens junction	9	2	0.32	0.03747	up	BP
GO:0015671	oxygen transport	9	2	0.32	0.03747	up	BP
GO:0006273	lagging strand elongation	9	2	0.32	0.03747	up	BP
GO:0035900	response to isolation stress	9	2	0.32	0.03747	up	BP
GO:0002227	innate immune response in mucosa	9	2	0.32	0.03747	up	BP
GO:0006563	L-serine metabolic process	9	2	0.32	0.03747	up	BP
GO:0006522	alanine metabolic process	9	2	0.32	0.03747	up	BP
GO:0051969	regulation of transmission of nerve impulse	9	2	0.32	0.03747	up	BP
GO:0043987	histone H3-S10 phosphorylation	9	2	0.32	0.03747	up	BP
GO:0070813	hydrogen sulfide metabolic process	9	2	0.32	0.03747	up	BP
GO:0009308	amine metabolic process	109	8	3.82	0.03756	up	BP
GO:0019915	lipid storage	71	6	2.49	0.03786	up	BP
GO:0044784	metaphase/anaphase transition of cell cycle	59	14	2.07	0.03806	up	BP
GO:0007091	metaphase/anaphase transition of mitotic cell cycle	57	13	2	0.03826	up	BP
GO:0006820	anion transport	570	42	19.97	0.03842	up	BP
GO:0051303	establishment of chromosome localization	73	12	2.56	0.03859	up	BP
GO:0030261	chromosome condensation	41	8	1.44	0.03922	up	BP
GO:0051225	spindle assembly	109	15	3.82	0.03946	up	BP
GO:0031116	positive regulation of microtubule polymerization	37	4	1.3	0.03951	up	BP
GO:0031639	plasminogen activation	37	4	1.3	0.03951	up	BP
GO:0045143	homologous chromosome segregation	54	5	1.89	0.04011	up	BP
GO:0033599	regulation of mammary gland epithelial cell proliferation	22	3	0.77	0.04016	up	BP
GO:0031065	positive regulation of histone deacetylation	22	3	0.77	0.04016	up	BP
GO:0002082	regulation of oxidative phosphorylation	22	3	0.77	0.04016	up	BP
GO:1900740	positive regulation of protein insertion into mitochondrial membrane involved in apoptotic signaling pathway	22	3	0.77	0.04016	up	BP
GO:1900739	regulation of protein insertion into mitochondrial membrane involved in apoptotic signaling pathway	22	3	0.77	0.04016	up	BP
GO:0034367	protein-containing complex remodeling	22	3	0.77	0.04016	up	BP
GO:0034368	protein-lipid complex remodeling	22	3	0.77	0.04016	up	BP
GO:0034369	plasma lipoprotein particle remodeling	22	3	0.77	0.04016	up	BP
GO:0045109	intermediate filament organization	22	3	0.77	0.04016	up	BP
GO:0006672	ceramide metabolic process	91	7	3.19	0.04039	up	BP
GO:0016053	organic acid biosynthetic process	355	30	12.44	0.04061	up	BP
GO:0008637	apoptotic mitochondrial changes	132	9	4.63	0.04249	up	BP
GO:0009142	nucleoside triphosphate biosynthetic process	195	17	6.83	0.04261	up	BP
GO:0001975	response to amphetamine	38	4	1.33	0.04298	up	BP
GO:0051294	establishment of spindle orientation	38	4	1.33	0.04298	up	BP
GO:0050000	chromosome localization	74	12	2.59	0.04328	up	BP
GO:0007568	aging	448	23	15.7	0.0435	up	BP
GO:0042246	tissue regeneration	93	7	3.26	0.04459	up	BP
GO:0009206	purine ribonucleoside triphosphate biosynthetic process	175	16	6.13	0.04485	up	BP
GO:0010866	regulation of triglyceride biosynthetic process	23	3	0.81	0.04502	up	BP
GO:0046337	phosphatidylethanolamine metabolic process	23	3	0.81	0.04502	up	BP
GO:0042135	neurotransmitter catabolic process	23	3	0.81	0.04502	up	BP
GO:0070193	synaptonemal complex organization	23	3	0.81	0.04502	up	BP
GO:0036315	cellular response to sterol	23	3	0.81	0.04502	up	BP
GO:0007006	mitochondrial membrane organization	146	13	5.12	0.04503	up	BP
GO:0032799	low-density lipoprotein receptor particle metabolic process	17	6	0.6	0.0451	up	BP
GO:0045542	positive regulation of cholesterol biosynthetic process	10	2	0.35	0.04577	up	BP
GO:0072386	plus-end-directed organelle transport along microtubule	10	2	0.35	0.04577	up	BP
GO:0086073	bundle of His cell-Purkinje myocyte adhesion involved in cell communication	10	2	0.35	0.04577	up	BP
GO:0051315	attachment of mitotic spindle microtubules to kinetochore	10	2	0.35	0.04577	up	BP
GO:0010968	regulation of microtubule nucleation	10	2	0.35	0.04577	up	BP
GO:0051451	myoblast migration	10	2	0.35	0.04577	up	BP
GO:0051798	positive regulation of hair follicle development	10	2	0.35	0.04577	up	BP
GO:0106120	positive regulation of sterol biosynthetic process	10	2	0.35	0.04577	up	BP
GO:0010041	response to iron(III) ion	10	2	0.35	0.04577	up	BP
GO:1902101	positive regulation of metaphase/anaphase transition of cell cycle	10	2	0.35	0.04577	up	BP
GO:0060956	endocardial cell differentiation	10	2	0.35	0.04577	up	BP
GO:0046533	negative regulation of photoreceptor cell differentiation	10	2	0.35	0.04577	up	BP
GO:0097066	response to thyroid hormone	56	5	1.96	0.04581	up	BP
GO:0045744	negative regulation of G protein-coupled receptor signaling pathway	56	5	1.96	0.04581	up	BP
GO:0048515	spermatid differentiation	134	9	4.7	0.04602	up	BP
GO:0006576	cellular biogenic amine metabolic process	94	7	3.29	0.04679	up	BP
GO:0001578	microtubule bundle formation	114	8	3.99	0.04692	up	BP
GO:0034614	cellular response to reactive oxygen species	199	12	6.97	0.04768	up	BP
GO:0009145	purine nucleoside triphosphate biosynthetic process	177	16	6.2	0.04817	up	BP
GO:0051653	spindle localization	57	5	2	0.04883	up	BP
GO:0031529	ruffle organization	57	5	2	0.04883	up	BP
GO:0009166	nucleotide catabolic process	178	11	6.24	0.04884	up	BP
GO:0003735	structural constituent of ribosome	152	72	4.75	1e-30	down	MF
GO:0032393	MHC class I receptor activity	12	9	0.37	5.2e-12	down	MF
GO:0004867	serine-type endopeptidase inhibitor activity	59	13	1.84	2.4e-08	down	MF
GO:0070180	large ribosomal subunit rRNA binding	5	5	0.16	2.9e-08	down	MF
GO:0004252	serine-type endopeptidase activity	122	18	3.81	4.1e-08	down	MF
GO:0004857	enzyme inhibitor activity	315	32	9.83	3.1e-07	down	MF
GO:0008097	5S rRNA binding	18	7	0.56	6.5e-07	down	MF
GO:0003723	RNA binding	1088	97	33.97	1e-06	down	MF
GO:0003746	translation elongation factor activity	15	6	0.47	3.5e-06	down	MF
GO:0008201	heparin binding	167	17	5.21	1.8e-05	down	MF
GO:1990948	ubiquitin ligase inhibitor activity	7	4	0.22	3e-05	down	MF
GO:0003743	translation initiation factor activity	54	9	1.69	3.9e-05	down	MF
GO:0019843	rRNA binding	76	25	2.37	4.1e-05	down	MF
GO:0003729	mRNA binding	228	22	7.12	5.9e-05	down	MF
GO:0004866	endopeptidase inhibitor activity	107	21	3.34	8.5e-05	down	MF
GO:0005179	hormone activity	56	8	1.75	0.00032	down	MF
GO:0005539	glycosaminoglycan binding	214	24	6.68	0.00048	down	MF
GO:0001848	complement binding	23	5	0.72	0.00061	down	MF
GO:0001530	lipopolysaccharide binding	25	5	0.78	0.00092	down	MF
GO:0070181	small ribosomal subunit rRNA binding	7	3	0.22	0.00096	down	MF
GO:0017134	fibroblast growth factor binding	29	5	0.91	0.00185	down	MF
GO:0070891	lipoteichoic acid binding	9	3	0.28	0.0022	down	MF
GO:0002020	protease binding	150	12	4.68	0.00259	down	MF
GO:1990459	transferrin receptor binding	11	3	0.34	0.00413	down	MF
GO:0043236	laminin binding	35	5	1.09	0.00433	down	MF
GO:0008656	cysteine-type endopeptidase activator activity involved in apoptotic process	22	4	0.69	0.00438	down	MF
GO:0015026	coreceptor activity	36	5	1.12	0.00491	down	MF
GO:0043021	ribonucleoprotein complex binding	142	11	4.43	0.00491	down	MF
GO:0019966	interleukin-1 binding	12	3	0.37	0.00538	down	MF
GO:0004771	sterol esterase activity	12	3	0.37	0.00538	down	MF
GO:0015091	ferric iron transmembrane transporter activity	4	2	0.12	0.00559	down	MF
GO:0061929	gamma-glutamylaminecyclotransferase activity	4	2	0.12	0.00559	down	MF
GO:0004549	tRNA-specific ribonuclease activity	13	3	0.41	0.00684	down	MF
GO:0048027	mRNA 5'-UTR binding	25	4	0.78	0.00703	down	MF
GO:0019959	interleukin-8 binding	5	2	0.16	0.00913	down	MF
GO:0048403	brain-derived neurotrophic factor binding	5	2	0.16	0.00913	down	MF
GO:0098821	BMP receptor activity	5	2	0.16	0.00913	down	MF
GO:0030292	protein tyrosine kinase inhibitor activity	5	2	0.16	0.00913	down	MF
GO:0042834	peptidoglycan binding	15	3	0.47	0.01039	down	MF
GO:0048406	nerve growth factor binding	15	3	0.47	0.01039	down	MF
GO:0031369	translation initiation factor binding	43	5	1.34	0.01049	down	MF
GO:0030515	snoRNA binding	28	4	0.87	0.01058	down	MF
GO:0050839	cell adhesion molecule binding	250	15	7.81	0.01193	down	MF
GO:0039706	co-receptor binding	6	2	0.19	0.01342	down	MF
GO:0036122	BMP binding	6	2	0.19	0.01342	down	MF
GO:0008200	ion channel inhibitor activity	46	5	1.44	0.01385	down	MF
GO:0019855	calcium channel inhibitor activity	17	3	0.53	0.01482	down	MF
GO:0016248	channel inhibitor activity	49	5	1.53	0.01787	down	MF
GO:0019865	immunoglobulin binding	10	5	0.31	0.01813	down	MF
GO:0050253	retinyl-palmitate esterase activity	7	2	0.22	0.0184	down	MF
GO:0043120	tumor necrosis factor binding	7	2	0.22	0.0184	down	MF
GO:0004806	triglyceride lipase activity	20	3	0.62	0.0232	down	MF
GO:0070001	aspartic-type peptidase activity	20	3	0.62	0.0232	down	MF
GO:0004190	aspartic-type endopeptidase activity	20	3	0.62	0.0232	down	MF
GO:0089720	caspase binding	8	2	0.25	0.02403	down	MF
GO:0001094	TFIID-class transcription factor complex binding	8	2	0.25	0.02403	down	MF
GO:0005007	fibroblast growth factor-activated receptor activity	8	2	0.25	0.02403	down	MF
GO:0047372	acylglycerol lipase activity	21	3	0.66	0.02646	down	MF
GO:0003730	mRNA 3'-UTR binding	74	6	2.31	0.0278	down	MF
GO:0019955	cytokine binding	87	9	2.72	0.02858	down	MF
GO:0008266	poly(U) RNA binding	22	3	0.69	0.02994	down	MF
GO:0070034	telomerase RNA binding	22	3	0.69	0.02994	down	MF
GO:0004526	ribonuclease P activity	9	2	0.28	0.03027	down	MF
GO:0031714	C5a anaphylatoxin chemotactic receptor binding	4	4	0.12	0.03098	down	MF
GO:0000979	RNA polymerase II core promoter sequence-specific DNA binding	23	3	0.72	0.03366	down	MF
GO:0004180	carboxypeptidase activity	40	4	1.25	0.03531	down	MF
GO:0004521	endoribonuclease activity	59	5	1.84	0.03654	down	MF
GO:0042500	aspartic endopeptidase activity, intramembrane cleaving	10	2	0.31	0.03706	down	MF
GO:0043394	proteoglycan binding	41	4	1.28	0.0382	down	MF
GO:0005246	calcium channel regulator activity	41	4	1.28	0.0382	down	MF
GO:0043022	ribosome binding	61	5	1.9	0.04131	down	MF
GO:0140296	general transcription initiation factor binding	43	4	1.34	0.04437	down	MF
GO:0051978	lysophospholipid:sodium symporter activity	8	6	0.29	5.6e-08	up	MF
GO:0008017	microtubule binding	247	24	8.91	1e-05	up	MF
GO:0032052	bile acid binding	17	6	0.61	1.9e-05	up	MF
GO:0050462	N-acetylneuraminate synthase activity	6	4	0.22	2.4e-05	up	MF
GO:0047444	N-acylneuraminate-9-phosphate synthase activity	6	4	0.22	2.4e-05	up	MF
GO:0016209	antioxidant activity	75	11	2.71	7.3e-05	up	MF
GO:0005324	long-chain fatty acid transporter activity	14	5	0.51	9.1e-05	up	MF
GO:0008781	N-acylneuraminate cytidylyltransferase activity	8	4	0.29	0.0001	up	MF
GO:0009922	fatty acid elongase activity	4	3	0.14	0.00018	up	MF
GO:0004768	stearoyl-CoA 9-desaturase activity	4	3	0.14	0.00018	up	MF
GO:0102756	very-long-chain 3-ketoacyl-CoA synthase activity	4	3	0.14	0.00018	up	MF
GO:0102336	3-oxo-arachidoyl-CoA synthase activity	4	3	0.14	0.00018	up	MF
GO:0102337	3-oxo-cerotoyl-CoA synthase activity	4	3	0.14	0.00018	up	MF
GO:0102338	3-oxo-lignoceronyl-CoA synthase activity	4	3	0.14	0.00018	up	MF
GO:0044548	S100 protein binding	17	5	0.61	0.00026	up	MF
GO:0016616	oxidoreductase activity, acting on the CH-OH group of donors, NAD or NADP as acceptor	115	14	4.15	0.00068	up	MF
GO:0009055	electron transfer activity	134	16	4.84	0.00072	up	MF
GO:0005506	iron ion binding	130	13	4.69	0.00083	up	MF
GO:0034604	pyruvate dehydrogenase (NAD+) activity	6	3	0.22	0.00086	up	MF
GO:0051287	NAD binding	70	9	2.53	0.00088	up	MF
GO:0004111	creatine kinase activity	13	4	0.47	0.00092	up	MF
GO:0102391	decanoate-CoA ligase activity	13	4	0.47	0.00092	up	MF
GO:0005524	ATP binding	1497	76	54.03	0.00115	up	MF
GO:0005544	calcium-dependent phospholipid binding	36	6	1.3	0.00166	up	MF
GO:0005504	fatty acid binding	49	7	1.77	0.00176	up	MF
GO:0036094	small molecule binding	2509	137	90.55	0.00189	up	MF
GO:0004029	aldehyde dehydrogenase (NAD+) activity	16	4	0.58	0.00215	up	MF
GO:0005200	structural constituent of cytoskeleton	95	10	3.43	0.0022	up	MF
GO:0016878	acid-thiol ligase activity	34	8	1.23	0.00266	up	MF
GO:0004467	long-chain fatty acid-CoA ligase activity	17	4	0.61	0.00274	up	MF
GO:0003777	microtubule motor activity	98	10	3.54	0.00278	up	MF
GO:0016887	ATP hydrolysis activity	406	26	14.65	0.00335	up	MF
GO:0043168	anion binding	2762	143	99.68	0.0037	up	MF
GO:0042803	protein homodimerization activity	876	47	31.61	0.00389	up	MF
GO:0050661	NADP binding	44	6	1.59	0.00471	up	MF
GO:0072341	modified amino acid binding	74	8	2.67	0.00506	up	MF
GO:0004129	cytochrome-c oxidase activity	21	4	0.76	0.00614	up	MF
GO:0051536	iron-sulfur cluster binding	61	7	2.2	0.00617	up	MF
GO:0004859	phospholipase inhibitor activity	11	3	0.4	0.0062	up	MF
GO:0046933	proton-transporting ATP synthase activity, rotational mechanism	11	3	0.4	0.0062	up	MF
GO:0008948	oxaloacetate decarboxylase activity	4	2	0.14	0.00743	up	MF
GO:0019136	deoxynucleoside kinase activity	4	2	0.14	0.00743	up	MF
GO:0071532	ankyrin repeat binding	4	2	0.14	0.00743	up	MF
GO:0016405	CoA-ligase activity	29	7	1.05	0.00788	up	MF
GO:0042605	peptide antigen binding	12	3	0.43	0.00805	up	MF
GO:0016651	oxidoreductase activity, acting on NAD(P)H	97	9	3.5	0.00826	up	MF
GO:0034452	dynactin binding	13	3	0.47	0.01019	up	MF
GO:0016491	oxidoreductase activity	658	64	23.75	0.01151	up	MF
GO:0003873	6-phosphofructo-2-kinase activity	5	2	0.18	0.01209	up	MF
GO:0016728	oxidoreductase activity, acting on CH or CH2 groups, disulfide as acceptor	5	2	0.18	0.01209	up	MF
GO:0061731	ribonucleoside-diphosphate reductase activity	5	2	0.18	0.01209	up	MF
GO:0070326	very-low-density lipoprotein particle receptor binding	5	2	0.18	0.01209	up	MF
GO:0004748	ribonucleoside-diphosphate reductase activity, thioredoxin disulfide as acceptor	5	2	0.18	0.01209	up	MF
GO:0022804	active transmembrane transporter activity	422	33	15.23	0.01238	up	MF
GO:0008307	structural constituent of muscle	54	6	1.95	0.01275	up	MF
GO:0016628	oxidoreductase activity, acting on the CH-CH group of donors, NAD or NADP as acceptor	26	4	0.94	0.01332	up	MF
GO:0046982	protein heterodimerization activity	545	30	19.67	0.01408	up	MF
GO:0051015	actin filament binding	181	13	6.53	0.01412	up	MF
GO:0019825	oxygen binding	27	4	0.97	0.0152	up	MF
GO:0004623	phospholipase A2 activity	27	4	0.97	0.0152	up	MF
GO:0001786	phosphatidylserine binding	41	5	1.48	0.01539	up	MF
GO:0051539	4 iron, 4 sulfur cluster binding	42	5	1.52	0.01696	up	MF
GO:0036402	proteasome-activating activity	6	2	0.22	0.0177	up	MF
GO:0019834	phospholipase A2 inhibitor activity	6	2	0.22	0.0177	up	MF
GO:0008121	ubiquinol-cytochrome-c reductase activity	6	2	0.22	0.0177	up	MF
GO:0001665	alpha-N-acetylgalactosaminide alpha-2,6-sialyltransferase activity	6	2	0.22	0.0177	up	MF
GO:0035374	chondroitin sulfate binding	6	2	0.22	0.0177	up	MF
GO:0000287	magnesium ion binding	228	15	8.23	0.01837	up	MF
GO:0015175	neutral amino acid transmembrane transporter activity	43	5	1.55	0.01864	up	MF
GO:0043177	organic acid binding	215	16	7.76	0.0209	up	MF
GO:0019842	vitamin binding	132	10	4.76	0.02113	up	MF
GO:0004028	3-chloroallyl aldehyde dehydrogenase activity	7	2	0.25	0.02419	up	MF
GO:0004128	cytochrome-b5 reductase activity, acting on NAD(P)H	7	2	0.25	0.02419	up	MF
GO:0047499	calcium-independent phospholipase A2 activity	7	2	0.25	0.02419	up	MF
GO:0008296	3'-5'-exodeoxyribonuclease activity	7	2	0.25	0.02419	up	MF
GO:0016679	oxidoreductase activity, acting on diphenols and related substances as donors	7	2	0.25	0.02419	up	MF
GO:0051011	microtubule minus-end binding	7	2	0.25	0.02419	up	MF
GO:0016411	acylglycerol O-acyltransferase activity	31	4	1.12	0.02435	up	MF
GO:0004602	glutathione peroxidase activity	18	3	0.65	0.02545	up	MF
GO:0034061	DNA polymerase activity	32	4	1.15	0.02706	up	MF
GO:0005543	phospholipid binding	412	27	14.87	0.02856	up	MF
GO:0016668	oxidoreductase activity, acting on a sulfur group of donors, NAD(P) as acceptor	19	3	0.69	0.02943	up	MF
GO:0008440	inositol-1,4,5-trisphosphate 3-kinase activity	8	2	0.29	0.0315	up	MF
GO:0008199	ferric iron binding	8	2	0.29	0.0315	up	MF
GO:0005344	oxygen carrier activity	8	2	0.29	0.0315	up	MF
GO:0005345	purine nucleobase transmembrane transporter activity	8	2	0.29	0.0315	up	MF
GO:0043515	kinetochore binding	8	2	0.29	0.0315	up	MF
GO:0016615	malate dehydrogenase activity	8	2	0.29	0.0315	up	MF
GO:0004745	NAD-retinol dehydrogenase activity	8	2	0.29	0.0315	up	MF
GO:0004331	fructose-2,6-bisphosphate 2-phosphatase activity	8	2	0.29	0.0315	up	MF
GO:0004030	aldehyde dehydrogenase [NAD(P)+] activity	17	5	0.61	0.0358	up	MF
GO:0008374	O-acyltransferase activity	51	5	1.84	0.03607	up	MF
GO:0016645	oxidoreductase activity, acting on the CH-NH group of donors	26	7	0.94	0.03746	up	MF
GO:0030170	pyridoxal phosphate binding	52	5	1.88	0.03878	up	MF
GO:0051766	inositol trisphosphate kinase activity	9	2	0.32	0.03954	up	MF
GO:0016653	oxidoreductase activity, acting on NAD(P)H, heme protein as acceptor	9	2	0.32	0.03954	up	MF
GO:0015205	nucleobase transmembrane transporter activity	9	2	0.32	0.03954	up	MF
GO:0070279	vitamin B6 binding	53	5	1.91	0.0416	up	MF
GO:0004033	aldo-keto reductase (NADP) activity	22	3	0.79	0.04321	up	MF
GO:0015399	primary active transmembrane transporter activity	236	17	8.52	0.0457	up	MF
GO:0016627	oxidoreductase activity, acting on the CH-CH group of donors	55	5	1.98	0.04761	up	MF
GO:0048306	calcium-dependent protein binding	73	6	2.63	0.04779	up	MF
GO:0008443	phosphofructokinase activity	10	2	0.36	0.04827	up	MF
GO:0086083	cell adhesive protein binding involved in bundle of His cell-Purkinje myocyte communication	10	2	0.36	0.04827	up	MF
GO:0035173	histone kinase activity	23	3	0.83	0.04841	up	MF
